# Supplementary material for: Coexisting service-related factors preceding suicide: a network analysis
Source: PubMed Central journal article supplement — BMJ Open. 2022 Apr 21;12(4):e050953. doi: 10.1136/bmjopen-2021-050953 (PMC9024253; doi:10.1136/bmjopen-2021-050953), 2022-04-21

# BMJ Open

BMJ Open is committed to open peer review. As part of this commitment we make the peer review history of every article we publish publicly available.

When an article is published we post the peer reviewers' comments and the authors' responses online. We also post the versions of the paper that were used during peer review. These are the versions that the peer review comments apply to.

The versions of the paper that follow are the versions that were submitted during the peer review process. They are not the versions of record or the final published versions. They should not be cited or distributed as the published version of this manuscript.

BMJ Open is an open access journal and the full, final, typeset and author-corrected version of record of the manuscript is available on our site with no access controls, subscription charges or pay-per-view fees (<http://bmjopen.bmj.com>).

If you have any questions on BMJ Open's open peer review process please email [info.bmjopen@bmj.com](mailto:info.bmjopen@bmj.com)

# BMJ Open

## Coexisting service related factors preceding suicide: a network analysis

|                               |                                                                                                                                                                                                                                                                                                                                                                                                                                                                                                                                                                                                                                                                                                                                                                          |
|-------------------------------|--------------------------------------------------------------------------------------------------------------------------------------------------------------------------------------------------------------------------------------------------------------------------------------------------------------------------------------------------------------------------------------------------------------------------------------------------------------------------------------------------------------------------------------------------------------------------------------------------------------------------------------------------------------------------------------------------------------------------------------------------------------------------|
| Journal:                      | <i>BMJ Open</i>                                                                                                                                                                                                                                                                                                                                                                                                                                                                                                                                                                                                                                                                                                                                                          |
| Manuscript ID                 | bmjopen-2021-050953                                                                                                                                                                                                                                                                                                                                                                                                                                                                                                                                                                                                                                                                                                                                                      |
| Article Type:                 | Original research                                                                                                                                                                                                                                                                                                                                                                                                                                                                                                                                                                                                                                                                                                                                                        |
| Date Submitted by the Author: | 15-Mar-2021                                                                                                                                                                                                                                                                                                                                                                                                                                                                                                                                                                                                                                                                                                                                                              |
| Complete List of Authors:     | <p>Rex, Malin; University of Gothenburg, Institute of Health and Care Sciences, Sahlgrenska Academy; Sahlgrenska University Hospital, Affective clinic</p> <p>Brezicka, Thomas; Sahlgrenska University Hospital, Department for quality and patient safety</p> <p>Carlström, Eric; University of Gothenburg, Institute of Health and Care Sciences, Sahlgrenska Academy; University of Gothenburg, Centre for Person-Centred Care (GPCC)</p> <p>Waern, Margda; University of Gothenburg, Institute of Neuroscience and Physiology, Sahlgrenska Academy; Sahlgrenska University Hospital, Psychosis Clinic</p> <p>Ali, Lilas; University of Gothenburg, Institute of Health and Care Sciences, Sahlgrenska Academy; Sahlgrenska University Hospital, Affective Clinic</p> |
| Keywords:                     | Suicide & self-harm < PSYCHIATRY, PSYCHIATRY, Adult psychiatry < PSYCHIATRY, Depression & mood disorders < PSYCHIATRY                                                                                                                                                                                                                                                                                                                                                                                                                                                                                                                                                                                                                                                    |
|                               |                                                                                                                                                                                                                                                                                                                                                                                                                                                                                                                                                                                                                                                                                                                                                                          |

SCHOLARONE™  
Manuscripts

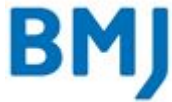

I, the Submitting Author has the right to grant and does grant on behalf of all authors of the Work (as defined in the below author licence), an exclusive licence and/or a non-exclusive licence for contributions from authors who are: i) UK Crown employees; ii) where BMJ has agreed a CC-BY licence shall apply, and/or iii) in accordance with the terms applicable for US Federal Government officers or employees acting as part of their official duties; on a worldwide, perpetual, irrevocable, royalty-free basis to BMJ Publishing Group Ltd ("BMJ") its licensees and where the relevant Journal is co-owned by BMJ to the co-owners of the Journal, to publish the Work in this journal and any other BMJ products and to exploit all rights, as set out in our [licence](#).

The Submitting Author accepts and understands that any supply made under these terms is made by BMJ to the Submitting Author unless you are acting as an employee on behalf of your employer or a postgraduate student of an affiliated institution which is paying any applicable article publishing charge ("APC") for Open Access articles. Where the Submitting Author wishes to make the Work available on an Open Access basis (and intends to pay the relevant APC), the terms of reuse of such Open Access shall be governed by a Creative Commons licence – details of these licences and which [Creative Commons](#) licence will apply to this Work are set out in our licence referred to above.

Other than as permitted in any relevant BMJ Author's Self Archiving Policies, I confirm this Work has not been accepted for publication elsewhere, is not being considered for publication elsewhere and does not duplicate material already published. I confirm all authors consent to publication of this Work and authorise the granting of this licence.

# Coexisting service related factors preceding suicide: a network analysis

Malin Rex<sup>1,2</sup>, Thomas Brezicka<sup>4</sup>, Eric Carlström<sup>1,3</sup>, Margda Waern<sup>5,6</sup>, Lilas Ali<sup>1,2</sup>.

<sup>1</sup> University of Gothenburg, Institute of Health and Care Sciences, Sahlgrenska Academy Gothenburg, Region Västra Götaland, Sweden

<sup>2</sup> Sahlgrenska University Hospital, Affective clinic Gothenburg, Region Västra Götaland, Sweden

<sup>3</sup> University of Gothenburg, Centre for Person-Centred Care (GPCC) Gothenburg, Region Västra Götaland, Sweden

<sup>4</sup> Sahlgrenska University Hospital, Department for quality and patient safety Gothenburg, Region Västra Götaland, Sweden

<sup>5</sup> University of Gothenburg, Institute of Neuroscience and Physiology, Sahlgrenska Academy Gothenburg, Region Västra Götaland, Sweden

<sup>6</sup> Sahlgrenska University Hospital, Psychosis Clinic Gothenburg, Region Västra Götaland, Sweden

Correspondence to: Malin Rex

## POSTAL ADDRESS

University of Gothenburg, Institute of Health and Care Sciences  
Box 457  
405 30 Göteborg, Sweden

malin.rex@gu.se

+46-761199908

Keywords: Suicide, Patient safety, Psychiatry, Mood disorders, Self-Injurious Behavior

Word count: 2675 (excluding title page, abstract, tables, acknowledgements, contributions, and references.)

## ABSTRACT

### Objectives

The overall objective was to illustrate the interdependency of events involved in the complex processes that precede suicide. More specifically, we aimed to map clusters in the synthesized network of events, root causes, and suggested actions reported in post-suicide RCA data and to explore potential interactions among those clusters and the preventive measures recommended by the RCA team.

## Design and setting

Explorative, retrospective study of post-suicide RCA data from Swedish primary and secondary healthcare.

## Participants

217 suicide cases reported to the national database for RCA (NITHA) between 2012 and 2017.

## Primary and secondary outcome measures

Demographic data and frequencies of reported deficiencies and actions were registered. Themes were identified for correlation tests to produce a network of interlinked nodes and calculate network metrics (degree, betweenness and Eigenvector scores).

## Results

We identified 499 adverse events, 462 root causes, and 700 suggested actions. The network analysis yielded 25 nodes clustered in four patient safety domains. The largest cluster, involving the patient–caregiver interface, was dominated by the node focused on evaluation. A second cluster involved interactions among co-workers and recommendations directed towards optimizing organizational resources and improving cooperation. The third cluster involved the interface between two or more units and included follow-up, continuity, and planning as areas needing improvement. The final and smallest cluster involved safety issues in the care environment.

## Conclusion

Network analysis can be a useful tool to uncover structures relevant to suicide prevention in healthcare settings. In planning interventions, it is important to look beyond single deficiencies and to employ multifactorial strategies. Detected risk factors increases the likelihood of the presence of another risk factor from the same cluster. Also, implemented actions will probably influence multiple factors within the same cluster, which must be considered when evaluating the effect of a taken intervention.

## SUMMARY - STRENGTHS AND LIMITATIONS OF THIS STUDY

- To our knowledge, this is the first network study based on post-suicide audits.
- The study provides new insights, not only on single factors, but on risk-prone clusters in suicide prevention.
- Data were collected from NITHA, the only open national resource in Sweden for the dissemination of RCA reports.
- This study does not focus on details concerning the patients, but on how the suicide prevention was organized.
- A relatively small proportion of all suicides were submitted to the database.

## BACKGROUND

Suicide is a serious public health issue that affects people of all ages, socio-economic groups, and cultures. Approximately 800 000 suicides occur globally each year, accounting for 1.5% of all deaths. For every completed suicide, there are indications of more than 20 other attempts.[1] Considering this and that the rate is markedly higher in people with psychiatric illness,[2, 3] preventing suicide is a focus in mental healthcare. Because of the complex and heterogenous nature of suicidal behavior, fluctuating levels of suicide intent and the lack of reliable assessment tools, suicide preventive decision making is difficult.[4-6] Clinicians need to know which interventions may be helpful for the suicidal patient, and management and policy makers need to know how to organize care to provide safe preventive and recovery pathways to patients with elevated risk of suicide. Clinical actions depend not only on the competence of individual healthcare professionals, but also on patient safety management on a structural level.[7]

Previous healthcare research on suicide prevention has focused mainly on individual risk factors,[8, 9] highlighting the importance of reducing access to lethal means,[10-14] combining immediate and long-term multi-level interventions,[12, 13, 15, 16] building trustful staff-patient relationships, conducting regular assessments in outpatient settings,[17] designing safer environments for inpatients,[18, 19] and following up earlier and maintaining closer supervision in the post-discharge period.[20-27]

Post-suicide reviews commonly use root cause analysis (RCA) to identify service-related risks.[28, 29] In Sweden, RCA has been recommended for investigating adverse events in healthcare for the past 15 years.[30] Previous studies on RCA material, including systematic reviews, meta-analyses, and observational studies report inadequacies in cooperation,[25, 31-34] accessibility to care,[32]

1  
2  
3 assessments of suicidal risk,[31-33, 35] and follow-up[36] as the main root causes of suicide in  
4 healthcare.  
5

6  
7 In a study of mandatory, non-standardized post-suicide audits submitted to the Swedish Health and  
8 Social Care Inspectorate during 2015, recommendations for improvements were often single  
9 informational interventions that often did not correspond to the deficiencies they were meant to  
10 mitigate.[37] This suggests a need for patient safety research that acknowledges the complexity of  
11 the suicidal process by elucidating interactions among various factors. In the current study, we used  
12 network analysis to map and analyse interdependencies among adverse events, root causes, and  
13 recommended actions in post-suicide RCAs submitted to a national database.  
14  
15  
16  
17  
18  
19

## 20 **METHODS**

### 21 **Material**

22  
23 The analysed material consists of 217 RCA reports concerning patient suicides uploaded to the  
24 Swedish national database for RCA (NITHA) from 2012 to 2017 (search criteria: “Type of  
25 consequence: suicide/suicide attempt”; “death: yes”). Information in NITHA is anonymized, so we  
26 could not link any information to actual patient records. The RCA reports were produced by RCA  
27 teams from 12 of Sweden’s 21 regions. Data sources included interviews with healthcare  
28 professionals, interviews with relatives (64%, n = 139) and medical records.  
29  
30  
31  
32  
33  
34  
35

### 36 **Development of data collection tool and data extraction from RCA reports**

37  
38 A data collection tool was developed to organize the data into inductively constructed thematic  
39 categories. The original protocol was tested by two teams (CBC, MD and EvH, MR), and refined until  
40 consistent themes and subthemes had been identified. The team members had different  
41 professional backgrounds (two psychiatrists, one psychiatric nurse, and one psychologist) and all  
42 were experienced in performing and peer-reviewing RCAs at their own clinic. The two teams worked  
43 independently but had regular meetings to discuss and modify the data collection tool. The data  
44 collection tool was audited by external reviewers and modified several times to cover all areas of  
45 interest in the RCAs. Every modification prompted a second review of previously reviewed cases. The  
46 final version of the data collection tool was used to collect data from all 217 cases. Data were double-  
47 checked for discrepancies; none were found in the final version of the dataset.  
48  
49  
50  
51  
52  
53  
54

55  
56 All 217 RCAs were reviewed and coded by the two teams. The extracted raw data underwent an  
57 algorithm- and keyword-based sorting of text strings in Microsoft Excel 2016 before being manually  
58 distributed into the final categories. While some minor misclassifications of adverse events and root  
59  
60

causes were noted by the research teams, terminology used in the original NITHA reports was retained.

### Suicide reports in the NITHA database

Table 1 shows the distribution of demographic characteristics among the 217 patients in the RCA reports. For two persons, gender was reported as “other.” Men were slightly overrepresented. Mood disorders were recorded as the most common primary diagnoses for both sexes. Approximately half were between the ages of 18 and 49, and half were in contact with psychiatric services at time of death. The median number of days from last contact with healthcare and date of suicide was 4 days (mean 22.7 days, range 0–1124 days; data not shown).

**Table 1. Patient demographics as reported to NITHA**

|                                                                                                       | Total<br>N = 217 | Men<br>n = 125 | Women<br>n = 90 |
|-------------------------------------------------------------------------------------------------------|------------------|----------------|-----------------|
| <b>AGE</b>                                                                                            |                  |                |                 |
| 7–17                                                                                                  | 10               | 5              | 5               |
| 18–49                                                                                                 | 109              | 61             | 48              |
| 50–64                                                                                                 | 51               | 28             | 23              |
| 65–74                                                                                                 | 28               | 18             | 10              |
| 75–84                                                                                                 | 14               | 10             | 4               |
| ≥85                                                                                                   | 2                | 2              | 0               |
| Missing data                                                                                          | 3                | 1              | 0               |
| <b>PRIMARY DIAGNOSIS</b>                                                                              |                  |                |                 |
| F0-F09 Organic, including symptomatic mental disorders                                                | 2                | 2              | 0               |
| F10-F19 Mental and behavioural disorders due to psychoactive substance use                            | 11               | 9              | 2               |
| F20-F29 Schizophrenia, schizotypal, and delusional disorders                                          | 29               | 18             | 11              |
| F30-F39 Mood (affective) disorders                                                                    | 92               | 53             | 38              |
| F40-F49 Neurotic, stress-related, and somatoform disorders                                            | 22               | 10             | 12              |
| F60-F69 Disorders of adult personality and behaviour                                                  | 10               | 2              | 7               |
| F90-F98 Behavioural and emotional disorders with onset usually occurring in childhood and adolescence | 12               | 5              | 7               |
| Missing data                                                                                          | 39               | 26             | 13              |
| <b>SETTING</b>                                                                                        |                  |                |                 |
| Primary care                                                                                          | 18               | 12             | 6               |
| Psychiatry, inpatient                                                                                 | 79               | 35             | 43              |
| Psychiatry outpatient                                                                                 | 58               | 41             | 16              |
| Medicine, inpatient                                                                                   | 17               | 13             | 4               |
| Medicine, outpatient                                                                                  | 2                | 2              | 0               |
| Missing data                                                                                          | 43               | 22             | 21              |



## Construction of network and selection of measures

Based on an adjacency matrix, we synthesized an undirected network showing reciprocal connections among nodes, in which nodes were formed by categories of adverse events, root causes, and actions. Significantly correlated ( $P \leq 0.05$ ) connections to other nodes were marked by links.[38, 39] In graph theory, nodes and links are called “vertices” and “edges,” but for clarity we use the simpler terms “nodes” and “links.”

The width of the link was determined by the strength of the correlation. Although the dataset contained information about negative correlations, no such correlation was significant, so none is presented in the network.

To evaluate the connections in the network, we measured three basic values of centrality: degree, betweenness, and eigenvector scores: degree detects highly connected nodes; betweenness measures the number of times a node acts as a bridge between two adjacent nodes; and eigenvector centrality is a composite score used to perform leading eigenvector cluster analyses.[38-43]

Nodes with a combined high score in network analysis were centralized in the network. A product of frequency, degree, and betweenness was calculated to identify principal nodes (“sentinel nodes”) in each cluster. In social network analysis, eigenvectors are sometimes used to identify hubs of influential people or groups in the network. As the nodes in our network did not actively influence each other, we considered the combined score more useful for calculating sentinel nodes. When a node of a more general character (e.g., the themes *Procedures, routines, and policies; Structural changes in procedures; No/unclear action*) yielded the highest combined score, it was replaced by the subsequent node.

## Data analysis

Frequencies and percentages are reported for categorical variables. Spearman’s rho correlation coefficient tests were performed to analyse intra-correlation among nodes. We used network analysis to further examine the relationships among types of variables. Data were analysed using IBM Statistical Package for the Social Sciences version 25 and R version 3.5.0 (iGraph package version 1.2.5).

## RESULTS

### Categories of adverse events, root causes, and actions

Frequencies and percentages for identified categories of adverse events, root causes, and actions are reported in Supplement A alongside scores for degree, betweenness, and eigenvector.

In total, 499 adverse events were identified and classified under six major themes. The three most frequently reported events concerned cooperation, evaluation, and continuity. Typical cases involved patients who were referred from inpatient to outpatient services or changes in primary clinical contacts, both of which could result in missed appointments or incomplete assessments of health status. In 23 % of cases involving follow-up, healthcare planning that could have provided a framework for treatment during the transition was also lacking.

In line with the structure of the RCA protocol, contributing root causes formed five major themes (Supplement A). The most frequently reported root causes concerned poor compliance to existing guidelines (23 %), lack of guidelines that could be applied in a specific context (12 %) and lack of available resources (10 %).

In total, 700 recommended actions were identified (Supplement A). The most frequently reported actions concerned changes in routines ( $n = 403$ ) or improvements in staff education ( $n = 103$ ). Thirty-seven reports were related to changes in equipment or in the physical environment. In 51 reports, the healthcare provider suggested an action that was unclear or did not involve any actual changes. These were excluded from the final total but are displayed in the plotted network to illustrate covariance with other variables.

### Nodes and links

Figure 1 shows the 25 nodes connected in the network of major events, root causes, and recommended actions.

[PLEASE INSERT FIGURE 1 HERE]

Network analysis statistics are shown in Table 2. The graph metrics for our material show a well-connected network, with short distances between the most distal nodes. The variety in degree, betweenness and eigenvector scores indicate that while some nodes are highly connected and play a role as bridge to other nodes, some are satellites and are less significant for the entire network.

**Table 2. Statistical description of major themes**

| Type of network      | Number of themes | Mean degree | Degree centrality, range | Betweenness centrality, range | Eigenvector centrality, range |
|----------------------|------------------|-------------|--------------------------|-------------------------------|-------------------------------|
| Major themes network | 25               | 6.64        | 1–14                     | 0–88                          | 0.002–1.0                     |

### Central and peripheral nodes in the network

Node rankings are presented for degree centrality, betweenness, and eigenvector scores in Table 3.

High and low scores should be interpreted as how central or peripheral a node is in the network. Top ranked nodes represent discontinued or deficient treatment due to failed routines or ill-defined responsibilities. Low ranked nodes represent occasional failures such as missed screenings for possession of weapons, risk of violence, or need of extra monitoring. Among the lowest ranked nodes are also absent/insufficient interactions with relatives and cases in which the patient declined further contact.

**Table 3. Top and bottom ranked values of degree, betweenness, and eigenvector. Colour coding: yellow = actions; green = adverse events, pink = root causes**

A full list of ranked values of degree, betweenness, and eigenvector is provided in Supplement B.

| RANK | Node ID | Description                                       | Degree score | Node ID | Description                                       | Betweenness score | Node ID | Description                                           | Eigenvector score |
|------|---------|---------------------------------------------------|--------------|---------|---------------------------------------------------|-------------------|---------|-------------------------------------------------------|-------------------|
| 1    | ACT8    | Structural changes in procedures                  | 23           | ACT8    | Structural changes in procedures                  | 128.67            | AE10    | Deficiencies related to staffing, etc.                | 1                 |
| 2    | AE10    | Deficiencies related to staffing, etc.            | 20           | AE2     | Incomplete assessment of mental condition         | 77.17             | AE12    | Treatment not scheduled                               | 0.97              |
| 3    | AE12    | Treatment not scheduled                           | 19           | RC6     | Suboptimal work structure                         | 73.17             | ACT8    | Structural changes in procedures                      | 0.89              |
| 4    | RC16    | Lack of competence regarding documentation        | 17           | AE1     | Incomplete assessment of suicide risk             | 68.5              | RC5     | Discontinuity issues                                  | 0.71              |
| 5    | AE2     | Incomplete assessment of mental condition         | 15           | RC16    | Lack of competence regarding documentation        | 66.58             | RC4     | Routine matters, others                               | 0.67              |
| 44   | AE4     | Incomplete screening for need of extra monitoring | 3            | AE4     | Incomplete screening for need of extra monitoring | 0                 | RC10    | Insufficient communication with patients or relatives | 0.1               |
| 45   | AE11    | Patient declined contact                          | 2            | AE5     | Incomplete screening for possession of weapons    | 0                 | RC15    | Lack of competence regarding documentation            | 0.06              |

|    |      |                                                |   |      |                                                |   |      |                                                |      |
|----|------|------------------------------------------------|---|------|------------------------------------------------|---|------|------------------------------------------------|------|
| 46 | ACT9 | Alteration in patient rooms at ward            | 2 | AE11 | Patient declined contact                       | 0 | AE3  | Incomplete screening for risk of violence      | 0.04 |
| 47 | AE3  | Incomplete screening for risk of violence      | 1 | AE17 | Absent/insufficient interaction with relatives | 0 | ACT9 | Alteration in patient rooms at ward            | 0.04 |
| 48 | AE5  | Incomplete screening for possession of weapons | 1 | RC11 | Suboptimal internal communication              | 0 | AE5  | Incomplete screening for possession of weapons | 0.02 |

## Detected clusters

Cluster analysis of the major theme network based on leading eigenvectors yielded four clusters (Figure 2 and Table 4).

The largest cluster (red) represents errors that occurred between patient and caregiver, such as missed assessments or deficiencies in documentation. It is dominated by the sentinel node (A) representing evaluation.

[PLEASE INSERT FIGURE 2 HERE]

The cluster with the second largest number of connections (blue) is characterized by shortcomings in internal teamwork, also shown by the sentinel node (C) of the cluster. Recommended actions are directed towards optimizing resources and improving cooperation on an organizational level. The blue cluster also contains 30 cases in which the RCA team reported a need for further investigation.

**Table 4. Specification of nodes, shown cluster-wise. Sentinel nodes in bold.**

| RED CLUSTER n = 857  |           |                                      |            |             |           |                        |  |
|----------------------|-----------|--------------------------------------|------------|-------------|-----------|------------------------|--|
| Node ID              | Type      | Specification                        | n          | Betweenness | Degree    | n × B × D <sup>1</sup> |  |
| G                    | RC        | Procedures, routines, and policies   | 224        | 16          | 13        | 46,592                 |  |
| <b>A</b>             | <b>AE</b> | <b>Evaluation</b>                    | <b>149</b> | <b>19.5</b> | <b>12</b> | <b>34,866</b>          |  |
| I                    | RC        | Communication and information issues | 68         | 17          | 8         | 9248                   |  |
| E                    | AE        | Documentation                        | 78         | 14.5        | 7         | 7917                   |  |
| X                    | ACT       | Educate co-workers                   | 76         | 7           | 6         | 3192                   |  |
| Q                    | ACT       | New routine                          | 102        | 1           | 9         | 918                    |  |
| F                    | AE        | Relatives                            | 6          | 1           | 4         | 24                     |  |
| O                    | ACT       | Information to co-workers            | 94         | 0           | 3         | 0                      |  |
| V                    | ACT       | Update existing routine documents    | 60         | 0           | 3         | 0                      |  |
| BLUE CLUSTER n = 415 |           |                                      |            |             |           |                        |  |
| S                    | ACT       | Structural changes in procedures     | 157        | 88          | 14        | 193,424                |  |

<sup>1</sup> The combined score of frequency, betweenness and degree.

|                        |     |                                                            |     |      |    |        |
|------------------------|-----|------------------------------------------------------------|-----|------|----|--------|
| C                      | AE  | Cooperation                                                | 86  | 16.5 | 8  | 11,352 |
| H                      | RC  | Organizational issues                                      | 93  | 7.5  | 11 | 7673   |
| R                      | ACT | Optimize staffing                                          | 46  | 7.5  | 8  | 2760   |
| Z                      | ACT | Increase number of inpatient beds                          | 3   | 6    | 5  | 90     |
| Y                      | ACT | Further investigation needed                               | 30  | 0    | 3  | 0      |
| PURPLE CLUSTER n = 361 |     |                                                            |     |      |    |        |
| D                      | AE  | Follow-up, continuity, and planning                        | 171 | 12   | 10 | 20,520 |
| M                      | ACT | Further implementation of existing routine                 | 84  | 26.5 | 8  | 17808  |
| J                      | RC  | Competence and education                                   | 62  | 8    | 10 | 4960   |
| L                      | ACT | Clarifying and defining responsibilities between two units | 27  | 1.5  | 6  | 243    |
| N                      | ACT | Better information to patients and/or relatives            | 17  | 0    | 5  | 0      |
| GREEN CLUSTER n = 79   |     |                                                            |     |      |    |        |
| P                      | ACT | No/unclear action                                          | 21  | 28.5 | 4  | 2394   |
| B                      | AE  | Safety issues                                              | 9   | 43   | 3  | 1161   |
| K                      | RC  | Technical equipment and systems                            | 15  | 23.5 | 3  | 1058   |
| U                      | ACT | Update hardware or software                                | 23  | 0    | 2  | 0      |
| T                      | ACT | Alteration of patient rooms at ward                        | 11  | 0    | 1  | 0      |

A somewhat smaller cluster (purple) involves issues that occurred at the interface between two units. The sentinel node (D) represents follow-up, continuity, and healthcare planning. The actions are focused on clarifying responsibilities, but also on enhancing knowledge and providing better information to patients and relatives.

The smallest cluster (green) is dominated by safety concerns. It holds the fewest number of adverse events, root causes, and actions and includes the 21 cases in which the RCA team did not recommend any clear action.

Centralized in the network are nodes representing failed routines and suboptimal work structures (G, M, Q, and S); organizational issues and staffing (H and R); discontinued treatment (D); deficient internal and external cooperation (C); and lack of adequate competence among co-workers (J, X). Six of those nodes (C, H, J, M, S, and X) are located at the intersection between two clusters.

## DISCUSSION

The results show four patient safety domains in suicide prevention where errors may occur: (1) between patient and caregiver, (2) among co-workers in the same unit, (3) at the interface between two or more units, and (4) failed safety procedures at inpatient services. Each domain is dominated by areas of particular importance: (1) evaluation, (2) cooperation, organizational issues, structural changes in procedures, and staff optimization, (3) follow-up, continuity, and planning, and (4) safety issues.

The largest (red) cluster was dominated by the sentinel node representing evaluation. Previous RCA studies have pointed out evaluation as a salient feature, highlighting limited access to adequate assessments as a main risk factor in suicide prevention. To correct this deficiency, healthcare teams must be organized in efficient, cooperative units to ensure that suicidal patients not only receive the most immediate care at the emergency ward, but also are followed up appropriately after discharge.[32, 36]

Issues involving local structures and procedures were central features of our network analysis. This could be an artefact of the RCA framework, which regards a unit's level of patient safety as a reflection of its policies. We note, however, that similar features were identified in a previous Swedish study[37] in which only one quarter of the audits were RCA reports (E. Roos af Hjelmsäter, personal communication, 9 September 2020). This suggests that the large number of deficiencies related to routines may capture real problems in large organizational units.

The smallest (green) cluster contains 79 reported issues concerning safety aspects, technical equipment, and environmental conditions such as the design of patient rooms. Actions directed towards this area have the potential to be more stable and permanent; removed ligature points do not suddenly reappear. This contrasts with recommended actions in the other clusters, which often involve time-consuming new or improved routines that may be difficult to sustain.

Since the larger clusters more often involve multi-unit organizational factors than the smaller, more isolated clusters, it is reasonable to look beyond single deficiencies when planning future remedial interventions. Such interventions would probably also benefit from being adjusted according to the type of network and cluster the identified deficiency belongs to. For example, deficiencies in the red, blue, and purple clusters are often tied to shared responsibilities, cooperation, and communication. These are highly dependent on other factors such as social dynamics and choice of implementation strategy, and they require extensive effort to achieve fundamental change, whereas those located in

1  
2  
3 the green cluster are contained within a single unit, facilitating a more straightforward  
4 implementation.[44-46]  
5

6  
7 Nodes within the same cluster tend to co-exist, which implies that events would benefit from being  
8 investigated cluster wise. The connectivity of the network also suggests a possibility that adverse  
9 events in one area may be a consequence of deficiencies in another area. Providing suicidal patients  
10 with safe interventions, for instance, depends not only on the personal conditions of the evaluating  
11 clinician and the patient being assessed, but also on proper work structures, well-educated teams,  
12 good intrateam communication, sufficient documentation, and – perhaps most of all – effective and  
13  
14  
15  
16  
17 trusting partnerships with patients and their relatives.  
18

## 19 20 **CONCLUSION**

21 Applying network analysis to occurrences and adverse events in complex healthcare systems can  
22 elucidate patterns of associated factors and contribute to a better understanding of the mechanisms  
23 involved. Ecological studies on the local conditions within a unit affecting, or affected by, these  
24 factors may provide additional information about stability, resilience, and sources of risk in suicide  
25 prevention and other healthcare interventions.  
26  
27  
28  
29

## 30 31 **STRENGTHS AND LIMITATIONS**

32 To our knowledge, this is the first network study of data gleaned from post-suicide audits. Strengths  
33 of the study include data collected from NITHA, the only open national resource in Sweden for the  
34 dissemination of RCA reports. These reports were produced in a standardized manner by trained RCA  
35 teams, and the data were examined and categorized by four professionals, all experienced in  
36 performing and peer-reviewing RCAs.  
37  
38  
39  
40

41 The study also has several limitations. Since we obtained our data exclusively through the NITHA  
42 system, other post-suicide investigations were not included. Because regional institutional praxis  
43 concerning submission to the NITHA database varies, RCA reports cannot be considered  
44 representative for the country of Sweden. A relatively small proportion of all suicides were submitted  
45 to the database, and therefore selection bias cannot be ruled out. Moreover, since the RCA method  
46 aims to identify organizational vulnerabilities, the reports lack certain details concerning the patients  
47 themselves. Furthermore, the classification tool used by the auditing teams has not been validated  
48 by independent reviewers. The data was qualitatively categorized and could have been organized  
49 differently.  
50  
51  
52  
53  
54  
55  
56  
57  
58  
59  
60

## **FUTURE RESEARCH**

Given the innovative methodology used in this study, in-depth exploration of each cluster is required. We also suggest further studies on the longitudinal effects of actions taken and network analyses of real-world healthcare systems. Because RCAs include no follow-up information on whether recommended actions were implemented, this could also be a topic for further study using a different type of approach.

## **ACKNOWLEDGEMENTS**

The authors would like to express their gratitude towards Cecilia Boldt-Christmas, Marzia Dellepiane, and Evalena von Hausswolff who participated in the data collection.

## **CONTRIBUTORS**

MR designed the study, collected and registered the data, performed the analyses, and drafted the manuscript. EC, LA, MW, and TB contributed to the study design, analyses, and manuscript revision. All authors read and approved the final manuscript.

## **COMPETING INTERESTS**

There are no competing interests for any author

## **FUNDING**

This work was supported by the Affective Clinic, Sahlgrenska University Hospital, Gothenburg, Region Västra Götaland (no specific grant number).

## **DATA AVAILABILITY STATEMENT**

Data are available upon reasonable request.

## **PATIENT AND PUBLIC INVOLVEMENT**

Neither patients nor the public were involved in this study.

## **ETHICAL REVIEW**

According to the Swedish Act Concerning the Ethical Review of Research Involving Humans (2003:460), this study did not require ethical review as it did not involve human participants.



## REFERENCES

1. World Health Organization. Preventing suicide: a global imperative. 2014.
2. Ropper AH, Fazel S, Runeson B. Suicide. *The New England Journal of Medicine*. 2020;382(3):266-74.
3. Too LS, Spittal MJ, Bugeja L, et al. The association between mental disorders and suicide: A systematic review and meta-analysis of record linkage studies. *Journal of Affective Disorders*. 2019;259:302-13.
4. Large M, Sharma S, Cannon E, et al. Risk Factors for Suicide Within a Year of Discharge from Psychiatric Hospital: A Systematic Meta-Analysis. *Australian & New Zealand Journal of Psychiatry*. 2011;45(8):619-28.
5. Waern M, Kaiser N, Renberg ES. Psychiatrists' experiences of suicide assessment. *BMC Psychiatry, 2016, Vol 16*. 2016;16.
6. Steeg S, Quinlivan L, Nowland R, et al. Accuracy of risk scales for predicting repeat self-harm and suicide: a multicentre, population-level cohort study using routine clinical data.(Report). *BMC Psychiatry*. 2018;18(1).
7. Smith MJ, Bouch J, Bradstreet S, et al. Health services, suicide, and self-harm: patient distress and system anxiety. *The lancet Psychiatry*. 2015;2(3):275-80.
8. Cheng A, Chen T, Chen CC, et al. Psychosocial and psychiatric risk factors for suicide: case-control psychological autopsy study. *British Journal of Psychiatry*. 2000(177):360-5.
9. Berman AL, Silverman MM. Suicide Risk Assessment and Risk Formulation Part II : Suicide Risk Formulation and the Determination of Levels of Risk. *Suicide and Life-Threatening Behavior*. 2014;44(4):432-43.
10. Pirkis J, Too LS, Spittal MJ, et al. Interventions to reduce suicides at suicide hotspots: a systematic review and meta-analysis. *The lancet Psychiatry*. 2015;2(11):994-1001.

11. Barker E, Kolves K, De Leo D. Rail-suicide prevention: Systematic literature review of evidence-based activities. *Asia-Pacific Psychiatry*. 2017;9(3):e12246.
12. Zalsman G, Hawton K, Wasserman D, et al. Suicide prevention strategies revisited: 10-year systematic review. *The lancet Psychiatry*. 2016;3(7):646-59.
13. Zalsman G, Hawton K, Wasserman D, et al. Evidence-based national suicide prevention taskforce in Europe: A consensus position paper. *European Neuropsychopharmacology*. 2017;27(4):418-21.
14. Mann JJ, Apter A, Bertolote J, et al. Suicide prevention strategies: a systematic review. *Jama*. 2005;294(16):2064-74.
15. Meerwijk EL, Parekh A, Oquendo MA, et al. Direct versus indirect psychosocial and behavioural interventions to prevent suicide and suicide attempts: a systematic review and meta-analysis. *The lancet Psychiatry*. 2016;3(6):544-54.
16. Sakashita T, Oyama H. Overview of community-based studies of depression screening interventions among the elderly population in Japan. *Aging & mental health*. 2016;20(2):231-9.
17. Burgess P, Pirkis J, Morton J, et al. Lessons From a Comprehensive Clinical Audit of Users of Psychiatric Services Who Committed Suicide. *Psychiatric Services*. 2000;51(12):1555-60.
18. Large M, Smith G, Sharma S, et al. Systematic review and meta-analysis of the clinical factors associated with the suicide of psychiatric in-patients. *Acta Psychiatrica Scandinavica*. 2011;124(1):18-9.
19. Meehan J, Kapur N, Hunt I, et al. Suicide in Mental Health In-Patients and within 3 Months of Discharge. *The British Journal of Psychiatry*. 2006;188(2):129-34.
20. Iliachenko EK, Ragazan DC, Eberhard J, et al. Suicide mortality after discharge from inpatient care for bipolar disorder: A 14-year Swedish national registry study. *Journal of psychiatric research*. 2020;127:20-7.

- 1  
2  
3  
4 21. Haglund A, Lysell H, Larsson H, et al. Suicide Immediately After  
5 Discharge From Psychiatric Inpatient Care: A Cohort Study of Nearly 2.9  
6 Million Discharges. *The Journal of clinical psychiatry*. 2019;80(2).  
7  
8
- 9 22. Appleby L, Dennehy JA, Thomas CS, et al. Aftercare and clinical  
10 characteristics of people with mental illness who commit suicide: a case-  
11 control study. *The Lancet*. 1999;353(9162):1397-400.  
12  
13
- 14 23. Qin P, Nordentoft M. Suicide Risk in Relation to Psychiatric  
15 Hospitalization: Evidence Based on Longitudinal Registers. *JAMA psychiatry*.  
16 2005;62(4):427-32.  
17  
18
- 19 24. Chung D, Hadzi-Pavlovic D, Wang M, et al. Meta-analysis of  
20 suicide rates in the first week and the first month after psychiatric  
21 hospitalisation. *BMJ Open*. 2019;9(3).  
22  
23
- 24 25. Riblet VN, Shiner RB, Watts RB, et al. Death by Suicide Within 1  
25 Week of Hospital Discharge: A Retrospective Study of Root Cause Analysis  
26 Reports. *The Journal of Nervous and Mental Disease*. 2017;205(6):436-42.  
27  
28
- 29 26. Valenstein M, Kim HM, Ganoczy D, et al. Higher-risk periods for  
30 suicide among VA patients receiving depression treatment: Prioritizing suicide  
31 prevention efforts. *Journal of Affective Disorders*. 2009;112(1):50-8.  
32  
33
- 34 27. Bickley H, Hunt IM, Windfuhr K, et al. Suicide Within Two Weeks of  
35 Discharge From Psychiatric Inpatient Care: A Case-Control Study. *Psychiatric  
36 Services*. 2013;64(7):653-9.  
37  
38
- 39 28. Hoffmire C, Stephens B, Morley S, et al. VA Suicide Prevention  
40 Applications Network:A National Health Care System–Based Suicide Event  
41 Tracking System. *Public Health Reports*. 2016;131(6):816-21.  
42  
43
- 44 29. Clarke I. Learning from critical incidents. *Advances in Psychiatric  
45 Treatment*. 2018;14(6):460-8.  
46  
47
- 48 30. Swedish Association of Local Authorities and Regions.  
49 Händelseanalys & riskanalys handbok för patientsäkerhetsarbete. Stockholm:  
50 Stockholm : Sveriges kommuner och landsting; 2005.  
51  
52  
53  
54  
55  
56  
57  
58  
59  
60

- 1  
2  
3  
4 31. Mills PD, Gallimore BI, Watts BV, et al. Suicide attempts and  
5 completions in Veterans Affairs nursing home care units and long-term care  
6 facilities: a review of root-cause analysis reports. *International Journal of*  
7 *Geriatric Psychiatry*. 2016;31(5):518-25.
- 8  
9  
10  
11 32. Mills PD, Huber SJ, Vince Watts B, et al. Systemic vulnerabilities to  
12 suicide among veterans from the Iraq and Afghanistan Conflicts: review of  
13 case reports from a National Veterans Affairs Database. *Suicide Life Threat*  
14 *Behav*. 2011;41(1):21-32.
- 15  
16  
17  
18 33. Mills PD, Neily J, Luan D, et al. Actions and implementation  
19 strategies to reduce suicidal events in the Veterans Health Administration. *Jt*  
20 *Comm J Qual Patient Saf*. 2006;32(3):130-41.
- 21  
22  
23  
24 34. Aboumrad M, Shiner B, Riblet N, et al. Factors contributing to  
25 cancer-related suicide: A study of root-cause analysis reports.  
26 *Psychooncology*. 2018;27(9):2237-44.
- 27  
28  
29  
30 35. Mills PD, Watts BV, Shiner B, et al. Adverse events occurring on  
31 mental health units. *General Hospital Psychiatry*. 2018;50:63-8.
- 32  
33  
34 36. Gillies D, Chicop D, O'Halloran P. Root Cause Analyses of  
35 Suicides of Mental Health Clients. *Crisis: The Journal of Crisis Intervention*  
36 *and Suicide Prevention*. 2015;36(5):316-24.
- 37  
38  
39  
40 37. Roos af Hjelmsäter E, Ros A, Gäre BA, et al. Deficiencies in  
41 healthcare prior to suicide and actions to deal with them: a retrospective study  
42 of investigations after suicide in Swedish healthcare. *BMJ Open*.  
43 2019;9(12):e032290.
- 44  
45  
46  
47 38. Caiani M. Social Network Analysis: Oxford University Press; 2014.
- 48  
49 39. Luke DA, Dhand A, Carothers BJ. Social Network Analysis: Oxford  
50 University Press; 2017.
- 51  
52  
53 40. Pow J, Gayen K, Elliott L, et al. Understanding complex  
54 interactions using social network analysis. *Journal of clinical nursing*.  
55 2012;21(19-20):2772.
- 56  
57  
58  
59  
60

- 1  
2  
3  
4 41. Luke DA, Harris JK. Network analysis in public health: history,  
5 methods, and applications. *Annual review of public health*. 2007;28:69.  
6  
7 42. Luke DA, Harris JK. Network Analysis in Public Health: History,  
8 Methods, and Applications. *Annual Review of Public Health*. 2007;28(1):69-93.  
9  
10 43. Hansen DL, Shneiderman B, Smith MA, et al. Chapter 6 -  
11 Calculating and visualizing network metrics. In: Hansen DL, Shneiderman B,  
12 Smith MA, Himmelboim I, editors. *Analyzing Social Media Networks with*  
13 *NodeXL (Second Edition)*: Morgan Kaufmann; 2020. p. 79-94.  
14  
15 44. Wolf A, Carlström E. *Förutsättningar för omställning till*  
16 *personcentrerad vård - ledarskap, medarbetarskap och organisation*. Liber  
17 Stockholm; 2014. p. 113-26.  
18  
19 45. Greenhalgh T, Robert G, Macfarlane F, et al. Diffusion of  
20 innovations in service organizations: systematic review and recommendations.  
21 *The Milbank quarterly*. 2004;82(4):581-629.  
22  
23 46. Carlström ED, Ekman I. Organisational culture and change:  
24 implementing person-centred care. *Journal of Health Organization and*  
25 *Management*. 2012;26(2):175-91.  
26  
27  
28  
29  
30  
31  
32  
33  
34  
35  
36  
37  
38  
39  
40  
41  
42  
43  
44  
45  
46  
47  
48  
49  
50  
51  
52  
53  
54  
55  
56  
57  
58  
59  
60

# Network of major adverse events, major root causes, and planned actions

- 1
- 2
- 3 A Evaluation
- 4
- 5 B Safety issues
- 6
- 7 C Cooperation
- 8
- 9 D Follow up, continuity, and planning
- 10
- 11 E Documentation
- 12
- 13 F Relatives
- 14
- 15 G Procedures, routines, and policies
- 16
- 17 H Organizational issues
- 18
- 19 I Communication and information issues
- 20
- 21 J Competence and education
- 22
- 23 K Technical equipment and systems
- 24
- 25 L Clarifying and defining responsibilities between two units
- 26
- 27 M Further implementation of existing routine
- 28
- 29 N Better information to patients or/and relatives
- 30
- 31 O Information to co-workers
- 32
- 33 P No/unclear action
- 34
- 35 Q New routine
- 36
- 37 R Optimize staffing
- 38
- 39 S Structural changes in procedures
- 40
- 41 T Alteration of patient rooms at ward
- 42
- 43 U Update hardware or software
- 44
- 45 V Update existing routine documents
- 46
- 47
- 48
- 49
- 50
- 51
- 52
- 53
- 54
- 55
- 56
- 57
- 58
- 59
- 60
- 61
- 62
- 63
- 64
- 65
- 66
- 67
- 68
- 69
- 70
- 71
- 72
- 73
- 74
- 75
- 76
- 77
- 78
- 79
- 80
- 81
- 82
- 83
- 84
- 85
- 86
- 87
- 88
- 89
- 90
- 91
- 92
- 93
- 94
- 95
- 96
- 97
- 98
- 99
- 100
- 101
- 102
- 103
- 104
- 105
- 106
- 107
- 108
- 109
- 110
- 111
- 112
- 113
- 114
- 115
- 116
- 117
- 118
- 119
- 120
- 121
- 122
- 123
- 124
- 125
- 126
- 127
- 128
- 129
- 130
- 131
- 132
- 133
- 134
- 135
- 136
- 137
- 138
- 139
- 140
- 141
- 142
- 143
- 144
- 145
- 146
- 147
- 148
- 149
- 150
- 151
- 152
- 153
- 154
- 155
- 156
- 157
- 158
- 159
- 160
- 161
- 162
- 163
- 164
- 165
- 166
- 167
- 168
- 169
- 170
- 171
- 172
- 173
- 174
- 175
- 176
- 177
- 178
- 179
- 180
- 181
- 182
- 183
- 184
- 185
- 186
- 187
- 188
- 189
- 190
- 191
- 192
- 193
- 194
- 195
- 196
- 197
- 198
- 199
- 200
- 201
- 202
- 203
- 204
- 205
- 206
- 207
- 208
- 209
- 210
- 211
- 212
- 213
- 214
- 215
- 216
- 217
- 218
- 219
- 220
- 221
- 222
- 223
- 224
- 225
- 226
- 227
- 228
- 229
- 230
- 231
- 232
- 233
- 234
- 235
- 236
- 237
- 238
- 239
- 240
- 241
- 242
- 243
- 244
- 245
- 246
- 247
- 248
- 249
- 250
- 251
- 252
- 253
- 254
- 255
- 256
- 257
- 258
- 259
- 260
- 261
- 262
- 263
- 264
- 265
- 266
- 267
- 268
- 269
- 270
- 271
- 272
- 273
- 274
- 275
- 276
- 277
- 278
- 279
- 280
- 281
- 282
- 283
- 284
- 285
- 286
- 287
- 288
- 289
- 290
- 291
- 292
- 293
- 294
- 295
- 296
- 297
- 298
- 299
- 300

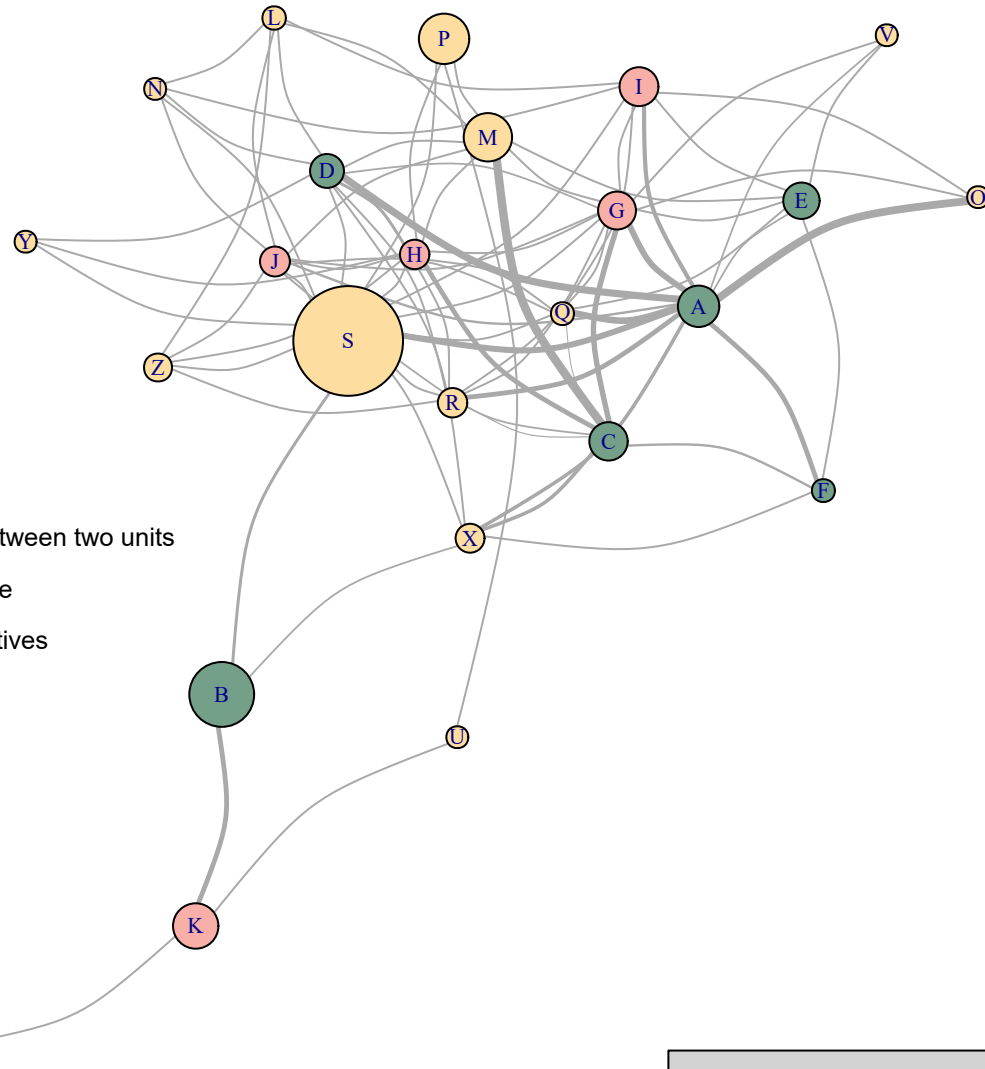

|                                       |                |
|---------------------------------------|----------------|
| <span style="color: green;">■</span>  | Adverse events |
| <span style="color: pink;">■</span>   | Root causes    |
| <span style="color: yellow;">■</span> | Actions        |

For peer review only - <http://bmjopen.bmj.com/site/about/guidelines.xhtml>

Size of nodes corresponds to traffic through the node

- 1
- 2
- 3 RED CLUSTER n = 857
- 4 A AE - Evaluation
- 5 E AE - Documentation
- 6 F AE - Relatives
- 7 G RC - Procedures, routines, and policies
- 8
- 9 RC - Communication and information issues
- 10 I ACT - Information to co-workers
- 11 Q ACT - New routine
- 12 V ACT - Update existing routine documents
- 13 X ACT - Educate co-workers
- 14
- 15
- 16
- 17 BLUE CLUSTER n = 415
- 18 C AE - Cooperation
- 19 H RC - Organizational issues
- 20 J ACT - Optimize staffing
- 21 S ACT - Structural changes in procedures
- 22 Z ACT - Further investigation needed
- 23 A ACT - Increase number of inpatient beds
- 24
- 25
- 26
- 27
- 28 PURPLE CLUSTER n = 361
- 29 L AE - Follow up, continuity, and planning
- 30 N RC - Competence and education
- 31 D ACT - Clarifying and defining responsibilities between two units
- 32 M ACT - Further implementation of existing routine
- 33 J ACT - Better information to patients or/and relatives
- 34
- 35
- 36
- 37 GREEN CLUSTER n = 79
- 38
- 39 S AE - Safety issues
- 40 R RC - Technical equipment and systems
- 41 I ACT - No/unclear action
- 42 T ACT - Alteration of patient rooms at ward
- 43 U ACT - Update hardware or software
- 44
- 45
- 46

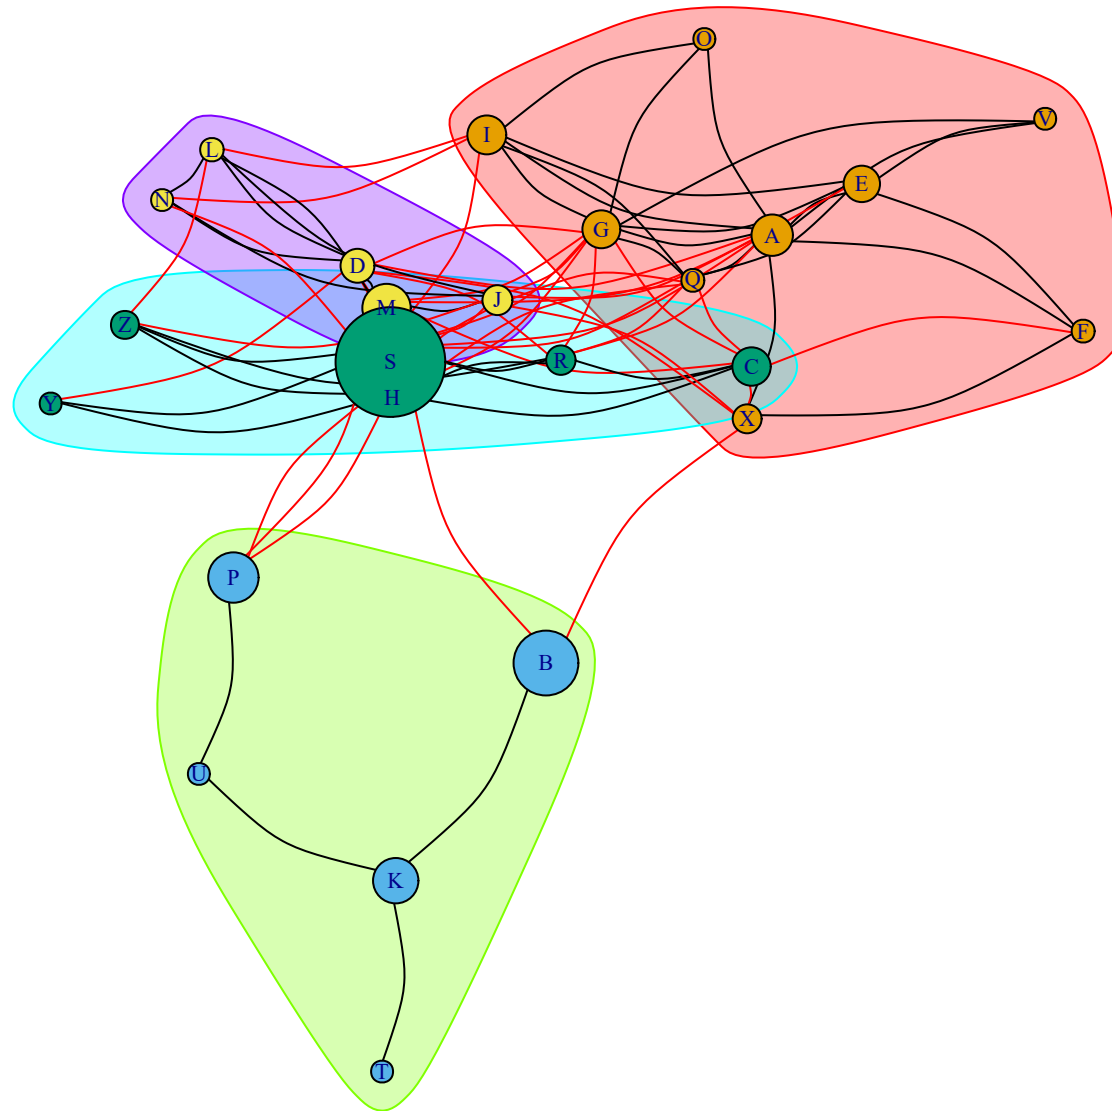



1  
2  
3  
4  
5  
6  
7  
8  
9  
10  
11  
12  
13  
14  
15  
16  
17  
18  
19  
20  
21  
22  
23  
24  
25  
26  
27  
28  
29  
30  
31  
32  
33  
34  
35  
36  
37  
38  
39  
40  
41  
42  
43  
44  
45  
46  
47  
48  
49  
50  
51  
52  
53  
54  
55  
56  
57  
58  
59  
60

| Adverse events n=499 |                                               |                                                                                                                   |                                                   |                   | Root causes n = 462 |             |             |         |                                              | Actions n = 700                                         |                                             |                                    |                   |             |                       |                                                      |                                                             |                              |       |             |             |     |  |
|----------------------|-----------------------------------------------|-------------------------------------------------------------------------------------------------------------------|---------------------------------------------------|-------------------|---------------------|-------------|-------------|---------|----------------------------------------------|---------------------------------------------------------|---------------------------------------------|------------------------------------|-------------------|-------------|-----------------------|------------------------------------------------------|-------------------------------------------------------------|------------------------------|-------|-------------|-------------|-----|--|
| Node ID              | Major theme                                   | Description                                                                                                       | Subtheme                                          | Frequencies n (%) | Drugs               | Betweenness | Eigenvector | Node ID | Major theme                                  | Subtheme                                                | Frequencies n (%)                           | Drugs                              | Betweenness       | Eigenvector | Node ID               | Theme                                                | Description                                                 | Frequencies n (%)            | Drugs | Betweenness | Eigenvector |     |  |
| D                    | Follow-up, continuity, and planning (n = 372) | Planning medical and non-medical treatment, health care, related problems and continuity issues                   | Treatment not scheduled                           | 72 (14 %)         | 19                  | 0.2         | 0.07        | G       | Procedures, routines, and policies (n = 238) | Lack of discipline in existing routine                  | 107 (23 %)                                  | 14                                 | 0.33              | 0.52        | S                     | Structural changes in procedures                     | Structural changes                                          | 127 (22%)                    | 23    | 0.67        | 0.88        |     |  |
|                      |                                               |                                                                                                                   | Deficiencies in staffing, etc.                    | 40 (8 %)          | 12                  | 0.25        | 0.49        |         |                                              | Q                                                       | New routine (n = 102)                       | Introducing a new routine          | 102 (15%)         | 12          | 0.1                   | 0.12                                                 |                                                             |                              |       |             |             |     |  |
|                      |                                               |                                                                                                                   | No follow-up provided by main caregiver           | 17 (3 %)          | 11                  | 0.1         | 0.54        |         |                                              | O                                                       | Information to coworkers (n = 94)           | Information to coworkers           | 94 (13%)          | 8           | 0.24                  | 0.21                                                 |                                                             |                              |       |             |             |     |  |
| A                    | Evaluation (n = 148)                          | Evaluating and assessing general of overall state and suicide risk                                                | Suboptimal assessment of suicide risk             | 77 (15 %)         | 12                  | 0.65        | 0.38        | H       | Organizational issues (n = 95)               | Suboptimal work structure                               | 22 (5 %)                                    | 14                                 | 0.33              | 0.71        | M                     | Further implementation of existing routine (n = 84)  | Implementation of already existing routine                  | 84 (12%)                     | 13    | 0.45        | 0.63        |     |  |
|                      |                                               |                                                                                                                   | Lack of available resources                       | 73 (14 %)         | 15                  | 0.73        | 0.55        |         |                                              | V                                                       | Update existing routine                     | Update existing routine            | 60 (9%)           | 5           | 0.1                   | 0.11                                                 |                                                             |                              |       |             |             |     |  |
| C                    | Cooperation (n = 84)                          | External or internal cooperation and changes of shared resources such as staffing, hardware, software, or space   | Unclear definition of responsibility              | 79 (16 %)         | 9                   | 0.67        | 0.28        | I       | Communication and information (n = 48)       | Suboptimal communication in internal unit               | 28 (6 %)                                    | 11                                 | 0.27              | 0.43        | R                     | Educate coworkers (n = 76)                           | Improving education                                         | 76 (11%)                     | 11    | 0.88        | 0.35        |     |  |
|                      |                                               |                                                                                                                   | Suboptimal internal                               | 7 (1 %)           | 5                   | 0.5         | 0.16        |         |                                              | U                                                       | Updating hardware or software (n = 25)      | Updating hardware or software      | 25 (4%)           | 5           | 0.16                  | 0.16                                                 |                                                             |                              |       |             |             |     |  |
| E                    | Documentation (n = 78)                        | Shortfalling, discrepancies in documentation and transfer of information                                          | Assessment not recorded                           | 41 (8 %)          | 12                  | 0.25        | 0.36        | J       | Competence and education (n = 41)            | Suboptimal communication in patient or patient's family | 10 (2 %)                                    | 5                                  | 0.5               | 0.1         | N                     | Improving information patient and relatives (n = 17) | Making changes in information from the patient or relatives | 17 (2%)                      | 13    | 0.27        | 0.51        |     |  |
|                      |                                               |                                                                                                                   | Suboptimal transfer of information                | 37 (7 %)          | 5                   | 0.75        | 0.14        |         |                                              | T                                                       | Altering patient rooms on the ward (n = 11) | Altering patient rooms on the ward | 11 (2%)           | 2           | 0.04                  | 0.04                                                 |                                                             |                              |       |             |             |     |  |
| B                    | Safety issues (n = 78)                        | Assessing risk of violence, need for extra monitoring, or possession of weapons, confiscation of means of suicide | Incomplete screening of means of suicide          | 2 (0.4 %)         | 7                   | 0.03        | 0.27        | K       | Technical equipment and systems (n = 15)     | Communication, other                                    | 3 (0.7 %)                                   | 8                                  | 0.55              | 0.28        | not included in total | Y                                                    | ICT11                                                       | Further investigation needed | 30    | 0           | 0.5         | 0.4 |  |
|                      |                                               |                                                                                                                   | Incomplete screening for risk of violence         | 3 (0.6 %)         | 1                   | 0           | 0.04        |         |                                              | not included in total                                   | P                                           | ACT5                               | No/unclear action | 21          | 8                     | 0.1                                                  | 0.11                                                        |                              |       |             |             |     |  |
|                      |                                               |                                                                                                                   | Incomplete screening of need for extra monitoring | 2 (0.4 %)         | 3                   | 0           | 0.12        |         |                                              | not included in total                                   |                                             |                                    |                   |             |                       |                                                      |                                                             |                              |       |             |             |     |  |
| F                    | Relatives (n = 4)                             | Engaging relatives in the patient's care                                                                          | Incomplete screening for use of drugs             | 1 (0.2 %)         | 4                   | 1           | 0.38        |         |                                              | Competence, basic, others                               | 12 (2 %)                                    | 17                                 | 0.58              | 0.6         |                       |                                                      |                                                             |                              |       |             |             |     |  |
|                      |                                               |                                                                                                                   | Nonrecognition of interaction with relatives      | 0 (0 %)           | 0                   | 0           | 0.13        |         |                                              | Suboptimal design of devices or systems                 | 15 (3 %)                                    | 5                                  | 2                 | 0.14        |                       |                                                      |                                                             |                              |       |             |             |     |  |

For peer review only



| RANK | Node ID | Description                                                      | Degree score | Node ID | Description                                                     | Betweenness score | Node ID | Description                                                     | Eigenvector score |
|------|---------|------------------------------------------------------------------|--------------|---------|-----------------------------------------------------------------|-------------------|---------|-----------------------------------------------------------------|-------------------|
| 1    | ACT8    | Structural changes in procedures                                 | 23           | ACT8    | Structural changes in procedures                                | 128.67            | AE10    | Deficiencies related to staffing, etc.                          | 1                 |
| 2    | AE10    | Deficiencies related to staffing, etc.                           | 20           | AE2     | Incomplete assessment of mental condition                       | 77.17             | AE12    | Treatment not scheduled                                         | 0.97              |
| 3    | AE12    | Treatment not scheduled                                          | 19           | RC6     | Suboptimal work structure                                       | 73.17             | ACT8    | Structural changes in procedures                                | 0.89              |
| 4    | RC16    | Lack of competence regarding documentation                       | 17           | AE1     | Incomplete assessment of suicide risk                           | 68.5              | RC5     | Discontinuity issues                                            | 0.71              |
| 5    | AE2     | Incomplete assessment of mental condition                        | 15           | RC16    | Lack of competence regarding documentation                      | 66.58             | RC4     | Routine matters, other                                          | 0.67              |
| 6    | RC2     | Lack of applicable routine                                       | 15           | AE12    | Treatment not scheduled                                         | 62                | RC13    | Lack of competence regarding medical condition or level of risk | 0.64              |
| 7    | RC4     | Routine matters, others                                          | 15           | AE15    | Assessment not recorded                                         | 59.25             | RC2     | Lack of applicable routine                                      | 0.63              |
| 8    | RC6     | Suboptimal work structure                                        | 15           | RC7     | Lack of available resources                                     | 56.25             | ACT2    | Further implementation of existing routine                      | 0.63              |
| 9    | RC1     | Lack of compliance to existing routine                           | 14           | AE8     | Unclear definition of responsibility                            | 55.67             | RC16    | Lack of competence regarding documentation                      | 0.6               |
| 10   | RC5     | Discontinuity issues                                             | 14           | AE14    | Deficiencies related to healthcare plan                         | 51.25             | ACT7    | Optimizing staffing                                             | 0.59              |
| 11   | RC13    | Lack of competence regarding medical condition or level of risk  | 14           | RC1     | Lack of compliance to existing routine                          | 45.33             | RC6     | Suboptimal work structure                                       | 0.59              |
| 12   | ACT2    | Further implementation of existing routine                       | 13           | RC2     | Lack of applicable routine                                      | 41.33             | AE2     | Incomplete assessment of mental condition                       | 0.55              |
| 13   | ACT3    | Better information to patients or/and relatives                  | 13           | RC4     | Routine matters, others                                         | 39                | AE13    | No follow up provided by next caregiver                         | 0.54              |
| 14   | ACT7    | Optimize staffing                                                | 13           | ACT12   | Educating coworkers                                             | 38.83             | ACT3    | Better information to patients or/and relatives                 | 0.53              |
| 15   | AE1     | Incomplete assessment of suicide risk                            | 12           | ACT7    | Optimizing staffing                                             | 36.5              | RC1     | Lack of compliance to existing routine                          | 0.52              |
| 16   | AE14    | Deficiencies related to healthcare plan                          | 12           | ACT2    | Further implementation of existing routine                      | 34.5              | ACT6    | New routine                                                     | 0.52              |
| 17   | AE15    | Assessment not recorded                                          | 12           | RC12    | Communication, other                                            | 33.5              | AE14    | Deficiencies related to healthcare plan                         | 0.49              |
| 18   | RC7     | Lack of available resources                                      | 12           | RC3     | Existing routine is incomplete                                  | 28.83             | RC7     | Lack of available resources                                     | 0.47              |
| 19   | ACT6    | New routine                                                      | 12           | RC8     | Suboptimal communication w. external unit                       | 27                | RC8     | Suboptimal communication w. external unit                       | 0.43              |
| 20   | AE13    | No follow-up provided by next caregiver                          | 11           | ACT3    | Better information to patients or/and relatives                 | 27                | ACT1    | Clarifying and defining responsibilities between two units      | 0.42              |
| 21   | RC8     | Suboptimal communication w. external unit                        | 11           | ACT4    | Information to coworkers                                        | 24.5              | ACT13   | Further investigation                                           | 0.4               |
| 22   | ACT12   | Education of coworkers                                           | 11           | AE10    | Deficiencies related to staffing etc.                           | 23.92             | AE1     | Incomplete assessment of suicide risk                           | 0.38              |
| 23   | AE8     | Unclear definition of responsibilities                           | 9            | ACT13   | Further investigation                                           | 19.5              | AE15    | Assessment not recorded                                         | 0.36              |
| 24   | RC3     | Existing routine is incomplete                                   | 9            | RC13    | Lack of competence regarding medical condition or level of risk | 17                | ACT12   | Educating coworkers                                             | 0.35              |
| 25   | ACT1    | Clarifying and defining responsibilities between different units | 9            | AE6     | Incomplete screening of means of suicide                        | 14.33             | AE7     | Incomplete screening for use of drugs                           | 0.33              |
| 26   | ACT13   | Further investigation                                            | 9            | ACT14   | ACT14                                                           | 14                | RC11    | Suboptimal internal communication                               | 0.32              |
| 27   | RC12    | Communication, other                                             | 8            | RC5     | Discontinuity issues                                            | 13.33             | ACT5    | No/unclear action                                               | 0.31              |

|    |       |                                                                  |   |       |                                                                  |       |       |                                                                  |      |
|----|-------|------------------------------------------------------------------|---|-------|------------------------------------------------------------------|-------|-------|------------------------------------------------------------------|------|
| 28 | RC14  | Lack of competence regarding juridical or organizational matters | 8 | AE16  | Suboptimal transfer of information                               | 10.75 | ACT14 | Increase in inpatient beds                                       | 0.31 |
| 29 | ACT4  | Information to coworkers                                         | 8 | RC14  | Lack of competence regarding juridical or organizational matters | 10.33 | RC3   | Existing routine incomplete                                      | 0.3  |
| 30 | ACT5  | No/unclear action                                                | 8 | RC15  | Lack of competence regarding documentation                       | 10    | AE8   | Unclear definition of responsibility                             | 0.28 |
| 31 | AE6   | Incomplete screening of means of suicide                         | 7 | ACT11 | Update existing routine documents                                | 9     | RC12  | Communication, other                                             | 0.28 |
| 32 | ACT14 | Increase in inpatient beds                                       | 7 | AE13  | No follow up provided by next caregiver                          | 8     | RC14  | Lack of competence regarding juridical or organizational matters | 0.28 |
| 33 | AE7   | Incomplete screening for use of drugs                            | 6 | ACT6  | New routine                                                      | 8     | AE6   | Incomplete screening for means of suicide                        | 0.27 |
| 34 | RC9   | Communication, administrative matters                            | 6 | RC10  | Insufficient communication w. patients or relatives              | 7.5   | AE11  | Patient declined contact                                         | 0.22 |
| 35 | RC11  | Suboptimal internal communication                                | 6 | ACT1  | Clarity responsibility and delimitation between two units        | 6     | ACT4  | Information to coworkers                                         | 0.21 |
| 36 | AE9   | Suboptimal internal cooperation                                  | 5 | ACT5  | No/unclear action                                                | 6     | RC9   | Communication, administrative matters                            | 0.19 |
| 37 | AE16  | Suboptimal transfer of information                               | 5 | ACT10 | Update hardware or software                                      | 5     | AE9   | Suboptimal internal cooperation                                  | 0.16 |
| 38 | RC10  | Insufficient communication w. patients or relatives              | 5 | AE9   | Suboptimal internal cooperation                                  | 3.5   | ACT10 | Updating hardware or software                                    | 0.16 |
| 39 | RC17  | Malfunctional design of devices or rooms                         | 5 | RC9   | Communication, administrative matters                            | 2     | RC17  | Malfunctional design of devices or rooms                         | 0.14 |
| 40 | ACT10 | Updating hardware or software                                    | 5 | RC17  | Malfunctional design of devices or rooms                         | 2     | AE16  | Suboptimal transfer of information                               | 0.14 |
| 41 | ACT11 | Updating existing routine documents                              | 5 | ACT9  | Alteration in patient rooms at ward                              | 2     | ACT11 | Updating existing routine documents                              | 0.13 |
| 42 | AE17  | Absent/insufficient interaction with relatives                   | 4 | AE7   | Incomplete screening for use of drugs                            | 1     | AE17  | Absent/insufficient interaction with relatives                   | 0.13 |
| 43 | RC15  | Lack of competence regarding documentation                       | 4 | AE3   | Incomplete screening for violence risk                           | 0     | AE4   | Incomplete screening for need of extra monitoring                | 0.12 |
| 44 | AE4   | Incomplete screening for need of extra monitoring                | 3 | AE4   | Incomplete screening for need of extra monitoring                | 0     | RC10  | Insufficient communication w. patients or relatives              | 0.1  |
| 45 | AE11  | Patient declined contact                                         | 2 | AE5   | Incomplete screening for possession of weapons                   | 0     | RC15  | Lack of competence regarding documentation                       | 0.06 |
| 46 | ACT9  | Alteration in patient rooms on the ward                          | 2 | AE11  | Patient has declined contact                                     | 0     | AE3   | Incomplete screening for risk of violence                        | 0.04 |
| 47 | AE3   | Incomplete screening for risk of violence                        | 1 | AE17  | Absent/insufficient interaction with relatives                   | 0     | ACT9  | Alteration in patient rooms at ward                              | 0.04 |
| 48 | AE5   | Incomplete screening for possession of weapons                   | 1 | RC11  | Suboptimal internal communication                                | 0     | AE5   | Incomplete screening for possession of weapons                   | 0.02 |

# BMJ Open

## Coexisting service related factors preceding suicide: a network analysis

|                                 |                                                                                                                                                                                                                                                                                                                                                                                                                                                                                                                                                                                                                                                                                                                                                   |
|---------------------------------|---------------------------------------------------------------------------------------------------------------------------------------------------------------------------------------------------------------------------------------------------------------------------------------------------------------------------------------------------------------------------------------------------------------------------------------------------------------------------------------------------------------------------------------------------------------------------------------------------------------------------------------------------------------------------------------------------------------------------------------------------|
| Journal:                        | <i>BMJ Open</i>                                                                                                                                                                                                                                                                                                                                                                                                                                                                                                                                                                                                                                                                                                                                   |
| Manuscript ID                   | bmjopen-2021-050953.R1                                                                                                                                                                                                                                                                                                                                                                                                                                                                                                                                                                                                                                                                                                                            |
| Article Type:                   | Original research                                                                                                                                                                                                                                                                                                                                                                                                                                                                                                                                                                                                                                                                                                                                 |
| Date Submitted by the Author:   | 01-Nov-2021                                                                                                                                                                                                                                                                                                                                                                                                                                                                                                                                                                                                                                                                                                                                       |
| Complete List of Authors:       | Rex, Malin; University of Gothenburg, Institute of Health and Care Sciences, Sahlgrenska Academy; Sahlgrenska University Hospital, Affective clinic<br>Brezicka, Thomas; Sahlgrenska University Hospital, Department for quality and patient safety<br>Carlström, Eric; University of Gothenburg, Institute of Health and Care Sciences, Sahlgrenska Academy; University of Gothenburg, Centre for Person-Centred Care (GPCC)<br>Waern, Margda; University of Gothenburg, Institute of Neuroscience and Physiology, Sahlgrenska Academy; Sahlgrenska University Hospital, Psychosis Clinic<br>Ali, Lilas; University of Gothenburg, Institute of Health and Care Sciences, Sahlgrenska Academy; Sahlgrenska University Hospital, Affective Clinic |
| <b>Primary Subject Heading</b>: | Mental health                                                                                                                                                                                                                                                                                                                                                                                                                                                                                                                                                                                                                                                                                                                                     |
| Secondary Subject Heading:      | Mental health                                                                                                                                                                                                                                                                                                                                                                                                                                                                                                                                                                                                                                                                                                                                     |
| Keywords:                       | Suicide & self-harm < PSYCHIATRY, PSYCHIATRY, Risk management < HEALTH SERVICES ADMINISTRATION & MANAGEMENT, Quality in health care < HEALTH SERVICES ADMINISTRATION & MANAGEMENT, Health & safety < HEALTH SERVICES ADMINISTRATION & MANAGEMENT, Organisational development < HEALTH SERVICES ADMINISTRATION & MANAGEMENT                                                                                                                                                                                                                                                                                                                                                                                                                        |
|                                 |                                                                                                                                                                                                                                                                                                                                                                                                                                                                                                                                                                                                                                                                                                                                                   |

SCHOLARONE™  
Manuscripts



I, the Submitting Author has the right to grant and does grant on behalf of all authors of the Work (as defined in the below author licence), an exclusive licence and/or a non-exclusive licence for contributions from authors who are: i) UK Crown employees; ii) where BMJ has agreed a CC-BY licence shall apply, and/or iii) in accordance with the terms applicable for US Federal Government officers or employees acting as part of their official duties; on a worldwide, perpetual, irrevocable, royalty-free basis to BMJ Publishing Group Ltd ("BMJ") its licensees and where the relevant Journal is co-owned by BMJ to the co-owners of the Journal, to publish the Work in this journal and any other BMJ products and to exploit all rights, as set out in our [licence](#).

The Submitting Author accepts and understands that any supply made under these terms is made by BMJ to the Submitting Author unless you are acting as an employee on behalf of your employer or a postgraduate student of an affiliated institution which is paying any applicable article publishing charge ("APC") for Open Access articles. Where the Submitting Author wishes to make the Work available on an Open Access basis (and intends to pay the relevant APC), the terms of reuse of such Open Access shall be governed by a Creative Commons licence – details of these licences and which [Creative Commons](#) licence will apply to this Work are set out in our licence referred to above.

Other than as permitted in any relevant BMJ Author's Self Archiving Policies, I confirm this Work has not been accepted for publication elsewhere, is not being considered for publication elsewhere and does not duplicate material already published. I confirm all authors consent to publication of this Work and authorise the granting of this licence.

# Coexisting service related factors preceding suicide: a network analysis

Malin Rex<sup>1,2</sup>, Thomas Brezicka<sup>4</sup>, Eric Carlström<sup>1,3</sup>, Margda Waern<sup>5,6</sup>, Lilas Ali<sup>1,2</sup>.

<sup>1</sup> University of Gothenburg, Institute of Health and Care Sciences, Sahlgrenska Academy Gothenburg, Region Västra Götaland, Sweden

<sup>2</sup> Sahlgrenska University Hospital, Affective clinic Gothenburg, Region Västra Götaland, Sweden

<sup>3</sup> University of Gothenburg, Centre for Person-Centred Care (GPCC) Gothenburg, Region Västra Götaland, Sweden

<sup>4</sup> Sahlgrenska University Hospital, Department for quality and patient safety Gothenburg, Region Västra Götaland, Sweden

<sup>5</sup> University of Gothenburg, Institute of Neuroscience and Physiology, Sahlgrenska Academy Gothenburg, Region Västra Götaland, Sweden

<sup>6</sup> Sahlgrenska University Hospital, Psychosis Clinic Gothenburg, Region Västra Götaland, Sweden

Correspondence to: Malin Rex

## POSTAL ADDRESS

University of Gothenburg, Institute of Health and Care Sciences  
Box 457  
405 30 Göteborg, Sweden

malin.rex@gu.se

+46-761199908

Keywords: Suicide, Patient safety, Network Analysis, Psychiatry, Mood disorders, Self-Injurious Behavior

## ABSTRACT

### Objectives

The overall objective of this paper was to analyse service related factors involved in the complex processes that precede suicide in order to identify potential targets for intervention.

### Design and setting

Explorative network analysis study of post-suicide root cause analysis data from Swedish primary and secondary healthcare.

## Participants

217 suicide cases reported to the Swedish national root cause analysis database between 2012 and 2017.

## Primary and secondary outcome measures

A total of 961 reported incidents were included. Demographic data and frequencies of reported deficiencies were registered. Topology, centrality indices and communities were explored for three networks. All networks have been tested for robustness and accuracy.

## Results

Lack of follow-up, evaluations, and insufficient documentation issues emerged as central deficiencies in the network of major themes, along with the contributing factors representing organizational problems, failing procedures and miscommunication. When analysing the subthemes of deficiencies more closely, disrupted treatments and staffing issues emerged as prominent features. The network covering the subthemes of contributing factors also highlighted discontinuity, fragile work structures, inadequate routines, and lack of resources and relevant competence as potential triggers. However, as the correlation stability coefficients for this network were low, no final conclusions could be drawn. Four communities were detected covering nodes for follow-up, evaluation, cooperation, and procedures; communication, documentation and organization; assessments of suicide risk and psychiatric status; and staffing, missed appointments and declined treatment.

## Conclusion

The results of this study suggest that healthcare providers may improve patient safety in suicide preventive pathways by taking active measures to provide regular follow-ups to patients with elevated suicide risk. In some cases, declined or cancelled appointments could be a warning sign. Tentative results show organizational stability, in terms of work structure, resources and staffing, as a potential target for intervention, although this must be more extensively explored in the future.

## SUMMARY - STRENGTHS AND LIMITATIONS OF THIS STUDY

- This adds a new angle to previous research of deficiencies reported in post-suicide audits where frequencies, but no interrelationships among variables have been known.
- While previous network studies in suicidology have focused on symptoms associated with suicidal ideation, this paper covers potential organizational targets for improving suicide prevention.
- The data source (The national open database for root cause analysis) was based on standardized reports performed by trained healthcare teams.
- The main limitation is that a relatively small proportion of all suicides were submitted to the database.

## BACKGROUND

Suicide is one of the leading causes of death worldwide, affecting people of all ages, socio-economic groups, and cultures. More than 700 000 suicides (1.3 % of all deaths) occur globally each year, which exceeds the deaths due to malaria, HIV/AIDS, breast cancer, war and homicide. [1] For every completed suicide, there are indications of more than 20 other attempts.[2] Considering this and that the rate is markedly higher in people with psychiatric illness,[3-5] preventing suicide is a general priority in mental healthcare. Due to the complex and heterogenous nature of suicidal behavior, fluctuating levels of suicide intent and the lack of reliable assessment tools, suicide preventive decision making is difficult.[6-8] Clinical actions depend not only on the competence of individual healthcare professionals, but also on patient safety management on a structural level.[9]

Post-suicide reviews commonly use root cause analysis (RCA) to identify service related risks.[10, 11] In Sweden, RCA has been a widespread method for investigating adverse events in healthcare for more than 15 years. The analyses are performed according to a standardized protocol by trained teams.[12] The RCA procedure has been exhaustively described elsewhere, [11, 13, 14] and the workflow of the Swedish RCA teams is identical to the steps listed there.[12] A short summary of the history of incident reporting and patient safety legislation in Sweden can be found in Fröding et al, (2021).[15]

Network analysis is an approach to statistically analyse and visualize core elements of a data set that has found applications in various fields spanning from mathematics and physics, to social sciences and psychology. The method is useful for modelling complex patterns of mutual, reinforcing relationships among positively correlated variables.[16, 17] Over the last decade, a wide array of studies within the field of personality, psychopathology, and comorbidity has taken place.[16, 18-37]

## Previous research

Previous healthcare research on suicide prevention has focused mainly on single risk factors.[38, 39] Besides highlighting the importance providing treatment to underlying illness, it stresses the of reduction of accessibility to lethal means,[40-45] combining immediate and long-term multi-level interventions,[42, 43, 46, 47] building trustful staff–patient relationships and involving relatives,[48-50] conducting regular assessments in outpatient settings,[49, 51, 52] designing safer environments for inpatients,[53-56] following up earlier and maintaining closer supervision in the post-discharge period.[57-66] To reduce organizational risk factors, better communication among professionals, proper education and provision of adequate guidelines have been suggested.[15, 49, 52]

Previous studies based exclusively on post-suicide RCA material, including systematic reviews, meta-analyses, and observational studies report inadequacies in cooperation,[62, 67-70] accessibility to care,[45, 68] assessments of suicidal risk,[67-71] and follow-up[72] as the main deficiencies in suicide prevention.

Network analysis has been used to examine and model suicidal behaviour, motives and psychopathology associated with suicidal ideation. According to the results, suboptimal treatment of underlying depression, affect regulation [73-79], or of psychotic symptoms [80] are associated with increased levels of suicidal ideation. Feelings of thwarted belongingness,[74, 75] and internal motives such as entrapment, hopelessness, and perceived burdensomeness[75, 77, 79, 81, 82] are also core factors of self-harm and suicidality. Physical illness, trauma, harassment and acute life stress due to economic or relational circumstances are examples of external individual factors associated with suicidal ideation.[76, 82, 83] Personalizing treatment strategies, for instance by using electronic devices for repeated ecological momentary assessment, have been suggested as an application of these findings.[73, 75]

Network studies on service related risk factors for suicides among persons in contact with health services are lacking. Therefore, this study aims to explore relationships of common service related deficiencies preceding suicide, identify potential targets for clinical intervention and generate hypotheses for future research.

## METHODS

This study followed the guidelines of the STROBE (Strengthening the Reporting of Observational Studies in Epidemiology) checklist for reporting cross sectional studies (Supplement A).



## Material

The analysed material consists of 217 RCA reports concerning patient suicides uploaded to the Swedish national database for RCA (Nationellt IT-stöd för HändelseAnalyser - NITHA) from 2012 to 2017 (The search criteria were: "Type of consequence: suicide/suicide attempt"; "death: yes").[84] Information in NITHA is anonymized, so we could not link any information to actual patient records. The RCA reports were produced by RCA teams from 12 of Sweden's 21 regions, and covered suicides which have occurred among patients who were in contact with the healthcare services at the time of death. The RCA teams typically consisted of 3-4 investigators who had received special training in the RCA methodology. The investigators were responsible for data collection, identifying deficiencies, listing possible contributing factors, and proposing and evaluating adequate actions to avoid future recurrences. The data were collected from all data sources available to the RCA team at the time of the investigation, including medical records, information from booking systems, data from external service settings, and qualitative data, such as interviews with healthcare professionals and interviews with relatives (64%, n = 139). The final RCA reports reflect the variability of data accessibility among the RCA teams. In some of the reports, particular details about the medical condition or specific circumstances have been omitted. Although we do not know the exact background to this, it may have been done to protect the integrity of those deceased, as suicides are relatively rare and single cases in rural areas could accidentally be identifiable by descriptions becoming too precise. As we only had access to the final RCA reports, we have not been able to scrutinize how the RCA teams processed the original raw data.

### Suicide reports in the NITHA database

Table 1 shows the distribution of demographic characteristics among the 217 patients in the RCA reports. For two persons, gender was reported as "other." Men were slightly overrepresented. Mood disorders were recorded as the most common type of primary diagnosis for both sexes.

Approximately half were between the ages of 18 and 49, and half were in contact with psychiatric services at time of death. Mood disorders were recorded as the most common type of primary diagnosis for both sexes.

**Table 1. Patient demographics as reported to NITHA**

|                                                                              | Total<br>N = 217            | Men<br>n = 125 | Women<br>n = 90 |
|------------------------------------------------------------------------------|-----------------------------|----------------|-----------------|
| <b>NUMBER OF DAYS SINCE LAST CONTACT WITH HEALTHCARE AND DATE OF SUICIDE</b> |                             |                |                 |
| Mean<br>(Median) ± SD                                                        | 22.7<br>(4) ±91<br>[0-1124] |                |                 |

| [Min - Max]                                                                                           |     |    |    |
|-------------------------------------------------------------------------------------------------------|-----|----|----|
| <b>AGE</b>                                                                                            |     |    |    |
| 7–17                                                                                                  | 10  | 5  | 5  |
| 18–49                                                                                                 | 109 | 61 | 48 |
| 50–64                                                                                                 | 51  | 28 | 23 |
| 65–74                                                                                                 | 28  | 18 | 10 |
| 75–84                                                                                                 | 14  | 10 | 4  |
| ≥85                                                                                                   | 2   | 2  | 0  |
| Missing data                                                                                          | 3   | 1  | 0  |
| <b>PRIMARY DIAGNOSIS</b>                                                                              |     |    |    |
| F0-F09 Organic, including symptomatic mental disorders                                                | 2   | 2  | 0  |
| F10-F19 Mental and behavioural disorders due to psychoactive substance use                            | 11  | 9  | 2  |
| F20-F29 Schizophrenia, schizotypal, and delusional disorders                                          | 29  | 18 | 11 |
| F30-F39 Mood (affective) disorders                                                                    | 92  | 53 | 38 |
| F40-F49 Neurotic, stress-related, and somatoform disorders                                            | 22  | 10 | 12 |
| F60-F69 Disorders of adult personality and behaviour                                                  | 10  | 2  | 7  |
| F90-F98 Behavioural and emotional disorders with onset usually occurring in childhood and adolescence | 12  | 5  | 7  |
| Missing data                                                                                          | 39  | 26 | 13 |
| <b>SETTING</b>                                                                                        |     |    |    |
| Primary care                                                                                          | 18  | 12 | 6  |
| Psychiatry, inpatient                                                                                 | 79  | 35 | 43 |
| Psychiatry outpatient                                                                                 | 58  | 41 | 16 |
| Medicine, inpatient                                                                                   | 17  | 13 | 4  |
| Medicine, outpatient                                                                                  | 2   | 2  | 0  |
| Missing data                                                                                          | 43  | 22 | 21 |

## Data extraction and processing

A data coding tool was developed to organize the data into inductively constructed thematic categories. The original protocol was tested by two teams (CBC, MD and EvH, MR), and refined until consistent themes and subthemes had been identified. The team members had different professional backgrounds (two psychiatrists, one psychiatric nurse, and one psychologist) and all were experienced in performing and peer-reviewing RCA reports at their own clinic. The teams worked independently but had regular meetings to discuss and modify the data coding tool. The data coding tool was audited by external reviewers and modified several times to cover all areas of interest in the RCAs. Every modification prompted a second review of previously reviewed cases. The

1  
2  
3 final version of the data coding tool was used to derive data from all 217 cases. Data were double-  
4 checked for discrepancies; none were found in the final version of the dataset.  
5  
6

7 All 217 RCA reports were reviewed and coded by the two teams. The extracted raw data underwent  
8 a keyword-based sorting of text strings in Microsoft Excel 2016 before being manually distributed  
9 into the final categories, resulting in 499 registered deficiencies and 462 contributing factors.  
10

11 Examples of typical cases are reported for each category in Table 2. While some minor  
12 misclassifications in the original data were noted by the research teams, terminology used in the  
13 original NITHA reports (including definition of missing data) was retained.  
14  
15  
16

17 In the original RCA reports each item could be reported multiple times. The range for some items  
18 varied from 1 to 6, depending on whether the RCA team had registered deficiencies in a merged or  
19 split form. To avoid skewed results, all observations were binarized (using the simple algorithm “IF  
20 count value  $\geq 0$ , THEN 1, ELSE 0”) before being entered into the network model.  
21  
22  
23  
24

## 25 **Data analysis**

26 The synthesized network model (the network, or the graph) contains two elements: nodes  
27 (sometimes called vertices), representing variables, and edges (also called links) which represent  
28 pairwise association among nodes.[16, 82] The network can be either directed, displaying the  
29 influential effect from one node to another node, or undirected, where mutual influences are  
30 indicated by a line between two nodes without any direction.[16] Centrality indices, such as strength,  
31 betweenness and expected influence, are employed to evaluate the network.[16, 85] An overview of  
32 different types of networks and applicable models has been published by Hevey, 2018.[23] For a  
33 further discussion on psychometrics and network estimation, we refer to previous researchers in this  
34 field.[31, 86-89]  
35  
36  
37  
38  
39  
40  
41  
42

43 Three networks were produced: one comprehensive network giving an overview of the major themes  
44 (Figure 1-2), one network showing subthemes of deficiencies (Figure 3-4) and one network showing  
45 subthemes of contributing factors (Supplement B). Frequencies and percentages are reported for  
46 each variable (Table 2), alongside the centrality indices and stability measures (Figure 1-2). Data were  
47 analysed using IBM Statistical Package for the Social Sciences version 25 and R version 3.5.0 (bootnet  
48 package version 1.4.3, ggplot2 version 3.3.5, igraph package version 1.2.6, qgraph package version  
49 1.6.9, IsingFit package version 0.3.1).[90-96] To visualize the dependencies, we used an undirected  
50 network (formally called a pairwise Markov random field).[28, 87, 97] Relevant relationships among  
51 nodes were estimated using IsingFit package which uses an enhanced least absolute shrinkage and  
52 selection operator (eLASSO), based on the Ising Model. The operator reduces spurious edges by  
53  
54  
55  
56  
57  
58  
59  
60

1  
2  
3 suppressing non-zero connections to exactly zero. Selection is performed by combining logistic  
4 regression ( $\ell_1$ -regularized) and a model selection based on the Extended Bayesian Information  
5 Criterion (EBIC).[95] Since the network structures were sparse, the EBIC hyperparameter ( $\gamma$ ) was  
6 adjusted to 0 after careful consideration and comparisons of different settings. A  $\gamma$  set to 0 (can vary  
7 from 0 to 1, default is 0.25) results in a lower shrinkage of estimated connections. As simulation  
8 studies have shown, the likelihood of false positives is low and the specificity will still be higher  
9 compared to a non-regularized partial correlation network.[23, 88, 98] The estimated networks were  
10 then bootstrapped for accuracy and stability using the bootnet function, which performs a non-  
11 parametric bootstrap to calculate the 95% bootstrapped confidence intervals (CIs) for the edges by  
12 resampling the data with replacement 2500 times per network. The networks were visualised with  
13 the plotting tools in qgraph, using the force directed layout “spring”, which employs the  
14 Fruchterman-Reingold algorithm and draws nodes with higher centrality towards the center.[92, 99]  
15 Lastly, network communities were calculated using the walktrap algorithm and plotted with igraph,  
16 qgraph and ggplot2 plotting tools.[91, 93, 96] The data and R code necessary to reproduce our  
17 results can be found on The Open Science Framework repository.[100-103]  
18  
19  
20  
21  
22  
23  
24  
25  
26  
27  
28

## 29 Patient and public involvement

30 Neither patients nor the public were involved in this study.  
31  
32

## 33 RESULTS

### 34 Frequencies and percentages of reported variables

35  
36  
37  
38  
39  
40  
41  
42  
43  
44  
45  
46  
47  
48  
49  
50  
51  
52  
53  
54  
55  
56  
57  
58  
59  
60

Frequencies and percentages for identified categories of deficiencies and contributing factors are reported in Table 2.

#### Table 2: Frequencies and percentages of reported variables.

[Please insert table 2, which was too large to fit into the manuscript, here. It is included as supplemented material.]

In total, 499 deficiencies were identified and classified under six major themes. The three most frequently reported categories concerned psychiatric evaluation, follow-up and cooperation. Typical cases involved patients who were referred from inpatient to outpatient services or changes in primary clinical contacts, both of which could result in missed appointments or incomplete assessments of health status. In 27 percent of the cases involving follow-up, healthcare planning that could have provided a framework for treatment during the transition was also lacking. A large portion (76 percent) of the deficiencies categorised as problems in cooperation were linked to unclear delimitation of responsibility. Lack of adequate information was also a common explanatory

factor, accounting for 15 percent of all cases. In contrast, deficiencies concerning safety and relatives were rare.

In line with the structure of the RCA protocol, the 462 contributing factors (in RCA terminology also known as root causes) formed five major themes (Table 2). Nearly half of the factors pointed towards failing procedures, routines, or guidelines as contributors. Examples included poor compliance to, or insufficient knowledge about an existing policy, or lack of guidelines that could be applied in a specific context. Suboptimal work structures, communication problems, and insufficient competence regarding medical, juridical, or organizational matters were also reported as common.

### Network stability

Correlation stability coefficients (CS-coefficients) for each of the three networks (the major network, Deficiencies network, and Contributing factors network) are shown Table 3. The major network and the Deficiencies network are stable. As the CS-coefficients for the Contributing factors network was below the cut-off value 0.25, indicating instability, no final conclusions could be drawn. [87] The visualization of this network is included in Supplement B, along with the centrality indices calculated for this subset.

**Table 1: CS-coefficients for each network (cut-off = 0.25).**

| Centrality index   | Major network | Deficiencies network | Contributing factors network |
|--------------------|---------------|----------------------|------------------------------|
| Edge               | 0.75          | 0.594                | 0.13                         |
| Closeness          | 0             | 0                    | 0                            |
| Betweenness        | 0             | 0                    | 0                            |
| Expected Influence | 0.75          | 0.594                | 0                            |
| Intercept          | 0.21          | 0.438                | 0.52                         |
| Strength           | 0.75          | 0.594                | 0                            |

### Central and peripheral nodes in the network

In this study, we have included the centrality indices node strength and edge strength to quantify impact on each network structure. Node strength is defined as the total sum of the magnitude of each of its edges. Nodes with fewer but stronger connections will be considered more central and thus yield a higher value, than nodes with many weak links.[23, 104, 105] The edge strength in a partial correlation or regularized network reflects the magnitude of the pairwise relationship between two nodes, while controlling for indirect influences via other nodes.[23, 88] The centrality

1  
2  
3 indices closeness, betweenness and expected influence (EI) were examined, but excluded from the  
4 main section of this paper as the CS-coefficients for closeness and betweenness were below cut-off  
5 and EI did not add anything to the interpretation that was not already explained by node strength.  
6  
7 Closeness is the average of the shortest path length from one node to every other node in the  
8 network.[105] Betweenness describes how often one node function as an intermediate station on  
9 the shortest path among neighbouring nodes. EI, like node strength, measures the importance of a  
10 node in the network while also taking negative edges into account.[104] Calculated values for these  
11 indices are included in Supplement C-E.

12  
13  
14  
15  
16  
17 [Please insert Figure 1 here.]

18  
19 The major network and significant differences of edges are shown in Figure 1.

20  
21  
22 [Please insert Figure 2 here.]

23  
24 As shown in both Figure 1 and Figure 2, the nodes representing documentation, communication,  
25 organization, follow-up, procedures and psychiatric evaluation were more central, compared to the  
26 nodes related to safety, competence, contact with relatives, technical issues and cooperation.  
27 Although the nodes involved all scored high in strength, two negative connections were found: 1)  
28 between organization and communication, and 2) between psychiatric evaluation and procedures,  
29 which may reflect how data were registered by the RCA teams.

30  
31  
32  
33  
34  
35 [Please insert Figure 3 here.]

36  
37 In the Deficiencies network (Figure 3), missed appointments, particularly the absence of booked  
38 follow-ups but also cancellations made by the patient, scored high in node strength. Consequently,  
39 missed assessments of suicide risk and continuous re-evaluation of the psychiatric status, were also  
40 central, along with the node representing shortages in staff.

41  
42  
43  
44  
45 [Please insert Figure 4 here.]

46  
47 In relation to these nodes, the nodes representing administrative problems, such as missed referrals  
48 or other types of transferred information, safety issues, suboptimal contact with relatives, healthcare  
49 plan being either absent or incomplete, and assessment not being recorded were more peripheral  
50 (Figure 4.)

51  
52  
53  
54 The third network, representing contributing factors, was too instable to estimate. Although the  
55 nodes for work structure, resources, competence, and continuity had the highest node strength  
56 centrality, the differences were not significant. Our recommendations are to examine these more  
57  
58  
59  
60

1  
2  
3 thoroughly in a future study with a larger sample. The topology and centrality indices for the  
4 Contributing factors network are shown in Supplement B.  
5  
6

### 7 8 **Detected communities**

9 Communities were detected using the walktrap algorithm.[91] The nodes belonging to a community  
10 are color marked in the visualizations of the networks in Figure 1 and Figure 2.  
11  
12

13 Two communities were present in the major network (Figure 1):  
14

15 1) the nodes for the deficiencies psychiatric evaluation, follow-up, and the contributing factor for  
16 procedures, routines, and policies.  
17  
18

19 2) the nodes for the deficiency communication and the nodes representing the contributing factors  
20 organization and communication.  
21  
22

23 Analysis of the Deficiencies network (Fig. 2) resulted in two detected communities. The first included  
24 the nodes representing understaffing, declined/missed appointments, and cases where future  
25 appointments had not been booked. The second covered the nodes representing assessments of  
26 suicide risk and of the overall mental condition.  
27  
28  
29

## 30 31 **DISCUSSION**

32 The results of this study suggest that reported adversities are linked to a group of activities, rather  
33 than to single mistakes. Providing suicidal patients with regular assessments, for instance, and  
34 proposing adequate actions depends not only on the personal conditions of the evaluating clinician  
35 and the patient being assessed, but also on proper work structures, good intrateam communication,  
36 adequate routines and well-known procedures, and sufficient documentation of planned and  
37 performed activities.  
38  
39  
40  
41  
42

43 There are three main findings of this study. First, missed and declined appointments are central  
44 features when examining elements occurring prior to the suicide. Together they account for a fifth of  
45 the total amount of deficiencies. The current study does not examine the positive effects of booked  
46 appointments and feedback loop systems which enhances the ability for healthcare providers to  
47 react when a patient does not turn up on scheduled meetings. Neither have we investigated cases  
48 with negative correlations between treatment cancellations and suicide. However, one hypothesis  
49 drawn from our results and extrapolated conclusions from previous studies,[51, 52, 57, 58, 60-63, 65-  
50 72] is that any disruption in treatment is negative, and cancellations made by the patient could be an  
51 early warning sign of an ongoing exacerbation of the suicidal process. During phases of elevated  
52 suicide risk, or in the early stages of recovery from a suicide attempt, the wellbeing of the patient is  
53  
54  
55  
56  
57  
58  
59  
60



1  
2  
3 frail, and the suicide risk may fluctuate rapidly.[58, 61, 64-66] Establishing a backup system, which  
4 safeguards follow-up plans and alerts healthcare staff when patients cancel planned appointments,  
5 could help improve patient safety. Second, many nodes are still disconnected. Even if it is likely that  
6 there is an underlying covariance, the correlation is not independently significant. The sparsity of the  
7 networks could be explained by the estimation procedure. Each network has been regularized in  
8 order to reduce false positive connections and produce parsimonious graphs. When comparing them  
9 with networks based on partial correlation matrices, many edges have been omitted due to the  
10 penalization. It is therefore likely that other patterns would appear if more data were entered. Third,  
11 the nodes representing security, technical issues and contact with relatives have both low  
12 frequencies and low centrality. This means that adversities related to these areas are rarely reported.  
13 One reason for this can be the very nature of the type of failures that can occur in these areas.  
14 Denied access to an important medical record system at a specific time rarely affects more than one  
15 or a few team members at a time. Ligature points, once removed, do not reappear at the exact same  
16 location. Establishing and maintaining stable work conditions, on the other hand, is more elusive. The  
17 concept of organizational prerequisites to provide safe interventions to suicidal patients is subjective  
18 which could lead to a higher rate of recurrences of management related issues. While adverse events  
19 concerning security at the inpatient facilities were rare, the transition to outpatient services seem to  
20 be associated with elevated risk levels. This is not very surprising, as transitions imply a change in  
21 primary caregiver and a shift from short-term to long-term treatment goals. Our results only support  
22 conclusions about an observed general relationship. To gain more knowledge about the mechanisms  
23 involved, there is a need for more network studies focusing more extensively on these steps of the  
24 process. Even though interviews with relatives were included in 64 % of the reports, their perspective  
25 were only reflected in 1 % of the deficiencies (Table 2). This situation has been previously described  
26 by Bouwman et al. (2018). After examining policies from 15 healthcare organizations and spoken to  
27 35 stakeholders (including patient, families and their counsellors, national regulators and  
28 professionals) they concluded that involvement by relatives, insofar they had been involved, rarely  
29 extended beyond aftercare and information provision.[50] With this in mind, there is reason to  
30 believe that our results would benefit from being complemented with studies based on narratives  
31 from a contrasting point of view.  
32  
33  
34  
35  
36  
37  
38  
39  
40  
41  
42  
43  
44  
45  
46  
47  
48  
49  
50

51 We acknowledge that from a general point of view, some of our findings are similar to the  
52 conclusions drawn by our colleagues in the same field. Suicide risk is multifactorial, and decisions  
53 about appropriate safety measures are dependent on factors on both individual and structural  
54 levels.[5, 6, 10, 38, 40, 42, 44, 46, 48, 49, 51, 53-55, 57, 58, 60-64, 66-69] However, following the  
55 argumentation of Fried and Robinaugh (2021) on complexity, adverse events cannot be prevented by  
56  
57  
58  
59  
60



1  
2  
3 understanding the single components alone, neglecting the interactions among them.[106] If the  
4 value of a unique node is determined not only by the intrinsic properties of the node itself, but by its  
5 relations to other objects, the study of single factors will not yield any ultimate answers about how  
6 to prevent undesired events. To gain more knowledge, we must first examine the dynamics of the  
7 systems from which adversity arises.  
8  
9

## 11 12 **CONCLUSION**

13  
14 Applying network analysis to investigate patient safety adds to previous research by elucidating  
15 patterns of associated factors which may be unclear when only incident rate is considered. The  
16 results shows that failed assessments and cancelled treatments during follow-up are both frequent  
17 and have a high centrality in relation to the other nodes in the network and could function as a  
18 warning sign for exacerbation. Organizational instability, in terms of understaffing, shortages of  
19 resources and suboptimal work procedures are also prominent features of the networks. Although  
20 comparative studies are needed before any final conclusions can be drawn, focusing on these areas  
21 may improve patient safety in suicide prevention.  
22  
23  
24  
25  
26  
27

## 28 29 **STRENGTHS AND LIMITATIONS**

30  
31 Strengths of the study include data collected from NITHA, the only open national resource in Sweden  
32 for the dissemination of RCA reports. These reports were produced in a standardized manner by  
33 trained RCA teams, and the data were examined and categorized by four professionals, all  
34 experienced in performing and peer-reviewing RCA reports. Considering the dynamic nature of  
35 deficiencies in healthcare where underlying factors are rarely sharply outlined, but rather multi-  
36 layered, network analysis can bring new and valuable insights of risk-prone areas.  
37  
38  
39

40  
41 The study also has several limitations. Since we obtained our data exclusively through the NITHA  
42 system, other post-suicide investigations were not included. Because regional institutional praxis  
43 concerning submission to the NITHA database varied, RCA reports cannot be considered  
44 representative for the country of Sweden. A relatively small proportion of all suicides were submitted  
45 to the database, and therefore selection bias cannot be ruled out. The RCA methodology is designed  
46 to scrutinize organizations and detect possible causes for systematic negative output. Consequently,  
47 the reported findings may focus on incidental discoveries, rather than some latent factor which lies  
48 beyond the scope of the protocol. Moreover, since RCA aims to identify organizational  
49 vulnerabilities, the reports lack certain details concerning the patients themselves. As we did not  
50 have access to original records, we have not been able to verify the accuracy of the content in the  
51 RCA reports. Therefore, our findings will reflect any misclassification done by the RCA teams during  
52 the initial investigation process. Lastly, the classification tool used by the auditing teams has not  
53  
54  
55  
56  
57  
58  
59  
60

1  
2  
3 been validated by independent reviewers. The data were qualitatively categorized and could have  
4 been organized differently.  
5  
6

## 7 **FUTURE RESEARCH**

9 Based on the findings of this study, further research on the protective effects of implemented  
10 security systems which help healthcare providers to react when patients drop out of treatment is  
11 suggested. Considering the relatively low number of observations, we also recommend future  
12 network studies based on a larger sample. To gain more insights into the perspectives of patients and  
13 relatives, network studies based on their experiences would be a fruitful approach.  
14  
15  
16  
17

## 18 **ACKNOWLEDGEMENTS**

19 The authors would like to express their gratitude to Cecilia Boldt-Christmas, Marzia Dellepiane, and  
20 Evalena von Hausswolff who participated in the data extraction and coding.  
21  
22  
23

## 24 **CONTRIBUTORS**

25 MR designed the study, collected and registered the data, performed the analyses, and drafted the  
26 manuscript. EC, LA, MW, and TB contributed to the study design, analyses, and manuscript revision.  
27  
28 All authors read and approved the final manuscript.  
29  
30  
31

## 32 **COMPETING INTERESTS**

33  
34 There are no competing interests for any author.  
35  
36

## 37 **FUNDING**

38 This work was supported by the Affective Clinic, Sahlgrenska University Hospital, Gothenburg, Region  
39 Västra Götaland (no specific grant number).  
40  
41  
42

## 43 **DATA AVAILABILITY STATEMENT**

44 Copies of used R scripts and data sets can be found in our repository at Open Science Framework.  
45  
46  
47

## 48 **ETHICAL REVIEW**

49 According to the Swedish Act Concerning the Ethical Review of Research Involving Humans  
50 (2003:460), this study did not require ethical review as it did not involve human participants.  
51  
52  
53  
54  
55  
56  
57  
58  
59  
60

## REFERENCES

1. World Health Organization. Suicide worldwide in 2019: global health estimates. Geneva: World Health Organization; 2021. Available from: <https://www.who.int/publications/i/item/9789240026643> (accessed October 19, 2021).
2. World Health Organization. Preventing suicide: a global imperative. 2014. Available from: [http://apps.who.int/iris/bitstream/handle/10665/131056/9789241564779\\_eng.pdf?sequence=1](http://apps.who.int/iris/bitstream/handle/10665/131056/9789241564779_eng.pdf?sequence=1) (accessed January 19, 2019).
3. Ropper AH, Fazel S, Runeson B. Suicide. *The New England Journal of Medicine*. 2020;382(3):266-74.
4. Too LS, Spittal MJ, Bugeja L, et al. The association between mental disorders and suicide: A systematic review and meta-analysis of record linkage studies. *J Affect Disord*. 2019;259:302-13.
5. Runeson B, Haglund A, Lichtenstein P, et al. Suicide risk after nonfatal self-harm: a national cohort study, 2000-2008. *J Clin Psychiatry*. 2016;77(2):240-6.
6. Large M, Sharma S, Cannon E, et al. Risk Factors for Suicide Within a Year of Discharge from Psychiatric Hospital: A Systematic Meta-Analysis. *Aust N Z J Psychiatry*. 2011;45(8):619-28.
7. Waern M, Kaiser N, Renberg ES. Psychiatrists' experiences of suicide assessment. *BMC Psychiatry*, 2016, Vol 16. 2016;16.
8. Steeg S, Quinlivan L, Nowland R, et al. Accuracy of risk scales for predicting repeat self-harm and suicide: a multicentre, population-level cohort study using routine clinical data.(Report). *BMC Psychiatry*. 2018;18(1).
9. Smith MJ, Bouch J, Bradstreet S, et al. Health services, suicide, and self-harm: patient distress and system anxiety. *Lancet Psychiatry*. 2015;2(3):275-80.

10. Hoffmire C, Stephens B, Morley S, et al. VA Suicide Prevention Applications Network: A National Health Care System–Based Suicide Event Tracking System. *Public Health Rep.* 2016;131(6):816-21.
11. Clarke I. Learning from critical incidents. *Advances in Psychiatric Treatment.* 2018;14(6):460-8.
12. Ericsson C, Hessel Å. *Risikanalys och händelseanalys: analysmetoder för att öka patientsäkerheten : handbok* [Risk analysis and Root Cause Analysis: analysis methods to improve patient safety: handbook]. Stockholm: Sveriges kommuner och landsting; 2015. Available from: <http://webbutik.skl.se/sv/artiklar/risikanalys-och-handelseanalys-analysmetoder-for-att-oka-patientsakerheten.html> (accessed October 19, 2021).
13. Bowie P, Skinner J, de Wet C. Training health care professionals in root cause analysis: a cross-sectional study of post-training experiences, benefits and attitudes. *BMC Health Serv Res.* 2013;13:50-.
14. Aboumradi M, Neily J, Watts BV. Teaching Root Cause Analysis Using Simulation: Curriculum and Outcomes. *Journal of medical education and curricular development.* 2019;6:2382120519894270-.
15. Fröding E, Gäre BA, Westrin Å, et al. Suicide as an incident of severe patient harm: a retrospective cohort study of investigations after suicide in Swedish healthcare in a 13-year perspective. *BMJ Open.* 2021;11(3):e044068.
16. Newman M. *Networks.* Oxford: Oxford: Oxford University Press; 2018.
17. Luke DA, Harris JK. Network Analysis in Public Health: History, Methods, and Applications. *Annu Rev Public Health.* 2007;28(1):69-93.
18. Borsboom D. Psychometric perspectives on diagnostic systems. *J Clin Psychol.* 2008;64(9):1089-108.
19. Borsboom D, Cramer AO. Network analysis: an integrative approach to the structure of psychopathology. *Annu Rev Clin Psychol.* 2013;9:91-121.

- 1  
2  
3  
4 20. Schmittmann VD, Cramer AOJ, Waldorp LJ, et al. Deconstructing the  
5  
6 construct: A network perspective on psychological phenomena. *New*  
7  
8 *Ideas Psychol.* 2013;31(1):43-53.
- 9  
10 21. van der Maas HL, Dolan CV, Grasman RP, et al. A dynamical model of  
11  
12 general intelligence: the positive manifold of intelligence by mutualism.  
13  
14 *Psychol Rev.* 2006;113(4):842-61.
- 15  
16 22. Cramer AOJ, Waldorp LJ, van der Maas HLJ, et al. Comorbidity: A  
17  
18 network perspective. *The Behavioral and brain sciences.* 2010;33(2-  
19  
20 3):15-150.
- 21  
22 23. Hevey D. Network analysis: a brief overview and tutorial. *Health*  
23  
24 *Psychology and Behavioral Medicine.* 2018;6(1):301-28.
- 25  
26 24. Beard C, Millner A, Forgeard M, et al. Network analysis of depression  
27  
28 and anxiety symptom relationships in a psychiatric sample. *Psychol*  
29  
30 *Med.* 2016;46(16):3359-69.
- 31  
32 25. Fried EI, van Borkulo CD, Cramer AOJ, et al. Mental disorders as  
33  
34 networks of problems: a review of recent insights. *Soc Psychiatry*  
35  
36 *Psychiatr Epidemiol.* 2017;52(1):1-10.
- 37  
38 26. Fried EI, Bockting C, Arjadi R, et al. From Loss to Loneliness: The  
39  
40 Relationship Between Bereavement and Depressive Symptoms. *Journal*  
41  
42 *of abnormal psychology (1965).* 2015;124(2):256-65.
- 43  
44 27. Borsboom D, Cramer AOJ, Schmittmann VD, et al. The small world of  
45  
46 psychopathology. *PLoS One.* 2011;6(11):e27407-e.
- 47  
48 28. Borsboom D, Deserno MK, Rhemtulla M, et al. Network analysis of  
49  
50 multivariate data in psychological science. *Nature Reviews Methods*  
51  
52 *Primers.* 2021;1(1):58.
- 53  
54 29. Bringmann LF, Lemmens LHJM, Huibers MJH, et al. Revealing the  
55  
56 dynamic network structure of the Beck Depression Inventory-II. *Psychol*  
57  
58 *Med.* 2015;45(4):747-57.
- 59  
60

- 1  
2  
3  
4 30. Costantini G, Epskamp S, Borsboom D, et al. State of the aRt  
5  
6  
7  
8  
9  
10  
11  
12  
13  
14  
15  
16  
17  
18  
19  
20  
21  
22  
23  
24  
25  
26  
27  
28  
29  
30  
31  
32  
33  
34  
35  
36  
37  
38  
39  
40  
41  
42  
43  
44  
45  
46  
47  
48  
49  
50  
51  
52  
53  
54  
55  
56  
57  
58  
59  
60  
31. Costantini G, Richetin J, Preti E, et al. Stability and variability of  
personality networks. A tutorial on recent developments in network  
psychometrics. *Pers Individ Dif*. 2019;136:68-78.
32. Cramer AOJ, van der Sluis S, Noordhof A, et al. Dimensions of Normal  
Personality as Networks in Search of Equilibrium: You Can't Like Parties  
if You Don't Like People. *European Journal of Personality*.  
2012;26(4):414-31.
33. Forkmann T, Teismann T, Stenzel J-S, et al. Defeat and entrapment:  
more than meets the eye? Applying network analysis to estimate  
dimensions of highly correlated constructs.(Report). *BMC Med Res  
Methodol*. 2018;18(1).
34. Richetin J, Preti E, Costantini G, et al. The centrality of affective  
instability and identity in Borderline Personality Disorder: Evidence from  
network analysis. *PLoS One*. 2017;12(10).
35. Isvoranu A-M, Abidin E, Chong SA, et al. Extended network analysis:  
from psychopathology to chronic illness. *BMC Psychiatry*.  
2021;21(1):119-.
36. Isvoranu A-M, van Borkulo CD, Boyette L-L, et al. A Network Approach  
to Psychosis: Pathways Between Childhood Trauma and Psychotic  
Symptoms. *Schizophr Bull*. 2017;43(1):187-96.
37. Köhne ACJ, Isvoranu A-M. A Network Perspective on the Comorbidity of  
Personality Disorders and Mental Disorders: An Illustration of  
Depression and Borderline Personality Disorder. *Front Psychol*.  
2021;12:680805-.
38. Cheng A, Chen T, Chen CC, et al. Psychosocial and psychiatric risk  
factors for suicide: case-control psychological autopsy study. *Br J  
Psychiatry*. 2000(177):360-5.

- 1  
2  
3  
4 39. Berman AL, Silverman MM. Suicide Risk Assessment and Risk  
5 Formulation Part II : Suicide Risk Formulation and the Determination of  
6 Levels of Risk. *Suicide and Life-Threatening Behavior*. 2014;44(4):432-  
7 43.  
8  
9
- 10  
11 40. Pirkis J, Too LS, Spittal MJ, et al. Interventions to reduce suicides at  
12 suicide hotspots: a systematic review and meta-analysis. *Lancet*  
13 *Psychiatry*. 2015;2(11):994-1001.  
14  
15
- 16 41. Barker E, Kolves K, De Leo D. Rail-suicide prevention: Systematic  
17 literature review of evidence-based activities. *Asia-Pacific Psychiatry*.  
18 2017;9(3):e12246.  
19  
20
- 21 42. Zalsman G, Hawton K, Wasserman D, et al. Suicide prevention  
22 strategies revisited: 10-year systematic review. *Lancet Psychiatry*.  
23 2016;3(7):646-59.  
24  
25
- 26 43. Zalsman G, Hawton K, Wasserman D, et al. Evidence-based national  
27 suicide prevention taskforce in Europe: A consensus position paper. *Eur*  
28 *Neuropsychopharmacol*. 2017;27(4):418-21.  
29  
30
- 31 44. Mann JJ, Apter A, Bertolote J, et al. Suicide prevention strategies: a  
32 systematic review. *JAMA*. 2005;294(16):2064-74.  
33  
34
- 35 45. Vine R, Mulder C. After an inpatient suicide: the aim and outcome of  
36 review mechanisms. *Australasian Psychiatry*. 2013;21(4):359-64.  
37  
38
- 39 46. Meerwijk EL, Parekh A, Oquendo MA, et al. Direct versus indirect  
40 psychosocial and behavioural interventions to prevent suicide and  
41 suicide attempts: a systematic review and meta-analysis. *Lancet*  
42 *Psychiatry*. 2016;3(6):544-54.  
43  
44
- 45 47. Sakashita T, Oyama H. Overview of community-based studies of  
46 depression screening interventions among the elderly population in  
47 Japan. *Aging Ment Health*. 2016;20(2):231-9.  
48  
49
- 50 48. Cole-King A, Parker V, Williams H, et al. Suicide prevention: are we  
51 doing enough? *Advances in Psychiatric Treatment*. 2018;19(4):284-91.  
52  
53  
54  
55  
56  
57  
58  
59  
60



- 1  
2  
3  
4 49. Huisman A, Kerkhof AJFM, Robben PBM. Suicides in users of mental  
5 health care services: treatment characteristics and hindsight reflections.  
6 *Suicide Life Threat Behav.* 2011;41(1):41.  
7
- 8  
9 50. Bouwman R, De Graaff B, De Beurs D, et al. Involving Patients and  
10 Families in the Analysis of Suicides, Suicide Attempts, and Other  
11 Sentinel Events in Mental Healthcare: A Qualitative Study in The  
12 Netherlands. *Int J Environ Res Public Health.* 2018;15(6):1104.  
13
- 14  
15 51. Burgess P, Pirkis J, Morton J, et al. Lessons From a Comprehensive  
16 Clinical Audit of Users of Psychiatric Services Who Committed Suicide.  
17 *Psychiatr Serv.* 2000;51(12):1555-60.  
18
- 19  
20 52. Roos af Hjelmsäter E, Ros A, Gäre BA, et al. Deficiencies in healthcare  
21 prior to suicide and actions to deal with them: a retrospective study of  
22 investigations after suicide in Swedish healthcare. *BMJ Open.*  
23 2019;9(12):e032290.  
24
- 25  
26 53. Large M, Smith G, Sharma S, et al. Systematic review and meta-  
27 analysis of the clinical factors associated with the suicide of psychiatric  
28 in-patients. *Acta Psychiatr Scand.* 2011;124(1):18-9.  
29
- 30  
31 54. Meehan J, Kapur N, Hunt I, et al. Suicide in Mental Health In-Patients  
32 and within 3 Months of Discharge. *The British Journal of Psychiatry.*  
33 2006;188(2):129-34.  
34
- 35  
36 55. Changchien T-C, Yen Y-C, Wang Y-J, et al. Establishment of a  
37 Comprehensive Inpatient Suicide Prevention Network by Using Health  
38 Care Failure Mode and Effect Analysis. *Psychiatr Serv.* 2019;70(6):518-  
39 21.  
40
- 41  
42 56. Williams SC, Schmaltz SP, Castro GM, et al. Incidence and Method of  
43 Suicide in Hospitals in the United States. *The Joint Commission Journal*  
44 *on Quality and Patient Safety.* 2018;44(11):643-50.  
45
- 46  
47 57. Iliachenko EK, Ragazan DC, Eberhard J, et al. Suicide mortality after  
48 discharge from inpatient care for bipolar disorder: A 14-year Swedish  
49 national registry study. *J Psychiatr Res.* 2020;127:20-7.  
50  
51  
52  
53  
54  
55  
56  
57  
58  
59  
60



- 1  
2  
3  
4 58. Haglund A, Lysell H, Larsson H, et al. Suicide Immediately After  
5 Discharge From Psychiatric Inpatient Care: A Cohort Study of Nearly 2.9  
6 Million Discharges. *The Journal of clinical psychiatry*. 2019;80(2).  
7  
8
- 9 59. Appleby L, Dennehy JA, Thomas CS, et al. Aftercare and clinical  
10 characteristics of people with mental illness who commit suicide: a case-  
11 control study. *The Lancet*. 1999;353(9162):1397-400.  
12  
13
- 14 60. Qin P, Nordentoft M. Suicide Risk in Relation to Psychiatric  
15 Hospitalization: Evidence Based on Longitudinal Registers. *JAMA*  
16 *Psychiatry*. 2005;62(4):427-32.  
17  
18
- 19 61. Chung D, Hadzi-Pavlovic D, Wang M, et al. Meta-analysis of suicide  
20 rates in the first week and the first month after psychiatric  
21 hospitalisation. *BMJ Open*. 2019;9(3).  
22  
23
- 24 62. Riblet VN, Shiner RB, Watts RB, et al. Death by Suicide Within 1 Week  
25 of Hospital Discharge: A Retrospective Study of Root Cause Analysis  
26 Reports. *The Journal of Nervous and Mental Disease*. 2017;205(6):436-  
27 42.  
28  
29
- 30 63. Valenstein M, Kim HM, Ganoczy D, et al. Higher-risk periods for suicide  
31 among VA patients receiving depression treatment: Prioritizing suicide  
32 prevention efforts. *J Affect Disord*. 2009;112(1):50-8.  
33  
34
- 35 64. Bickley H, Hunt IM, Windfuhr K, et al. Suicide Within Two Weeks of  
36 Discharge From Psychiatric Inpatient Care: A Case-Control Study.  
37 *Psychiatr Serv*. 2013;64(7):653-9.  
38  
39
- 40 65. Appleby L, Dennehy JA, Thomas CS, et al. Aftercare and clinical  
41 characteristics of people with mental illness who commit suicide: a case-  
42 control study. *The Lancet (British edition)*. 1999;353(9162):1397-400.  
43  
44
- 45 66. Chung DT, Ryan CJ, Hadzi-Pavlovic D, et al. Suicide Rates After  
46 Discharge From Psychiatric Facilities: A Systematic Review and Meta-  
47 analysis  
48 Suicide Rates After Discharge From Psychiatric Facilities  
49 Suicide Rates After Discharge From Psychiatric Facilities. *JAMA Psychiatry*.  
50 2017;74(7):694-702.  
51  
52  
53  
54  
55  
56  
57  
58  
59  
60

- 1  
2  
3  
4 67. Mills PD, Gallimore BI, Watts BV, et al. Suicide attempts and  
5 completions in Veterans Affairs nursing home care units and long-term  
6 care facilities: a review of root-cause analysis reports. *Int J Geriatr*  
7 *Psychiatry*. 2016;31(5):518-25.  
8  
9  
10  
11 68. Mills PD, Huber SJ, Vince Watts B, et al. Systemic vulnerabilities to  
12 suicide among veterans from the Iraq and Afghanistan Conflicts: review  
13 of case reports from a National Veterans Affairs Database. *Suicide Life*  
14 *Threat Behav*. 2011;41(1):21-32.  
15  
16  
17 69. Mills PD, Neily J, Luan D, et al. Actions and implementation strategies to  
18 reduce suicidal events in the Veterans Health Administration. *Jt Comm J*  
19 *Qual Patient Saf*. 2006;32(3):130-41.  
20  
21  
22  
23 70. Aboumrad M, Shiner B, Riblet N, et al. Factors contributing to cancer-  
24 related suicide: A study of root-cause analysis reports. *Psychooncology*.  
25 2018;27(9):2237-44.  
26  
27  
28  
29 71. Mills PD, Watts BV, Shiner B, et al. Adverse events occurring on mental  
30 health units. *Gen Hosp Psychiatry*. 2018;50:63-8.  
31  
32  
33 72. Gillies D, Chicop D, O'Halloran P. Root Cause Analyses of Suicides of  
34 Mental Health Clients. *Crisis: The Journal of Crisis Intervention and*  
35 *Suicide Prevention*. 2015;36(5):316-24.  
36  
37  
38  
39 73. de Beurs D. Network Analysis: A Novel Approach to Understand  
40 Suicidal Behaviour. *Int J Environ Res Public Health*. 2017;14(3):219.  
41  
42  
43 74. Gijzen MWM, Rasing SPA, Creemers DHM, et al. Suicide ideation as a  
44 symptom of adolescent depression. a network analysis. *J Affect Disord*.  
45 2021;278:68-77.  
46  
47  
48 75. Rath D, de Beurs D, Hallensleben N, et al. Modelling suicide ideation  
49 from beep to beep: Application of network analysis to ecological  
50 momentary assessment data. *Internet Interventions*. 2019;18:100292.  
51  
52  
53 76. Shiratori Y, Tachikawa H, Nemoto K, et al. Network analysis for motives  
54 in suicide cases: A cross-sectional study. *Psychiatry Clin Neurosci*.  
55 2014;68(4):299-307.  
56  
57  
58  
59  
60

- 1  
2  
3  
4 77. De Beurs D, Fried EI, Wetherall K, et al. Exploring the psychology of  
5 suicidal ideation: A theory driven network analysis. *Behav Res Ther.*  
6 2019;120:103419.  
7  
8  
9 78. Núñez D, Ulloa JL, Guillaume S, et al. Suicidal ideation and affect lability  
10 in single and multiple suicidal attempters with Major Depressive  
11 Disorder: An exploratory network analysis. *J Affect Disord.*  
12 2020;272:371-9.  
13  
14  
15 79. Bloch-Elkouby S, Gorman B, Schuck A, et al. The Suicide Crisis  
16 Syndrome: A Network Analysis. *J Couns Psychol.* 2020;67(5):595-607.  
17  
18  
19 80. Núñez D, Fresno A, van Borkulo CD, et al. Examining relationships  
20 between psychotic experiences and suicidal ideation in adolescents  
21 using a network approach. *Schizophr Res.* 2018;201:54-61.  
22  
23  
24 81. De Beurs D, Fried EI, Wetherall K, et al. Exploring the psychology of  
25 suicidal ideation: A theory driven network analysis. *Behaviour research*  
26 *and therapy.* 2019;120.  
27  
28  
29 82. de Beurs D, Vancayseele N, van Borkulo C, et al. The association  
30 between motives, perceived problems and current thoughts of self-harm  
31 following an episode of self-harm. A network analysis. *J Affect Disord.*  
32 2018;240:262-70.  
33  
34  
35 83. Simons JS, Simons RM, Walters KJ, et al. Nexus of despair: A network  
36 analysis of suicidal ideation among veterans. *Archives of suicide*  
37 *research.* 2020;24(sup1):314-36.  
38  
39  
40 84. Inera. *Nationellt IT-stöd för händelseanalyser - NITHA Kunskapsbank*  
41 [National database for root cause analyses]. October 19, 2021.  
42 Available from: <https://nitha.inera.se/Learn>.  
43  
44  
45 85. Bringmann LF, Elmer T, Epskamp S, et al. What do centrality measures  
46 measure in psychological networks? *J Abnorm Psychol.*  
47 2019;128(8):892-903.  
48  
49  
50  
51  
52  
53  
54  
55  
56  
57  
58  
59  
60

- 1  
2  
3 86. Williams DR, Rhemtulla M, Wysocki AC, et al. On Nonregularized  
4 Estimation of Psychological Networks. *Multivariate Behavioral*  
5 *Research*. 2019;54(5):719-50.  
6  
7
- 8  
9 87. Epskamp S, Borsboom D, Fried EI. Estimating psychological networks  
10 and their accuracy: A tutorial paper. *Behav Res Methods*.  
11 2018;50(1):195-212.  
12  
13
- 14 88. Epskamp S, Fried EI. A Tutorial on Regularized Partial Correlation  
15 Networks. *Psychol Methods*. 2018;23(4):617-34.  
16  
17
- 18 89. Epskamp S, Waldorp LJ, Möttus R, et al. The Gaussian Graphical Model  
19 in Cross-Sectional and Time-Series Data. *Multivariate behavioral*  
20 *research*. 2018;53(4):453-80.  
21  
22
- 23 90. van Borkulo C, Epskamp, S., & Robitzsch, A. IsingFit: Fitting Ising  
24 Models Using the Lasso Method. 2016. Available from: [https://CRAN.R-](https://CRAN.R-project.org/package=IsingFit)  
25 [project.org/package=IsingFit](https://CRAN.R-project.org/package=IsingFit).  
26  
27
- 28 91. Csardi GN, T. The igraph software package for complex network  
29 research, InterJournal, Complex Systems 1695. 2006. Available from:  
30 <https://igraph.org>.  
31  
32
- 33 92. Epskamp S, Constantini, G., Haslbeck, J. & Isvoranu, A. Package  
34 qgraph: manual 2021. Available from: [https://cran.r-](https://cran.r-project.org/web/packages/qgraph/qgraph.pdf)  
35 [project.org/web/packages/qgraph/qgraph.pdf](https://cran.r-project.org/web/packages/qgraph/qgraph.pdf).  
36  
37
- 38 93. Epskamp S, Cramer, A., Waldorp, L., Schmittmann, V. & Borsboom, D.,  
39 . qgraph: Network Visualizations of Relationships in Psychometric Data:  
40 Journal of Statistical Software, 48(4), 1-18. ; 2012. Available from:  
41 <http://www.jstatsoft.org/v48/i04/>.  
42  
43
- 44 94. R Core Team. R: A language and environment for statistical computing  
45 Vienna, Austria: R Foundation for Statistical Computing; 2021. Available  
46 from: <https://www.R-project.org/>.  
47  
48
- 49 95. van Borkulo & Epskamp SwcfR, A. Package 'IsingFit' 2016. Available  
50 from: <https://cran.r-project.org/web/packages/IsingFit/IsingFit.pdf>.  
51  
52  
53  
54  
55  
56  
57  
58  
59  
60

- 1  
2  
3  
4 96. Wickham H. *ggplot2: Elegant Graphics for Data Analysis*. New York: Springer-Verlag New York; 2016.
- 5  
6  
7 97. Epskamp S, van Borkulo CD, van der Veen DC, et al. Personalized  
8 Network Modeling in Psychopathology: The Importance of  
9 Contemporaneous and Temporal Connections. *Clinical Psychological  
10 Science*. 2018;6(3):416-27.
- 11  
12  
13 98. van Borkulo CD, Borsboom D, Epskamp S, et al. A new method for  
14 constructing networks from binary data. *Sci Rep*. 2014;4(1):5918-.
- 15  
16  
17 99. Fruchterman TMJ, Reingold EM. Graph drawing by force-directed  
18 placement. *Software: Practice and Experience*. 1991;21(11):1129-64.
- 19  
20  
21 [dataset] 100. Rex M. Data from: Final Major Network. The Open Science  
22 Framework Repository, October 19, 2021. Available from:  
23 [https://osf.io/3dhtf/?view\\_only=084563d6b38a4f5aa32f6d76c50c0a34](https://osf.io/3dhtf/?view_only=084563d6b38a4f5aa32f6d76c50c0a34).
- 24  
25  
26 [dataset] 101. Rex M. Data from: Final deficiencies network. The Open  
27 Science Framework Repository, October 20, 2021. Available from:  
28 [https://osf.io/3dhtf/?view\\_only=084563d6b38a4f5aa32f6d76c50c0a34](https://osf.io/3dhtf/?view_only=084563d6b38a4f5aa32f6d76c50c0a34).
- 29  
30  
31 [dataset] 102. Rex M. Data from: Final Contributing factors network. The Open  
32 Science Framework Repository, October 14, 2021. Available from:  
33 [https://osf.io/3dhtf/?view\\_only=084563d6b38a4f5aa32f6d76c50c0a34](https://osf.io/3dhtf/?view_only=084563d6b38a4f5aa32f6d76c50c0a34).
- 34  
35  
36 103. Rex M. R script used in the manuscript Coexisting service related  
37 factors preceding suicide: A network analysis. The Open Science  
38 Framework Repository, October 21, 2021. Available from:  
39 [https://osf.io/3dhtf/?view\\_only=084563d6b38a4f5aa32f6d76c50c0a34](https://osf.io/3dhtf/?view_only=084563d6b38a4f5aa32f6d76c50c0a34).
- 40  
41  
42 104. Robinaugh DJ, Millner AJ, McNally RJ. Identifying highly influential  
43 nodes in the complicated grief network. *J Abnorm Psychol*.  
44 2016;125(6):747-57.
- 45  
46  
47 105. de Beurs DP, van Borkulo CD, O'Connor RC. Association between  
48 suicidal symptoms and repeat suicidal behaviour within a sample of  
49 hospital-treated suicide attempters. *BJPsych Open*. 2017;3(3):120-6.
- 50  
51  
52  
53  
54  
55  
56  
57  
58  
59  
60

1  
2  
3  
4  
5  
6  
7  
8  
9  
10  
11  
12  
13  
14  
15  
16  
17  
18  
19  
20  
21  
22  
23  
24  
25  
26  
27  
28  
29  
30  
31  
32  
33  
34  
35  
36  
37  
38  
39  
40  
41  
42  
43  
44  
45  
46  
47  
48  
49  
50  
51  
52  
53  
54  
55  
56  
57  
58  
59  
60

106. Fried EI, Robinaugh DJ. Systems all the way down: embracing complexity in mental health research. *BMC Med.* 2020;18(1):205-.

For peer review only

1  
2  
3  
4  
5  
6  
7  
8  
9  
10  
11  
12  
13  
14  
15  
16  
17  
18  
19  
20  
21  
22  
23  
24  
25  
26  
27  
28  
29  
30  
31  
32  
33  
34  
35  
36  
37  
38

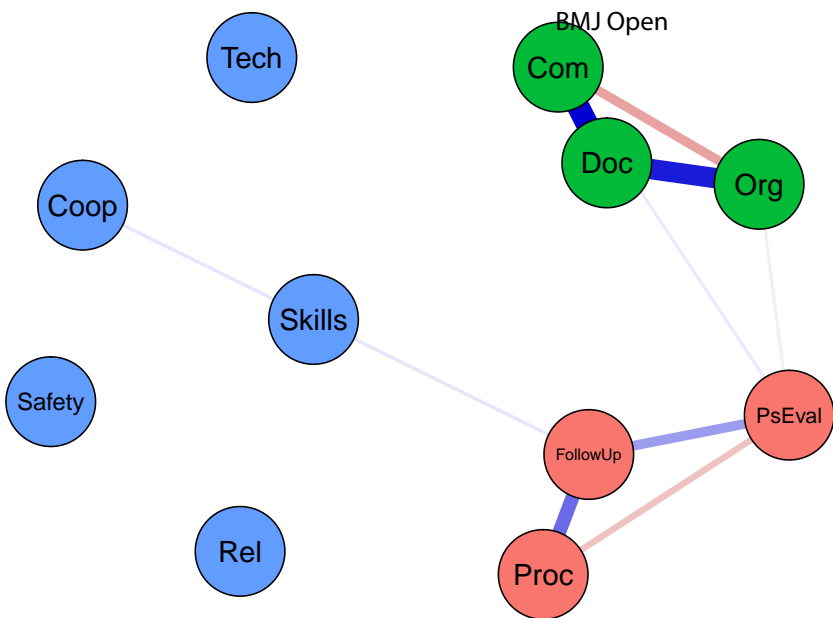

- Community 1
- Community 2
- Disconnected nodes

edge

|                 |         |             |            |            |               |                 |               |         |         |
|-----------------|---------|-------------|------------|------------|---------------|-----------------|---------------|---------|---------|
| Doc—Com         |         |             |            |            |               |                 |               |         |         |
| Doc—Org         |         |             |            |            |               |                 |               |         |         |
| FollowUp—Proc   |         |             |            |            |               |                 |               |         |         |
| PsEval—FollowUp |         |             |            |            |               |                 |               |         |         |
| Coop—FollowUp   |         |             |            |            |               |                 |               |         |         |
| PsEval—Com      |         |             |            |            |               |                 |               |         |         |
| PsEval—Org      |         |             |            |            |               |                 |               |         |         |
| PsEval—Proc     |         |             |            |            |               |                 |               |         |         |
| Org—Com         |         |             |            |            |               |                 |               |         |         |
|                 | Org—Com | PsEval—Proc | PsEval—Org | PsEval—Com | Coop—FollowUp | PsEval—FollowUp | FollowUp—Proc | Doc—Org | Doc—Com |





1  
2  
3  
4  
5  
6  
7  
8  
9  
10  
11  
12  
13  
14  
15  
16  
17  
18  
19  
20  
21  
22  
23  
24  
25  
26  
27  
28  
29  
30  
31  
32  
33  
34  
35  
36  
37  
38

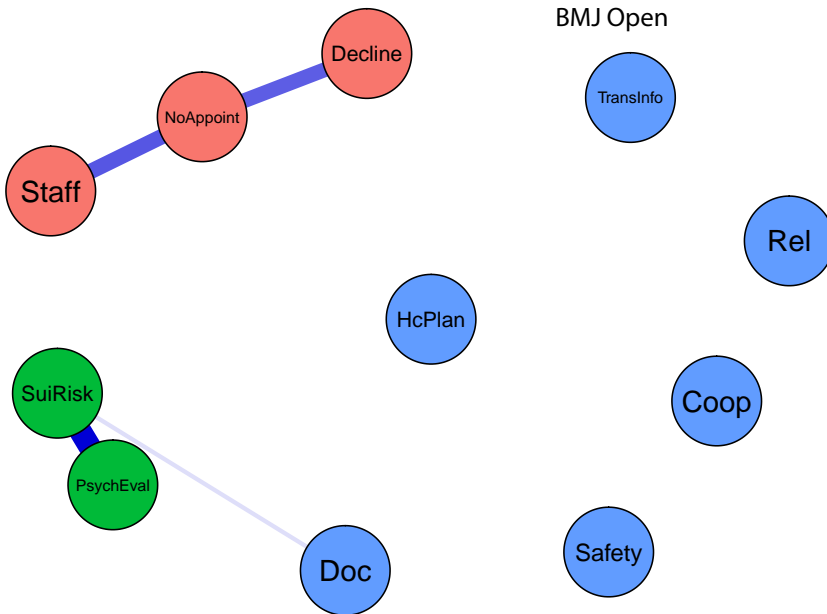

- Community 1
- Community 2
- Disconnected nodes

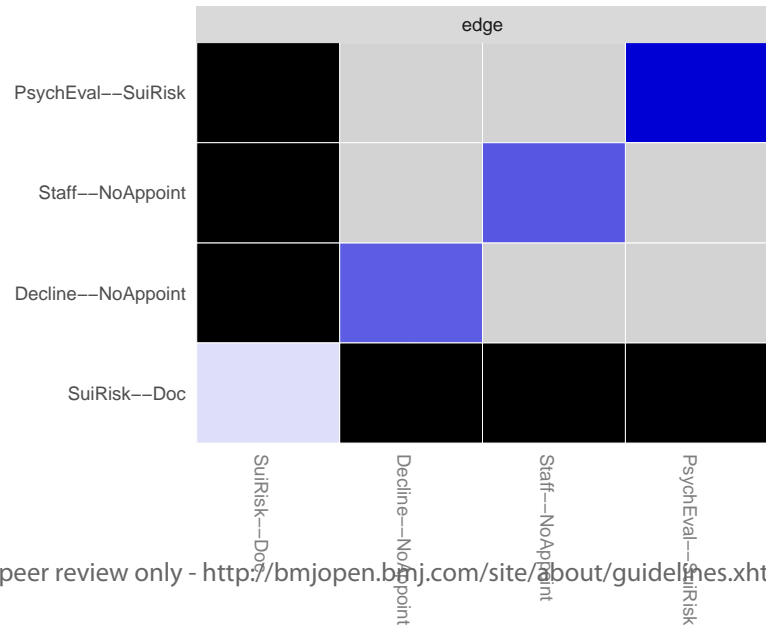

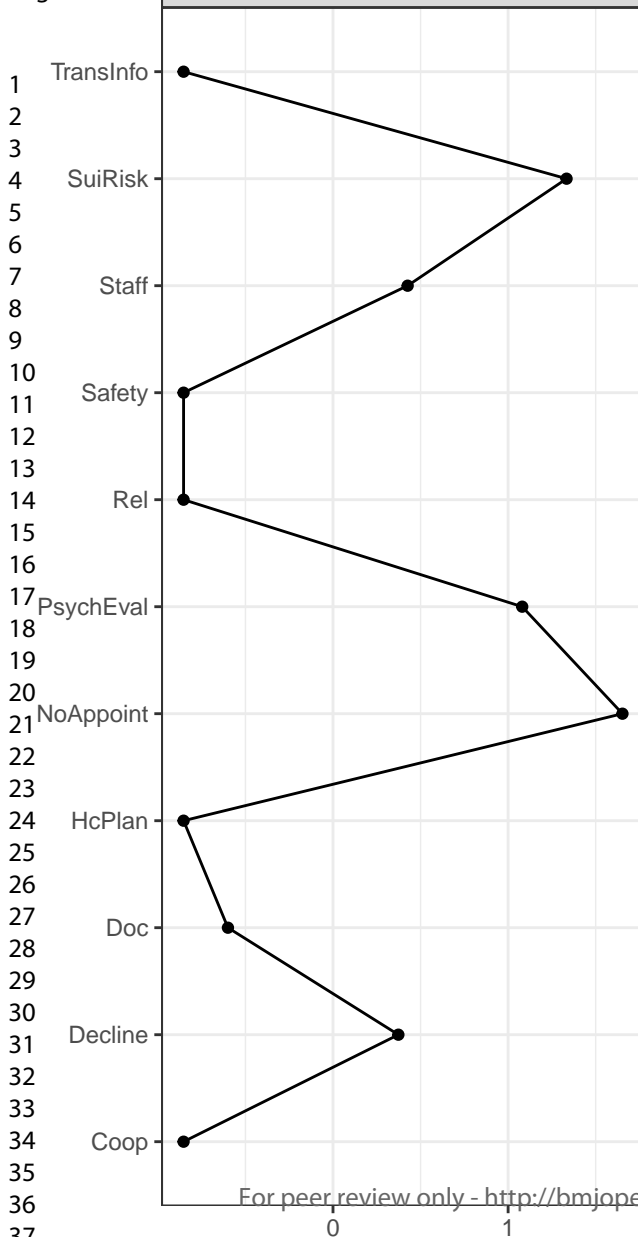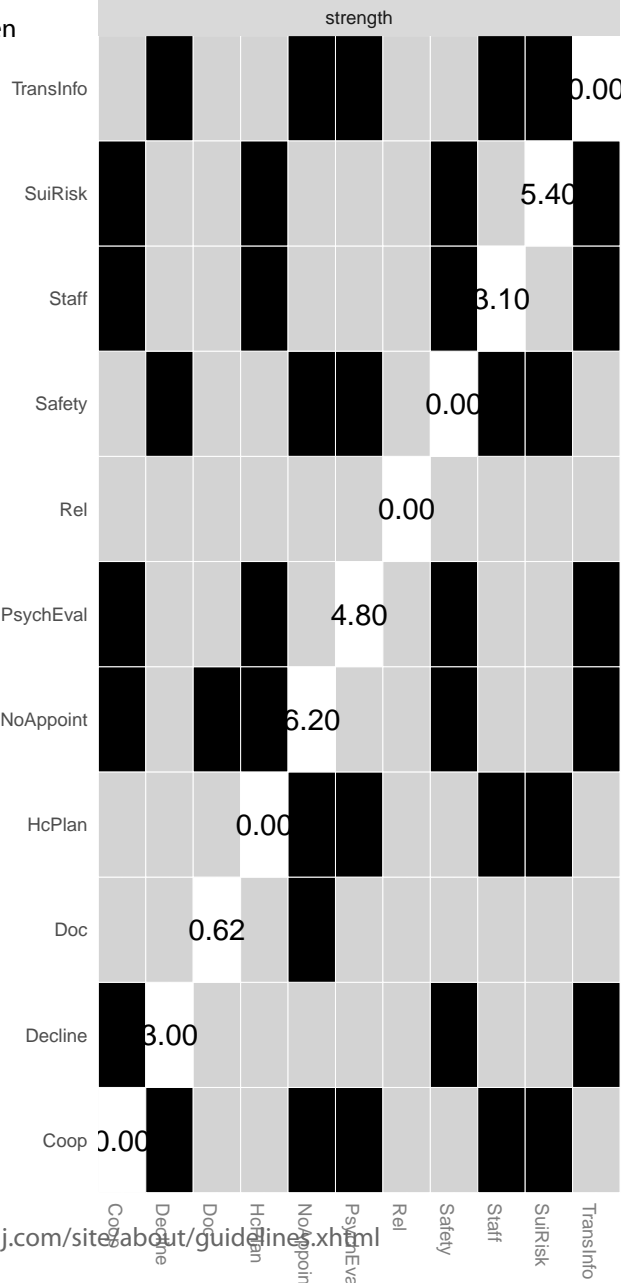

STROBE Statement—Checklist of items that should be included in reports of *cross-sectional studies*

|                              | Item No | Recommendation                                                                                                                                                                                    | Page          |
|------------------------------|---------|---------------------------------------------------------------------------------------------------------------------------------------------------------------------------------------------------|---------------|
| <b>Title and abstract</b>    | 1       | (a) Indicate the study's design with a commonly used term in the title or the abstract                                                                                                            | Title page    |
|                              |         | (b) Provide in the abstract an informative and balanced summary of what was done and what was found                                                                                               | 1-2           |
| <b>Introduction</b>          |         |                                                                                                                                                                                                   |               |
| Background/rationale         | 2       | Explain the scientific background and rationale for the investigation being reported                                                                                                              | 3-4           |
| Objectives                   | 3       | State specific objectives, including any prespecified hypotheses                                                                                                                                  | 4             |
| <b>Methods</b>               |         |                                                                                                                                                                                                   |               |
| Study design                 | 4       | Present key elements of study design early in the paper                                                                                                                                           | 4-8           |
| Setting                      | 5       | Describe the setting, locations, and relevant dates, including periods of recruitment, exposure, follow-up, and data collection                                                                   | 4-5           |
| Participants                 | 6       | (a) Give the eligibility criteria, and the sources and methods of selection of participants                                                                                                       | 4-5           |
| Variables                    | 7       | Clearly define all outcomes, exposures, predictors, potential confounders, and effect modifiers. Give diagnostic criteria, if applicable                                                          | 7-8           |
| Data sources/<br>measurement | 8*      | For each variable of interest, give sources of data and details of methods of assessment (measurement). Describe comparability of assessment methods if there is more than one group              | 6-7           |
| Bias                         | 9       | Describe any efforts to address potential sources of bias                                                                                                                                         | 6-8,<br>12-13 |
| Study size                   | 10      | Explain how the study size was arrived at                                                                                                                                                         | 4-5           |
| Quantitative variables       | 11      | Explain how quantitative variables were handled in the analyses. If applicable, describe which groupings were chosen and why                                                                      | 7-8           |
| Statistical methods          | 12      | (a) Describe all statistical methods, including those used to control for confounding                                                                                                             | 7-8           |
|                              |         | (b) Describe any methods used to examine subgroups and interactions                                                                                                                               | N/A           |
|                              |         | (c) Explain how missing data were addressed                                                                                                                                                       | 6             |
|                              |         | (d) If applicable, describe analytical methods taking account of sampling strategy                                                                                                                | N/A           |
|                              |         | (e) Describe any sensitivity analyses                                                                                                                                                             | 7-8           |
| <b>Results</b>               |         |                                                                                                                                                                                                   |               |
| Participants                 | 13*     | (a) Report numbers of individuals at each stage of study—eg numbers potentially eligible, examined for eligibility, confirmed eligible, included in the study, completing follow-up, and analysed | N/A           |
|                              |         | (b) Give reasons for non-participation at each stage                                                                                                                                              | N/A           |
|                              |         | (c) Consider use of a flow diagram                                                                                                                                                                | N/A           |
| Descriptive data             | 14*     | (a) Give characteristics of study participants (eg demographic, clinical, social) and information on exposures and potential confounders                                                          | 5-6           |
|                              |         | (b) Indicate number of participants with missing data for each variable of interest                                                                                                               | 5-6           |
| Outcome data                 | 15*     | Report numbers of outcome events or summary measures                                                                                                                                              | 8-10          |

1  
2  
3  
4  
5  
6  
7  
8  
9  
10  
11  
12  
13  
14  
15  
16  
17  
18  
19  
20  
21  
22  
23  
24  
25  
26  
27  
28  
29  
30  
31  
32  
33  
34  
35  
36  
37  
38  
39  
40  
41  
42  
43  
44  
45  
46  
47  
48  
49  
50  
51  
52  
53  
54  
55  
56  
57  
58  
59  
60

|                          |    |                                                                                                                                                                                                              |       |
|--------------------------|----|--------------------------------------------------------------------------------------------------------------------------------------------------------------------------------------------------------------|-------|
| Main results             | 16 | (a) Give unadjusted estimates and, if applicable, confounder-adjusted estimates and their precision (eg, 95% confidence interval). Make clear which confounders were adjusted for and why they were included | 9     |
|                          |    | (b) Report category boundaries when continuous variables were categorized                                                                                                                                    | N/A   |
|                          |    | (c) If relevant, consider translating estimates of relative risk into absolute risk for a meaningful time period                                                                                             | N/A   |
| Other analyses           | 17 | Report other analyses done—eg analyses of subgroups and interactions, and sensitivity analyses                                                                                                               | N/A   |
| <b>Discussion</b>        |    |                                                                                                                                                                                                              |       |
| Key results              | 18 | Summarise key results with reference to study objectives                                                                                                                                                     | 11    |
| Limitations              | 19 | Discuss limitations of the study, taking into account sources of potential bias or imprecision. Discuss both direction and magnitude of any potential bias                                                   | 13    |
| Interpretation           | 20 | Give a cautious overall interpretation of results considering objectives, limitations, multiplicity of analyses, results from similar studies, and other relevant evidence                                   | 11-13 |
| Generalisability         | 21 | Discuss the generalisability (external validity) of the study results                                                                                                                                        | 11-13 |
| <b>Other information</b> |    |                                                                                                                                                                                                              |       |
| Funding                  | 22 | Give the source of funding and the role of the funders for the present study and, if applicable, for the original study on which the present article is based                                                | 14    |

\*Give information separately for exposed and unexposed groups.

**Note:** An Explanation and Elaboration article discusses each checklist item and gives methodological background and published examples of transparent reporting. The STROBE checklist is best used in conjunction with this article (freely available on the Web sites of PLoS Medicine at <http://www.plosmedicine.org/>, Annals of Internal Medicine at <http://www.annals.org/>, and Epidemiology at <http://www.epidem.com/>). Information on the STROBE Initiative is available at [www.strobe-statement.org](http://www.strobe-statement.org).



### BMJ Open Influence

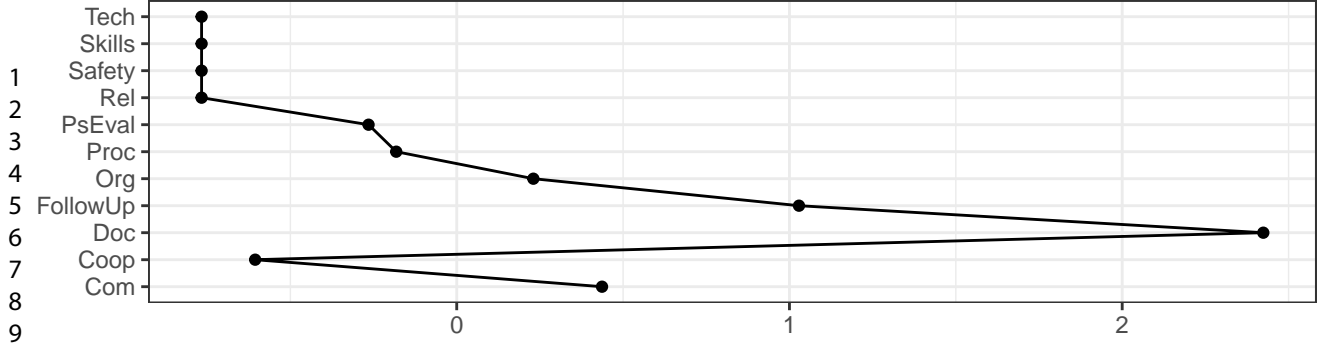

9

10

11

### Closeness

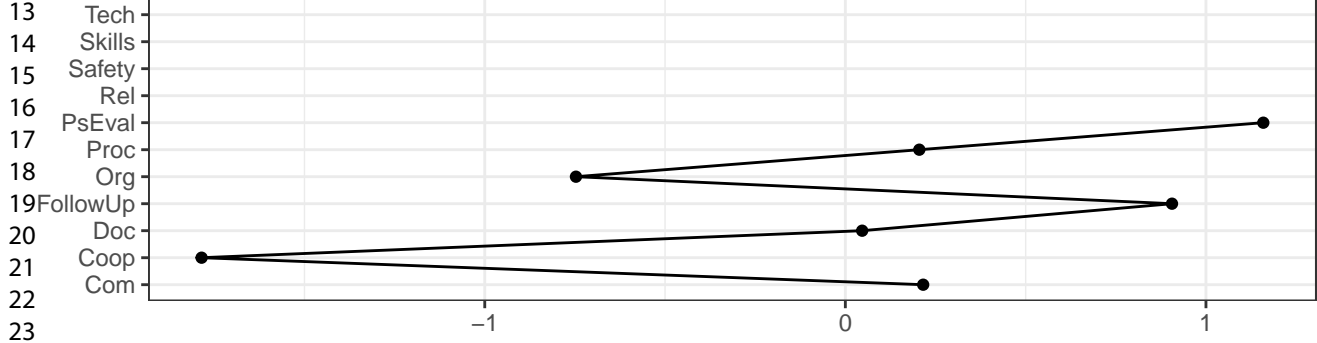

22

23

24

25

### Betweenness

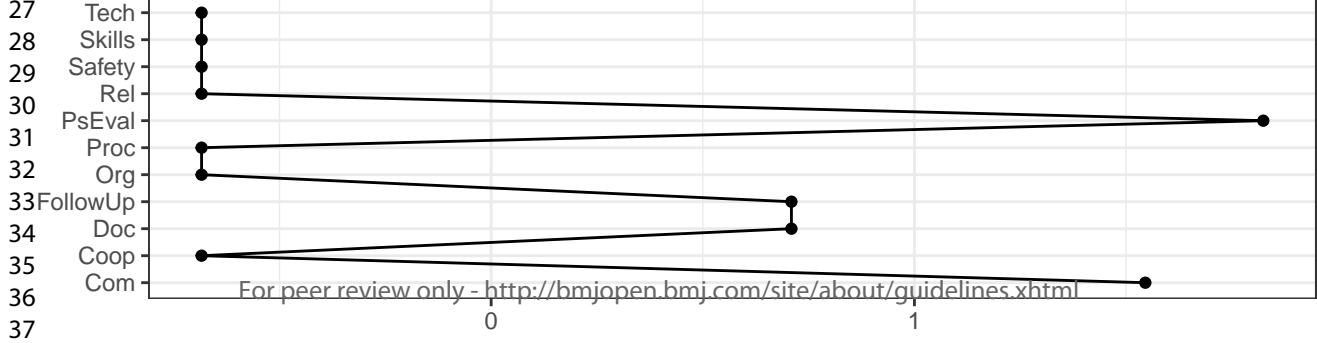

36

37

38

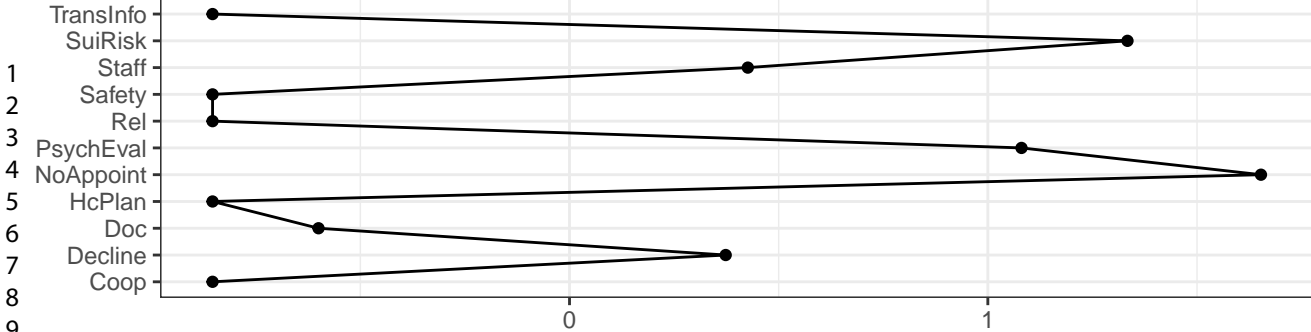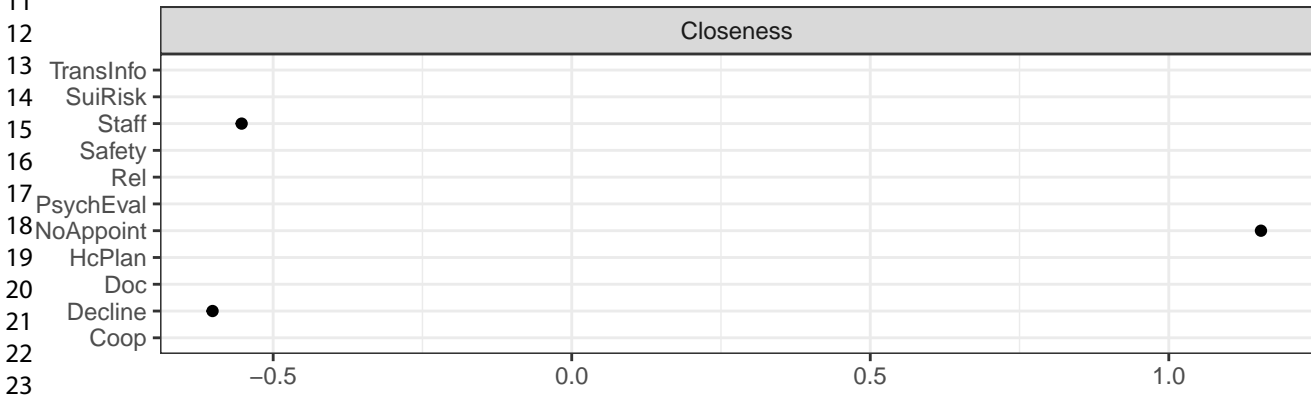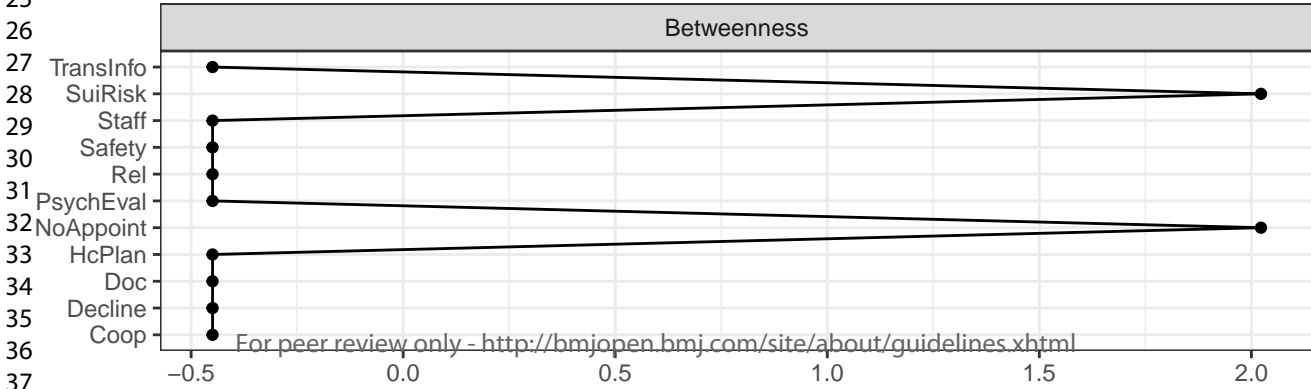

### BM Open Influence

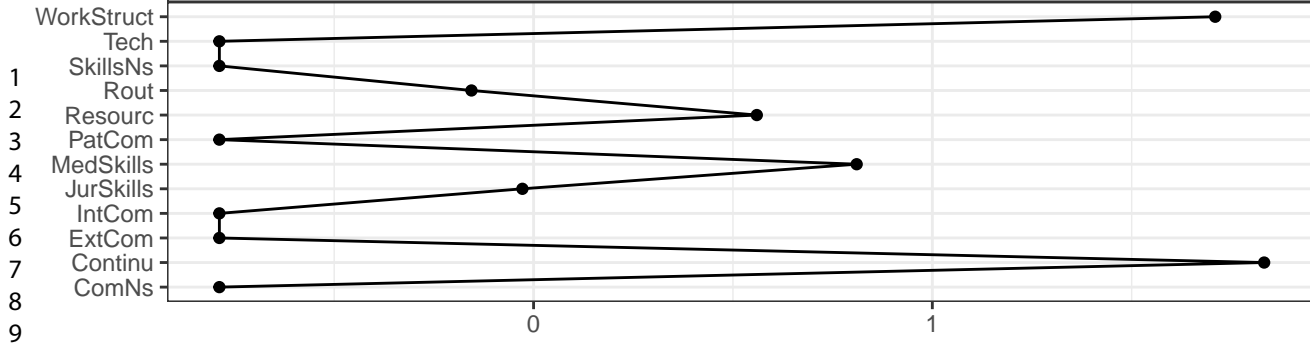

9

10

11

12

### Closeness

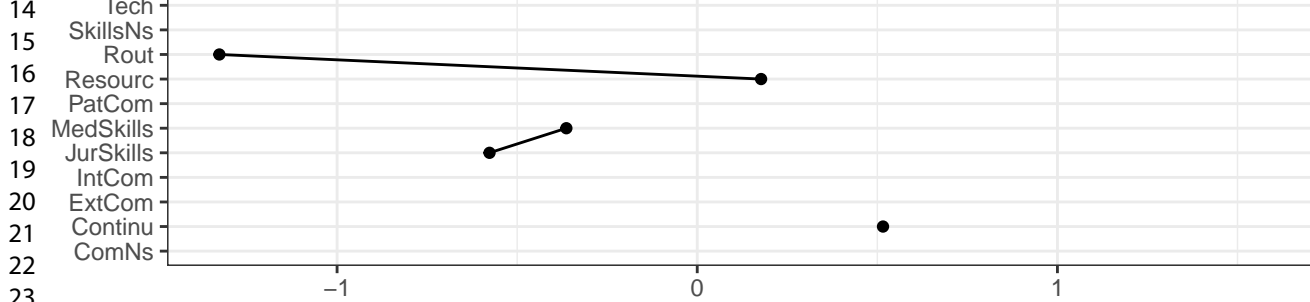

23

24

25

26

### Betweenness

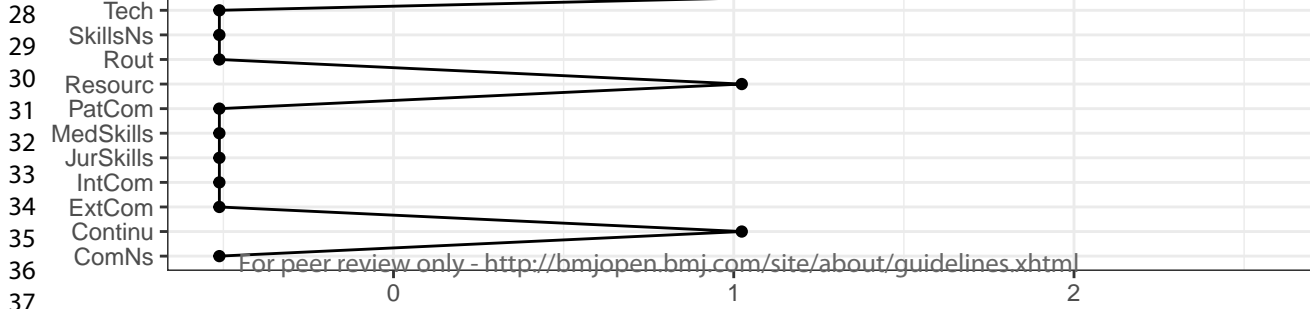

36

37

38



# BMJ Open

## Coexisting service-related factors preceding suicide: a network analysis

|                                 |                                                                                                                                                                                                                                                                                                                                                                                                                                                                                                                                                                                                                                                                                                                                                   |
|---------------------------------|---------------------------------------------------------------------------------------------------------------------------------------------------------------------------------------------------------------------------------------------------------------------------------------------------------------------------------------------------------------------------------------------------------------------------------------------------------------------------------------------------------------------------------------------------------------------------------------------------------------------------------------------------------------------------------------------------------------------------------------------------|
| Journal:                        | <i>BMJ Open</i>                                                                                                                                                                                                                                                                                                                                                                                                                                                                                                                                                                                                                                                                                                                                   |
| Manuscript ID                   | bmjopen-2021-050953.R2                                                                                                                                                                                                                                                                                                                                                                                                                                                                                                                                                                                                                                                                                                                            |
| Article Type:                   | Original research                                                                                                                                                                                                                                                                                                                                                                                                                                                                                                                                                                                                                                                                                                                                 |
| Date Submitted by the Author:   | 23-Feb-2022                                                                                                                                                                                                                                                                                                                                                                                                                                                                                                                                                                                                                                                                                                                                       |
| Complete List of Authors:       | Rex, Malin; University of Gothenburg, Institute of Health and Care Sciences, Sahlgrenska Academy; Sahlgrenska University Hospital, Affective clinic<br>Brezicka, Thomas; Sahlgrenska University Hospital, Department for quality and patient safety<br>Carlström, Eric; University of Gothenburg, Institute of Health and Care Sciences, Sahlgrenska Academy; University of Gothenburg, Centre for Person-Centred Care (GPCC)<br>Waern, Margda; University of Gothenburg, Institute of Neuroscience and Physiology, Sahlgrenska Academy; Sahlgrenska University Hospital, Psychosis Clinic<br>Ali, Lilas; University of Gothenburg, Institute of Health and Care Sciences, Sahlgrenska Academy; Sahlgrenska University Hospital, Affective Clinic |
| <b>Primary Subject Heading</b>: | Mental health                                                                                                                                                                                                                                                                                                                                                                                                                                                                                                                                                                                                                                                                                                                                     |
| Secondary Subject Heading:      | Mental health                                                                                                                                                                                                                                                                                                                                                                                                                                                                                                                                                                                                                                                                                                                                     |
| Keywords:                       | Suicide & self-harm < PSYCHIATRY, PSYCHIATRY, Risk management < HEALTH SERVICES ADMINISTRATION & MANAGEMENT, Quality in health care < HEALTH SERVICES ADMINISTRATION & MANAGEMENT, Health & safety < HEALTH SERVICES ADMINISTRATION & MANAGEMENT, Organisational development < HEALTH SERVICES ADMINISTRATION & MANAGEMENT                                                                                                                                                                                                                                                                                                                                                                                                                        |
|                                 |                                                                                                                                                                                                                                                                                                                                                                                                                                                                                                                                                                                                                                                                                                                                                   |

SCHOLARONE™  
Manuscripts



I, the Submitting Author has the right to grant and does grant on behalf of all authors of the Work (as defined in the below author licence), an exclusive licence and/or a non-exclusive licence for contributions from authors who are: i) UK Crown employees; ii) where BMJ has agreed a CC-BY licence shall apply, and/or iii) in accordance with the terms applicable for US Federal Government officers or employees acting as part of their official duties; on a worldwide, perpetual, irrevocable, royalty-free basis to BMJ Publishing Group Ltd ("BMJ") its licensees and where the relevant Journal is co-owned by BMJ to the co-owners of the Journal, to publish the Work in this journal and any other BMJ products and to exploit all rights, as set out in our [licence](#).

The Submitting Author accepts and understands that any supply made under these terms is made by BMJ to the Submitting Author unless you are acting as an employee on behalf of your employer or a postgraduate student of an affiliated institution which is paying any applicable article publishing charge ("APC") for Open Access articles. Where the Submitting Author wishes to make the Work available on an Open Access basis (and intends to pay the relevant APC), the terms of reuse of such Open Access shall be governed by a Creative Commons licence – details of these licences and which [Creative Commons](#) licence will apply to this Work are set out in our licence referred to above.

Other than as permitted in any relevant BMJ Author's Self Archiving Policies, I confirm this Work has not been accepted for publication elsewhere, is not being considered for publication elsewhere and does not duplicate material already published. I confirm all authors consent to publication of this Work and authorise the granting of this licence.

# Coexisting service-related factors preceding suicide: a network analysis

Malin Rex<sup>1,2</sup>, Thomas Brezicka<sup>4</sup>, Eric Carlström<sup>1,3</sup>, Margda Waern<sup>5,6</sup>, Lilas Ali<sup>1,2</sup>.

<sup>1</sup> University of Gothenburg, Institute of Health and Care Sciences, Sahlgrenska Academy Gothenburg, Region Västra Götaland, Sweden

<sup>2</sup> Sahlgrenska University Hospital, Affective clinic Gothenburg, Region Västra Götaland, Sweden

<sup>3</sup> University of Gothenburg, Centre for Person-Centred Care (GPCC) Gothenburg, Region Västra Götaland, Sweden

<sup>4</sup> Sahlgrenska University Hospital, Department for quality and patient safety Gothenburg, Region Västra Götaland, Sweden

<sup>5</sup> University of Gothenburg, Institute of Neuroscience and Physiology, Sahlgrenska Academy Gothenburg, Region Västra Götaland, Sweden

<sup>6</sup> Sahlgrenska University Hospital, Psychosis Clinic Gothenburg, Region Västra Götaland, Sweden

Correspondence to: Malin Rex

## POSTAL ADDRESS

University of Gothenburg, Institute of Health and Care Sciences  
Box 457  
405 30 Göteborg, Sweden

malin.rex@gu.se

+46-761199908

Keywords: Suicide, Patient safety, Network Analysis, Psychiatry, Mood disorders, Self-Injurious Behavior

## ABSTRACT

### Objectives

The overall objective was to analyse service-related factors involved in the complex processes that precede suicide in order to identify potential targets for intervention.

### Design and setting

Explorative network analysis study of post-suicide root cause analysis data from Swedish primary and secondary healthcare.

## Participants

217 suicide cases reported to the Swedish national root cause analysis database between 2012 and 2017.

## Primary and secondary outcome measures

A total of 961 reported incidents were included. Demographic data and frequencies of reported deficiencies were registered. Topology, centrality indices and communities were explored for three networks. All networks have been tested for robustness and accuracy.

## Results

Lack of follow-up, evaluations, and insufficient documentation issues emerged as central in the network of major themes, as did the contributing factors representing organizational problems, failing procedures and miscommunication. When analysing the subthemes of deficiencies more closely, disrupted treatments and staffing issues emerged as prominent features. The network covering the subthemes of contributing factors also highlighted discontinuity, fragile work structures, inadequate routines, and lack of resources and relevant competence as potential triggers. However, as the correlation stability coefficients for this network were low, the results need further investigation. Four communities were detected covering nodes for follow-up, evaluation, cooperation, and procedures; communication, documentation and organization; assessments of suicide risk and psychiatric status; and staffing, missed appointments and declined treatment.

## Conclusion

The results of this study suggest that healthcare providers may improve patient safety in suicide preventive pathways by taking active measures to provide regular follow-ups to patients with elevated suicide risk. In some cases, declined or cancelled appointments could be a warning sign. Tentative results show organizational instability, in terms of work structure, resources and staffing, as a potential target for intervention, although this must be more extensively explored in the future.

## SUMMARY - STRENGTHS AND LIMITATIONS OF THIS STUDY

- The data source was based on standardized reports performed by trained healthcare teams.
- The data were examined and categorized by four professionals, experienced in performing and peer-reviewing RCA reports.
- In addition to analysis of reported frequencies of adverse events, network analysis was applied.
- Each network has been tested for robustness and accuracy.
- The main limitation is that a relatively small proportion of all suicides were submitted to the national database.

## BACKGROUND

Suicide is one of the leading causes of death worldwide, affecting people of all ages, socio-economic groups, and cultures. More than 700 000 suicides (1.3 % of all deaths) occur globally each year, which exceeds the deaths due to malaria, HIV/AIDS, breast cancer, war and homicide. [1] For every completed suicide, there are indications of more than 20 other attempts.[2] Considering this and that the rate is markedly higher in people with psychiatric illness,[3-5] preventing suicide is a general priority in mental healthcare. Due to the complex and heterogenous nature of suicidal behavior, fluctuating levels of suicide intent and the lack of reliable assessment tools, suicide preventive decision making is difficult.[6-8] Clinical actions depend not only on the competence of individual healthcare professionals, but also on patient safety management on a structural level.[9]

Post-suicide reviews commonly use root cause analysis (RCA) to identify service-related risks.[10, 11] In Sweden, RCA has been a widespread method for investigating adverse events in healthcare for more than 15 years. The analyses are performed according to a standardized protocol by trained teams.[12] The RCA procedure has been exhaustively described elsewhere, [11, 13, 14] and the workflow of the Swedish RCA teams is identical to the steps listed there.[12] A short summary of the history of incident reporting and patient safety legislation in Sweden can be found in Fröding et al, (2021).[15]

Network analysis is an approach to statistically analyse and visualize core elements of a data set. Application spans from mathematics and physics to social sciences and psychology. The method is useful for modelling complex patterns among correlated variables.[16, 17] Over the last decade, a wide array of studies within the field of personality, psychopathology, and comorbidity has taken place.[16, 18-37]

## Previous research

Previous healthcare research on suicide prevention has focused mainly on single risk factors.[38, 39] Besides highlighting the importance of providing treatment to underlying illness, it stresses the reduction of accessibility to lethal means,[40-45] combining immediate and long-term multi-level interventions,[42, 43, 46, 47] building trustful staff–patient relationships and involving relatives,[48-50] conducting regular assessments in outpatient settings,[49, 51, 52] designing safer environments for inpatients,[53-56] following up earlier and maintaining closer supervision in the post-discharge period.[57-66] To reduce organizational risk factors, better communication among professionals, proper education and provision of adequate guidelines have been suggested.[15, 49, 52]

Previous studies based exclusively on post-suicide RCA material, including systematic reviews, meta-analyses, and observational studies from inpatient [45, 67] and outpatient settings,[62, 67] Veterans Health administration facilities [68-72] and nursing homes [67, 68] report inadequacies in cooperation,[62, 68-70, 72] accessibility to care,[45, 69] assessments of suicidal risk,[68-72] and follow-up[67] as the main deficiencies in suicide prevention.

Network analysis used in suicidal behaviour modelling suggests an association between suboptimal treatment of psychiatric illness and increased levels of suicidal ideation.[73-80] Feelings of thwarted belongingness,[74, 75] entrapment, hopelessness, and perceived burdensomeness[75, 77, 79, 81, 82] are also core phenomena of self-harm and suicidality. Physical illness, trauma, harassment and acute life stress due to economic or relational circumstances are examples of external individual factors associated with suicidal ideation.[76, 82, 83] Personalizing treatment strategies, for instance by using electronic devices for repeated ecological momentary assessment, has been suggested as an application of these findings.[73, 75, 84]

Network studies on service-related risk factors for suicides among persons in contact with health services are lacking. Therefore, this study aims to explore relationships of common deficiencies in healthcare preceding suicide, identify potential targets for clinical intervention and generate hypotheses for future research.

## METHODS

This study followed the guidelines of the STROBE (Strengthening the Reporting of Observational Studies in Epidemiology) checklist for reporting cross sectional studies (Supplement A).

## Material

The analysed material consists of 217 RCA reports concerning patient suicides uploaded to the Swedish national database for RCA (Nationellt IT-stöd för HändelseAnalyser - NITHA) from 2012 to 2017. The search criteria were: "Type of consequence: suicide/suicide attempt"; "death: yes". [85] Information in NITHA is anonymized, so we could not link any information to actual patient records. The reports were produced by RCA teams from 12 of Sweden's 21 regions. The teams consisted of 3-4 investigators trained in RCA methodology, who were responsible for data collection, identifying deficiencies, listing possible contributing factors, and proposing and evaluating adequate actions to avoid future recurrences. The data were collected from all data sources available to the team at the time of the investigation, including medical records, information from booking systems, data from external service settings, and qualitative data, such as interviews with healthcare professionals and interviews with relatives (64%, n = 139). The final reports varied in terms of scope and content. In some cases, particular facts about the medical condition or specific circumstances were omitted. Although we do not know the exact background to this, it may have been done to protect the integrity of those deceased. As we only had access to the final RCA reports, we have not been able to scrutinize how the RCA teams processed the original raw data.

## Suicide reports in the NITHA database

Table 1 shows the distribution of demographic characteristics among the included 217 patients, as stated by the RCA teams. For two persons, gender was reported as "other." Men were slightly overrepresented. Mood disorders were recorded as the most common type of primary diagnosis for both sexes. Approximately half were between the ages of 18 and 49, and half were in contact with psychiatric services at time of death. Mood disorders were recorded as the most common type of primary diagnosis for both sexes.

**Table 1. Patient demographics as reported to NITHA**

|                                                                                         | Total<br>N = 217 | Men<br>n = 125 | Women<br>n = 90 |
|-----------------------------------------------------------------------------------------|------------------|----------------|-----------------|
| <b>NUMBER OF DAYS SINCE LAST DOCUMENTED CONTACT WITH HEALTHCARE AND DATE OF SUICIDE</b> |                  |                |                 |
| Mean                                                                                    | 22.7             |                |                 |
| Median ± SD                                                                             | 4 ± 91           |                |                 |
| Min - Max                                                                               | 0-1124           |                |                 |
| <b>AGE</b>                                                                              |                  |                |                 |
| 7-17                                                                                    | 10               | 5              | 5               |
| 18-49                                                                                   | 109              | 61             | 48              |
| 50-64                                                                                   | 51               | 28             | 23              |

|                                                                                                       |    |    |    |
|-------------------------------------------------------------------------------------------------------|----|----|----|
| 65–74                                                                                                 | 28 | 18 | 10 |
| 75–84                                                                                                 | 14 | 10 | 4  |
| ≥85                                                                                                   | 2  | 2  | 0  |
| Missing/omitted data                                                                                  | 3  | 1  | 0  |
| <b>PRIMARY DIAGNOSIS</b>                                                                              |    |    |    |
| F0-F09 Organic, including symptomatic mental disorders                                                | 2  | 2  | 0  |
| F10-F19 Mental and behavioural disorders due to psychoactive substance use                            | 11 | 9  | 2  |
| F20-F29 Schizophrenia, schizotypal, and delusional disorders                                          | 29 | 18 | 11 |
| F30-F39 Mood (affective) disorders                                                                    | 92 | 53 | 38 |
| F40-F49 Neurotic, stress-related, and somatoform disorders                                            | 22 | 10 | 12 |
| F60-F69 Disorders of adult personality and behaviour                                                  | 10 | 2  | 7  |
| F90-F98 Behavioural and emotional disorders with onset usually occurring in childhood and adolescence | 12 | 5  | 7  |
| Missing/omitted data                                                                                  | 39 | 26 | 13 |
| <b>SETTING (DEFINED BY MEDICAL RECORDS)</b>                                                           |    |    |    |
| Primary care                                                                                          | 18 | 12 | 6  |
| Psychiatry, inpatient                                                                                 | 79 | 35 | 43 |
| Psychiatry outpatient                                                                                 | 58 | 41 | 16 |
| Medicine, inpatient                                                                                   | 17 | 13 | 4  |
| Medicine, outpatient                                                                                  | 2  | 2  | 0  |
| Missing data/omitted                                                                                  | 43 | 22 | 21 |

## Data extraction and processing

A data coding tool was developed to organize the data into inductively constructed categories. The original protocol was tested by two teams (CBC, MD and EvH, MR), and refined until consistent themes and subthemes had been identified. The team members had different professional backgrounds (two psychiatrists, one psychiatric nurse, and one psychologist) and were experienced in performing and peer-reviewing RCA reports at their own clinic. The teams worked independently but had regular meetings to discuss the data coding tool, which was audited by external reviewers and revised several times to cover all areas of interest in the RCAs. Every modification prompted a second review of previously reviewed cases. The final version of the data coding tool was used to derive data from all 217 cases. Data were double-checked for discrepancies; none were found in the final version of the dataset.

The two teams reviewed and coded all 217 RCA reports. The extracted raw data underwent a keyword-based sorting of text strings in Microsoft Excel 2016 before classification, resulting in 499 registered deficiencies and 462 underlying, contributing factors. In the original RCA terminology,



1  
2  
3 deficiencies are termed *adverse events*, and contributing factors *root causes*. Examples of typical  
4 cases are reported for each category in Table 2. While some minor misclassifications in the original  
5 data were noted by the research teams, terminology used in the original NITHA reports (including  
6 definition of missing data) was retained.  
7  
8  
9

10 In the original RCA reports each item could be reported multiple times. The range for some items  
11 varied from 1 to 6, depending on whether the RCA team had registered deficiencies in a merged or  
12 split form. To avoid skewed results, all observations were binarized (using the simple algorithm “IF  
13 count value  $\geq 0$ , THEN 1, ELSE 0”) before being entered into the network model.  
14  
15  
16

## 17 18 **Data analysis**

19  
20 The synthesized network model contains two elements: nodes (sometimes called vertices),  
21 representing variables, and edges (also called links) which represent pairwise association among  
22 nodes.[16, 82] The network can be either directed, displaying the influential effect from one node to  
23 another, or undirected, where mutual influences are indicated by a line between two nodes without  
24 any direction.[16] Centrality indices, such as strength, betweenness and expected influence, are  
25 employed to evaluate the network.[16, 86] An overview of different types of networks and applicable  
26 models has been published by Hevey, 2018.[23] For a further discussion on psychometrics and  
27 network estimation, we refer to previous researchers in this field.[31, 87-91]  
28  
29  
30  
31  
32  
33

34 Three networks were produced: one giving an overview of the major themes (Figure 1-2), another  
35 showing subthemes of deficiencies (Figure 3-4) and a third covering subthemes of contributing  
36 factors (Supplement B). Frequencies and percentages are reported for each variable (Table 2),  
37 alongside the centrality indices and stability measures (Figure 1-2). Data were analysed using IBM  
38 Statistical Package for the Social Sciences version 25 and R version 3.5.0 (bootnet package version  
39 1.4.3, ggplot2 version 3.3.5, igraph package version 1.2.6, qgraph package version 1.6.9, IsingFit  
40 package version 0.3.1).[92-98] To visualize the dependencies, we used an undirected network  
41 (formally called a pairwise Markov random field).[28, 88, 99] Relevant relationships among nodes  
42 were estimated using IsingFit package which uses an enhanced least absolute shrinkage and selection  
43 operator (eLASSO), based on the Ising Model. The operator reduces spurious edges by suppressing  
44 minimal connections to exactly zero. Selection is performed by combining logistic regression ( $\ell_1$ -  
45 regularized) and a model selection based on the Extended Bayesian Information Criterion (EBIC).[97]  
46 Since the network structures were sparse, the EBIC hyperparameter ( $\gamma$ ) was adjusted to 0 after  
47 careful consideration and comparisons of different settings. A  $\gamma$  set to 0 (can vary from 0 to 1, default  
48 is 0.25) results in a lower shrinkage of estimated connections. As simulation studies have shown, the  
49 likelihood of false positives is low and the specificity will still be higher compared to a non-  
50  
51  
52  
53  
54  
55  
56  
57  
58  
59  
60

1  
2  
3 regularized partial correlation network.[23, 89, 100] The estimated networks were then  
4 bootstrapped for accuracy and stability using the bootnet function, which performs a non-parametric  
5 bootstrap to calculate the 95% bootstrapped confidence intervals (CIs) for the edges by resampling  
6 the data with replacement 2500 times per network. The networks were visualised with the plotting  
7 tools in qgraph, using the force directed layout “spring”, which employs the Fruchterman-Reingold  
8 algorithm and draws nodes with higher centrality towards the center.[94, 101] Lastly, network  
9 communities were calculated using the walktrap algorithm and plotted with igraph, qgraph and  
10 ggplot2 plotting tools.[93, 95, 98] The data and R code necessary to reproduce our results can be  
11 found on The Open Science Framework repository.[102-105]  
12  
13  
14  
15  
16  
17  
18

### 19 **Patient and public involvement**

20 Neither patients nor the public were involved in this study.  
21  
22

## 23 **RESULTS**

### 24 **Frequencies and percentages of reported variables**

25  
26  
27  
28 Frequencies and percentages for identified categories of deficiencies and contributing factors are  
29 reported in Table 2.  
30  
31  
32  
33  
34  
35  
36  
37  
38  
39  
40  
41  
42  
43  
44  
45  
46  
47  
48  
49  
50  
51  
52  
53  
54  
55  
56  
57  
58  
59  
60

Table 2: Frequencies and percentages of reported variables.

| DEFICIENCIES n = 499 |                                               |                                                                                                                    |           |                                                                        |                                                                                                                  |                   | CONTRIBUTING FACTORS n = 462 |                                              |            |                                                                      |                                                                                                                                                                                        |                   |
|----------------------|-----------------------------------------------|--------------------------------------------------------------------------------------------------------------------|-----------|------------------------------------------------------------------------|------------------------------------------------------------------------------------------------------------------|-------------------|------------------------------|----------------------------------------------|------------|----------------------------------------------------------------------|----------------------------------------------------------------------------------------------------------------------------------------------------------------------------------------|-------------------|
| Node ID              | Major theme                                   | Description                                                                                                        | Node ID   | Subtheme                                                               | Example                                                                                                          | Frequencies n (%) | Node ID                      | Major theme                                  | Node ID    | Subtheme                                                             | Example                                                                                                                                                                                | Frequencies n (%) |
| FollowUp             | Follow-up, continuity, and planning (n = 145) | Planning medical and non-medical treatment, health care, related problems, and continuity issues                   | NoAppoint | Treatment not scheduled or follow-up is not provided by next caregiver | Missed booking of future appointments.                                                                           | 89 (18)           | Proc                         | Procedures, routines, and policies (n = 224) | Rout       | Routine matters                                                      | Applicable routines were missing, incomplete or unknown to the coworkers.                                                                                                              | 224 (48)          |
|                      |                                               |                                                                                                                    | HcPlan    | Deficiencies in healthcare plan                                        | Missing info about objectives, strategies or planned interventions.                                              | 40 (8)            |                              |                                              |            |                                                                      |                                                                                                                                                                                        |                   |
|                      |                                               |                                                                                                                    | Decline   | Patient declined contact                                               | Patient had missed or declined an upcoming appointment.                                                          | 16 (3)            |                              |                                              |            |                                                                      |                                                                                                                                                                                        |                   |
| PsEval               | Psychiatric evaluation (n = 149)              | Regular assessment of mental health status and suicide risk                                                        | SuiRisk   | Assessment of suicide risk                                             | Suicide risk had not been evaluated.                                                                             | 77 (15)           | Org                          | Organizational issues (n = 93)               | Continu    | Discontinuity issues                                                 | Instability in primary healthcare contact person.                                                                                                                                      | 22 (5)            |
|                      |                                               |                                                                                                                    | PsychEval | Evaluation of general mental condition                                 | No evaluation of psychiatric status had taken place for a substantial period of time (defined by the RCA teams). | 72 (14)           |                              |                                              | WorkStruct | Suboptimal work structure                                            | Discrepancies among the coworkers about the concept of which tasks to execute, and how to execute them. Newly recruited coworkers were not properly introduced to tasks or procedures. | 25 (5)            |
|                      |                                               |                                                                                                                    | Resourc   | Lack of available resources                                            | Shortages of hardware or software.                                                                               | 46 (10)           |                              |                                              |            |                                                                      |                                                                                                                                                                                        |                   |
| Coop                 | Cooperation (n = 112)                         | External or internal cooperation and shortages of shared resources such as staffing, hardware, software, or spaces | Coop      | Suboptimal cooperation and/or responsibility issues                    | Unclear delimitation of responsibility.                                                                          | 86 (17)           | Com                          | Communication and information (n = 68)       | ExtCom     | Suboptimal communication w. external unit                            | Insufficient communication among multiple involved units, for instance during transition from inpatient to outpatient services.                                                        | 28 (6)            |
|                      |                                               |                                                                                                                    | Staff     | Deficiencies in staffing, etc.                                         | Understaffing.                                                                                                   | 26 (5)            |                              |                                              | ComNs      | Administrative matters and/or unspecified other communication issues | Information was lost due to local administrative procedures. This category also includes cases where communication issues without any further specification were reported.             | 24 (5)            |

|    |               |                               |                                                                                                                   |           |                                                                                                          |                                                                                                                                            |        |               |                                          |           |                                                                  |                                                                                                                                                                                                             |                                          |
|----|---------------|-------------------------------|-------------------------------------------------------------------------------------------------------------------|-----------|----------------------------------------------------------------------------------------------------------|--------------------------------------------------------------------------------------------------------------------------------------------|--------|---------------|------------------------------------------|-----------|------------------------------------------------------------------|-------------------------------------------------------------------------------------------------------------------------------------------------------------------------------------------------------------|------------------------------------------|
| 1  | <b>Doc</b>    | <b>Documentation (n = 78)</b> | Identifying discrepancies in documentation and transfer of information                                            | Doc       | Assessment not recorded                                                                                  | According to interviews, assessments were made but had not been recorded.                                                                  | 41 (8) |               |                                          | PatCom    | Insufficient communication w. patients or relatives              | Patients and/or relatives had not been provided with information about important details concerning future treatment.                                                                                       | 10 (2)                                   |
| 2  |               |                               |                                                                                                                   | TransInfo | Suboptimal transfer of information                                                                       | Important information was lost during referral or similar.                                                                                 | 37 (7) |               |                                          | IntCom    | Suboptimal internal communication                                | Miscommunication among team members at a single unit.                                                                                                                                                       | 6 (1)                                    |
| 3  | <b>Safety</b> | <b>Safety issues (n = 9)</b>  | Assessing risk of violence, need for extra monitoring, or possession of weapons; confiscation of means of suicide | Safety    | Incomplete screening of means of suicide, risk of violence, need of extra monitoring and/or use of drugs | Patient had access to drugs or weapons. Patient in need of constant surveillance was left unattended.                                      | 9 (2)  | <b>Skills</b> | <b>Competence and education (n = 62)</b> | MedSkills | Lack of competence regarding medical condition or level of risk  | Due to insufficient training or experience, the coworkers did not respond adequately to acute signs of progress in severe somatic or psychiatric illness, leading to an undertreatment of these conditions. | 23 (5)                                   |
| 4  |               |                               |                                                                                                                   |           |                                                                                                          |                                                                                                                                            |        |               |                                          | JurSkills | Lack of competence regarding juridical or organizational matters | Regulations regarding <i>The Compulsory Mental Care Act</i> (Swedish law 1991:1128) were not applied appropriately.                                                                                         | 17 (4)                                   |
| 5  |               |                               |                                                                                                                   |           |                                                                                                          |                                                                                                                                            |        |               |                                          | SkillsNs  | Unspecified competence issues                                    | Includes cases where the RCA team had identified deficiencies related to competence, but where no further specification had been made.                                                                      | 22 (5)                                   |
| 6  |               |                               |                                                                                                                   |           |                                                                                                          |                                                                                                                                            |        |               |                                          | Tech      | <b>Technical equipment and systems (n = 15)</b>                  | Tech                                                                                                                                                                                                        | Malfunctional design of devices or rooms |
| 7  | <b>Rel</b>    | <b>Relatives (n = 6)</b>      | Engaging relatives in the patient's care                                                                          | Rel       | Absent/insufficient interaction with relatives                                                           | Relatives had not been contacted or invited to participate in planning of the care, despite the lack of formal hindrance to participation. | 6 (1)  |               |                                          |           |                                                                  |                                                                                                                                                                                                             |                                          |
| 8  |               |                               |                                                                                                                   |           |                                                                                                          |                                                                                                                                            |        |               |                                          |           |                                                                  |                                                                                                                                                                                                             |                                          |
| 9  |               |                               |                                                                                                                   |           |                                                                                                          |                                                                                                                                            |        |               |                                          |           |                                                                  |                                                                                                                                                                                                             |                                          |
| 10 |               |                               |                                                                                                                   |           |                                                                                                          |                                                                                                                                            |        |               |                                          |           |                                                                  |                                                                                                                                                                                                             |                                          |
| 11 |               |                               |                                                                                                                   |           |                                                                                                          |                                                                                                                                            |        |               |                                          |           |                                                                  |                                                                                                                                                                                                             |                                          |
| 12 |               |                               |                                                                                                                   |           |                                                                                                          |                                                                                                                                            |        |               |                                          |           |                                                                  |                                                                                                                                                                                                             |                                          |
| 13 |               |                               |                                                                                                                   |           |                                                                                                          |                                                                                                                                            |        |               |                                          |           |                                                                  |                                                                                                                                                                                                             |                                          |
| 14 |               |                               |                                                                                                                   |           |                                                                                                          |                                                                                                                                            |        |               |                                          |           |                                                                  |                                                                                                                                                                                                             |                                          |
| 15 |               |                               |                                                                                                                   |           |                                                                                                          |                                                                                                                                            |        |               |                                          |           |                                                                  |                                                                                                                                                                                                             |                                          |
| 16 |               |                               |                                                                                                                   |           |                                                                                                          |                                                                                                                                            |        |               |                                          |           |                                                                  |                                                                                                                                                                                                             |                                          |
| 17 |               |                               |                                                                                                                   |           |                                                                                                          |                                                                                                                                            |        |               |                                          |           |                                                                  |                                                                                                                                                                                                             |                                          |
| 18 |               |                               |                                                                                                                   |           |                                                                                                          |                                                                                                                                            |        |               |                                          |           |                                                                  |                                                                                                                                                                                                             |                                          |
| 19 |               |                               |                                                                                                                   |           |                                                                                                          |                                                                                                                                            |        |               |                                          |           |                                                                  |                                                                                                                                                                                                             |                                          |
| 20 |               |                               |                                                                                                                   |           |                                                                                                          |                                                                                                                                            |        |               |                                          |           |                                                                  |                                                                                                                                                                                                             |                                          |
| 21 |               |                               |                                                                                                                   |           |                                                                                                          |                                                                                                                                            |        |               |                                          |           |                                                                  |                                                                                                                                                                                                             |                                          |
| 22 |               |                               |                                                                                                                   |           |                                                                                                          |                                                                                                                                            |        |               |                                          |           |                                                                  |                                                                                                                                                                                                             |                                          |
| 23 |               |                               |                                                                                                                   |           |                                                                                                          |                                                                                                                                            |        |               |                                          |           |                                                                  |                                                                                                                                                                                                             |                                          |
| 24 |               |                               |                                                                                                                   |           |                                                                                                          |                                                                                                                                            |        |               |                                          |           |                                                                  |                                                                                                                                                                                                             |                                          |
| 25 |               |                               |                                                                                                                   |           |                                                                                                          |                                                                                                                                            |        |               |                                          |           |                                                                  |                                                                                                                                                                                                             |                                          |
| 26 |               |                               |                                                                                                                   |           |                                                                                                          |                                                                                                                                            |        |               |                                          |           |                                                                  |                                                                                                                                                                                                             |                                          |
| 27 |               |                               |                                                                                                                   |           |                                                                                                          |                                                                                                                                            |        |               |                                          |           |                                                                  |                                                                                                                                                                                                             |                                          |
| 28 |               |                               |                                                                                                                   |           |                                                                                                          |                                                                                                                                            |        |               |                                          |           |                                                                  |                                                                                                                                                                                                             |                                          |
| 29 |               |                               |                                                                                                                   |           |                                                                                                          |                                                                                                                                            |        |               |                                          |           |                                                                  |                                                                                                                                                                                                             |                                          |
| 30 |               |                               |                                                                                                                   |           |                                                                                                          |                                                                                                                                            |        |               |                                          |           |                                                                  |                                                                                                                                                                                                             |                                          |
| 31 |               |                               |                                                                                                                   |           |                                                                                                          |                                                                                                                                            |        |               |                                          |           |                                                                  |                                                                                                                                                                                                             |                                          |
| 32 |               |                               |                                                                                                                   |           |                                                                                                          |                                                                                                                                            |        |               |                                          |           |                                                                  |                                                                                                                                                                                                             |                                          |
| 33 |               |                               |                                                                                                                   |           |                                                                                                          |                                                                                                                                            |        |               |                                          |           |                                                                  |                                                                                                                                                                                                             |                                          |
| 34 |               |                               |                                                                                                                   |           |                                                                                                          |                                                                                                                                            |        |               |                                          |           |                                                                  |                                                                                                                                                                                                             |                                          |
| 35 |               |                               |                                                                                                                   |           |                                                                                                          |                                                                                                                                            |        |               |                                          |           |                                                                  |                                                                                                                                                                                                             |                                          |
| 36 |               |                               |                                                                                                                   |           |                                                                                                          |                                                                                                                                            |        |               |                                          |           |                                                                  |                                                                                                                                                                                                             |                                          |
| 37 |               |                               |                                                                                                                   |           |                                                                                                          |                                                                                                                                            |        |               |                                          |           |                                                                  |                                                                                                                                                                                                             |                                          |
| 38 |               |                               |                                                                                                                   |           |                                                                                                          |                                                                                                                                            |        |               |                                          |           |                                                                  |                                                                                                                                                                                                             |                                          |
| 39 |               |                               |                                                                                                                   |           |                                                                                                          |                                                                                                                                            |        |               |                                          |           |                                                                  |                                                                                                                                                                                                             |                                          |
| 40 |               |                               |                                                                                                                   |           |                                                                                                          |                                                                                                                                            |        |               |                                          |           |                                                                  |                                                                                                                                                                                                             |                                          |
| 41 |               |                               |                                                                                                                   |           |                                                                                                          |                                                                                                                                            |        |               |                                          |           |                                                                  |                                                                                                                                                                                                             |                                          |
| 42 |               |                               |                                                                                                                   |           |                                                                                                          |                                                                                                                                            |        |               |                                          |           |                                                                  |                                                                                                                                                                                                             |                                          |
| 43 |               |                               |                                                                                                                   |           |                                                                                                          |                                                                                                                                            |        |               |                                          |           |                                                                  |                                                                                                                                                                                                             |                                          |
| 44 |               |                               |                                                                                                                   |           |                                                                                                          |                                                                                                                                            |        |               |                                          |           |                                                                  |                                                                                                                                                                                                             |                                          |
| 45 |               |                               |                                                                                                                   |           |                                                                                                          |                                                                                                                                            |        |               |                                          |           |                                                                  |                                                                                                                                                                                                             |                                          |
| 46 |               |                               |                                                                                                                   |           |                                                                                                          |                                                                                                                                            |        |               |                                          |           |                                                                  |                                                                                                                                                                                                             |                                          |

1  
2  
3  
4  
5  
6  
7  
8  
9  
10  
11  
12  
13  
14  
15  
16  
17  
18  
19  
20  
21  
22  
23  
24  
25  
26  
27  
28  
29  
30  
31  
32  
33  
34  
35  
36  
37  
38  
39  
40  
41  
42  
43  
44  
45  
46  
47  
48  
49  
50  
51  
52  
53  
54  
55  
56  
57  
58  
59  
60

Deficiencies (499 in total) were identified and classified under six major themes. The three most frequently reported categories concerned psychiatric evaluation, follow-up and cooperation. Typical cases involved patients who were referred from inpatient to outpatient services or changes in primary clinical contacts, both of which could result in missed appointments or incomplete assessments of health status. In 27 percent of the cases involving follow-up, healthcare planning that could have provided a framework for treatment during the transition was also lacking. 76 percent of the deficiencies categorised as problems in cooperation were linked to unclear delimitation of responsibility. Lack of adequate information was also a relatively common explanatory factor and was identified in 15 percent of all cases. In contrast, deficiencies concerning safety and relatives were rare.

In line with the structure of the RCA protocol, the 462 contributing factors formed five major themes (Table 2). Nearly half of the factors pointed towards failing procedures, routines, or guidelines as contributors. Examples included poor compliance to, or insufficient knowledge about an existing policy, or lack of guidelines that could be applied in a specific context. Suboptimal work structures, communication problems, and insufficient competence regarding medical, juridical, or organizational matters were also reported as common.

### Network stability

Correlation stability coefficients (CS-coefficients) denote the estimated maximum number of cases that can be dropped from the data to retain a correlation of at least 0.7 between statistics, based on the original network data and statistics computed with fewer cases (with 95% probability). The coefficient should not be below 0.25 and is preferably above 0.5.[88, 106] The CS-coefficients for each of the three networks (the major network, Deficiencies network, and Contributing factors network) are shown Table 3. As CS-coefficients for the Contributing factors network were below the cut-off value, indicating instability, further investigations are required before any final conclusions can be drawn. [88] The visualization of this network is included in Supplement B, along with the centrality indices calculated for this subset.

**Table 3: CS-coefficients for each network (cut-off = 0.25).**

| Centrality index | Major network | Deficiencies network | Contributing factors network |
|------------------|---------------|----------------------|------------------------------|
| Edge             | 0.75          | 0.594                | 0.13                         |
| Closeness        | 0             | 0                    | 0                            |
| Betweenness      | 0             | 0                    | 0                            |

|                    |      |       |      |
|--------------------|------|-------|------|
| Expected Influence | 0.75 | 0.594 | 0    |
| Intercept          | 0.21 | 0.438 | 0.52 |
| Strength           | 0.75 | 0.594 | 0    |

### Central and peripheral nodes in the network

The centrality indices node strength and edge strength were included to quantify impact on each network structure. Node strength is defined as the total sum of the magnitude of each of its edges. Edge strength in a partial correlation or regularized network reflects the magnitude of the pairwise relationship between two nodes, while controlling for indirect influences via other nodes.[23, 89] The centrality indices closeness, betweenness and expected influence (EI) were examined, but excluded from the main section of this paper as the CS-coefficients for closeness and betweenness were below cut-off and EI did not add anything to the interpretation that was not already explained by node strength. Calculated values for these indices are included in Supplement C-E.

[Please insert Figure 1 here.]

The major network and significant differences of edges are shown in Figure 1.

[Please insert Figure 2 here.]

As shown in both Figure 1 and Figure 2, nodes representing documentation, communication, organization, follow-up, procedures and psychiatric evaluation were central, compared to nodes related to safety, competence, contact with relatives, technical issues and cooperation. Although the nodes involved in this subset all scored high in strength, two negative connections were found: 1) between organization and communication, and 2) between psychiatric evaluation and procedures, which may reflect how data were registered by the RCA teams.

[Please insert Figure 3 here.]

In the Deficiencies network (Figure 3), missed appointments, particularly the absence of booked follow-ups but also cancellations made by the patient, scored high in node strength. Consequently, missed assessments of suicide risk and continuous re-evaluation of the psychiatric status, were also central, along with the node representing shortages in staff.

[Please insert Figure 4 here.]

In relation to these nodes, the nodes representing administrative problems, such as missed referrals or other types of transferred information, safety issues, suboptimal contact with relatives, healthcare

1  
2  
3 plan being either absent or incomplete, and assessment not being recorded were more peripheral  
4 (Figure 4.)  
5

6  
7 The third network, representing contributing factors, was too instable to estimate. Although the  
8 nodes for work structure, resources, competence, and continuity had the highest node strength  
9 centrality, the differences were not significant. Our recommendations are to examine these more  
10 thoroughly in a future study with a larger sample. The topology and centrality indices for the  
11 Contributing factors network are shown in Supplement B.  
12  
13  
14

### 15 16 **Detected communities**

17 Communities were detected using the walktrap algorithm.[93] The nodes belonging to a community  
18 are color marked in the visualizations of the networks in Figure 1 and Figure 2.  
19

20  
21  
22 Two communities were present in the major network (Figure 1):  
23

24 1) the nodes for the deficiencies psychiatric evaluation, follow-up, and the contributing factor for  
25 procedures, routines, and policies.  
26

27  
28 2) the nodes for the deficiency communication and the nodes representing the contributing factors  
29 organization and communication.  
30

31  
32 Analysis of the Deficiencies network (Fig. 2) resulted in two detected communities. The first included  
33 the nodes representing understaffing, declined/missed appointments, and cases where future  
34 appointments had not been booked. The second covered the nodes representing assessments of  
35 suicide risk and of the overall mental condition.  
36  
37  
38

## 39 40 **DISCUSSION**

41 The results of this study suggest that reported adversities are linked to a group of activities, rather  
42 than to single mistakes. Providing suicidal patients with regular assessments, for instance, and  
43 proposing adequate actions depends not only on the personal conditions of the evaluating clinician  
44 and the patient being assessed, but also on proper work structures, good intrateam communication,  
45 adequate routines and well-known procedures, and sufficient documentation of planned and  
46 performed activities.  
47  
48  
49

50  
51  
52 There are three main findings of this study. First, missed and declined appointments are central  
53 features when examining elements occurring prior to the suicide. Together they account for a fifth of  
54 the total amount of deficiencies. We have not examined the positive effects of feedback loop  
55 systems which enhances the ability for healthcare providers to react when a patient does not turn up  
56 on scheduled meetings. Nor have we investigated cases with negative correlations between  
57  
58  
59  
60

1  
2  
3 treatment cancellations and suicide. However, one hypothesis drawn from our results and  
4 extrapolated conclusions from previous studies,[51, 52, 57, 58, 60-63, 65-72] is that any disruption in  
5 treatment is negative, and cancellations made by the patient could be an early warning sign of an  
6 ongoing exacerbation of the suicidal process. During phases of acute suicidality or in the early stages  
7 of recovery from a suicide attempt, the wellbeing of the patient is frail, and the suicide risk may  
8 fluctuate rapidly.[58, 61, 64-66] Establishing a backup system, which safeguards follow-up plans and  
9 alerts healthcare staff when patients cancel planned appointments, could help improve patient  
10 safety. Second, many nodes are still disconnected. Even if it is likely that there is an underlying  
11 covariance, the correlation is not independently significant. The sparsity of the networks could be  
12 explained by the estimation procedure. Each network has been regularized to reduce false positive  
13 connections and produce parsimonious graphs. When comparing them with networks based on  
14 partial correlation matrices, many edges have been omitted due to the penalization. It is therefore  
15 likely that other patterns would appear if more data were entered. Third, the nodes representing  
16 security, technical issues and contact with relatives have both low frequencies and low centrality.  
17 This means that adversities related to these areas are rarely reported. One reason for this can be the  
18 very nature of the type of failures that can occur in these areas. Denied access to an important  
19 medical record system at a specific time rarely affects more than one or a few team members at a  
20 time. Ligature points, once removed, do not reappear at the exact same location. Establishing and  
21 maintaining stable work conditions, on the other hand, is more elusive. The concept of organizational  
22 prerequisites to provide safe interventions to suicidal patients is subjective which could lead to a  
23 higher rate of recurrences of management related issues. While adverse events concerning security  
24 at the inpatient facilities were rare, the transition to outpatient services was frequently mentioned in  
25 the post-mortem audits. Transitions imply a change in primary caregiver and a shift from short-term  
26 to long-term treatment goals. A connection to elevated risk levels could be expected, although the  
27 direct relationship has not been investigated in this study. To gain more knowledge about the  
28 mechanisms involved, network studies covering these steps of the process are needed. Even though  
29 interviews with relatives were included in 64 % of the reports, their perspective were only reflected  
30 in 1 % of the deficiencies (Table 2). This situation has been previously described by Bouwman et al.  
31 (2018). After examining policies from 15 healthcare organizations and spoken to 35 stakeholders  
32 (including patient, families and their counsellors, national regulators and professionals) they  
33 concluded that involvement by relatives, insofar they had been involved, rarely extended beyond  
34 aftercare and information provision.[50] With this in mind, studies based on the narratives of  
35 relatives would probably complement and enrich our results.  
36  
37  
38  
39  
40  
41  
42  
43  
44  
45  
46  
47  
48  
49  
50  
51  
52  
53  
54  
55  
56  
57  
58  
59  
60



1  
2  
3 We acknowledge that from a general point of view, some of our findings are similar to the  
4 conclusions drawn by our colleagues in the same field. Suicide risk is multifactorial, and decisions  
5 about appropriate safety measures are dependent on factors on both individual and structural  
6 levels.[5, 6, 10, 38, 40, 42, 44, 46, 48, 49, 51, 53-55, 57, 58, 60-64, 66, 68-70] However, following the  
7 argumentation of Fried and Robinaugh (2021) on complexity, adverse events cannot be prevented by  
8 understanding the single components alone, neglecting the interactions among them.[107] If the  
9 value of a unique node is determined not only by the intrinsic properties of the node itself, but by its  
10 relations to other objects, the study of single factors will not yield any ultimate answers about how  
11 to prevent undesired events. To gain more knowledge, we must first examine the dynamics of the  
12 systems from which adversity arises.

## 21 CONCLUSION

22 Network analysis adds to previous research in patient safety by elucidating patterns which may be  
23 unclear if only incident rate is considered. The results shows that failed assessments and cancelled  
24 treatments during follow-up are both frequent and have a high centrality, thus functioning as a  
25 warning sign for exacerbation. Organizational instability, in terms of understaffing, shortages of  
26 resources and suboptimal work procedures are also prominent features of the networks. Although  
27 comparative studies are needed before any final conclusions can be drawn, focusing on these areas  
28 may improve patient safety in suicide prevention.

## 35 STRENGTHS AND LIMITATIONS

36 Strengths of the study include data collected from NITHA, the only open national resource in Sweden  
37 for the dissemination of RCA reports. These reports were produced in a standardized manner by  
38 trained RCA teams. The data were examined and categorized by four professionals, all experienced in  
39 performing and peer-reviewing RCA reports. Considering the dynamic nature of deficiencies in  
40 healthcare where underlying factors are rarely sharply outlined, but rather multi-layered, network  
41 analysis can bring new and valuable insights of risk-prone areas.

42 The study also has several limitations. This was a cross-sectional study, limiting the capacity to  
43 identify the directions of effects. Since we obtained our data exclusively through the NITHA system,  
44 other post-suicide investigations were not included. Because regional institutional praxis concerning  
45 submission to the NITHA database varied, RCA reports cannot be considered representative for the  
46 country of Sweden. A relatively small proportion of all suicides were submitted to the database, and  
47 therefore selection bias cannot be ruled out. The RCA methodology is designed to scrutinize  
48 organizations and detect possible causes for systematic negative output. Consequently, the reported  
49 findings may focus on incidental discoveries, rather than some latent factor which lies beyond the  
50  
51  
52  
53  
54  
55  
56  
57  
58  
59  
60

1  
2  
3 scope of the protocol. Moreover, since RCA aims to identify organizational vulnerabilities, the reports  
4 lack certain details concerning the patients themselves. As we did not have access to original records,  
5 we have not been able to verify the accuracy of the content in the RCA reports. Therefore, our  
6 findings will reflect any misclassification done by the RCA teams during the initial investigation  
7 process. Lastly, the classification tool used by the auditing teams has not been validated by  
8 independent reviewers. The data were qualitatively categorized and could have been organized  
9 differently.  
10  
11  
12  
13  
14  
15

## 16 **FUTURE RESEARCH**

17 Based on the findings of this study, we suggest further research on security systems which help  
18 healthcare providers to react when patients drop out of treatment. Considering the relatively low  
19 number of observations, we also recommend future network studies based on a larger sample. To  
20 gain more insights into the perspectives of patients and relatives, network studies based on their  
21 experiences would be a fruitful approach.  
22  
23  
24  
25

## 26 **ACKNOWLEDGEMENTS**

27 The authors would like to express their gratitude to Cecilia Boldt-Christmas, Marzia Dellepiane, and  
28 Evalena von Hausswolff who participated in the data extraction and coding.  
29  
30  
31

## 32 **CONTRIBUTORS**

33 MR designed the study, collected and registered the data, performed the analyses, and drafted the  
34 manuscript. EC, LA, MW, and TB contributed to the study design, analyses, and manuscript revision.  
35 All authors read and approved the final manuscript.  
36  
37  
38  
39

## 40 **COMPETING INTERESTS**

41 There are no competing interests for any author.  
42  
43  
44  
45

## 46 **FUNDING**

47 This work was supported by the Affective Clinic, Sahlgrenska University Hospital, Gothenburg, Region  
48 Västra Götaland (no specific grant number).  
49  
50  
51

## 52 **DATA AVAILABILITY STATEMENT**

53 Copies of used R scripts and data sets can be found in our repository at Open Science Framework:  
54 DOI 10.17605/OSF.IO/3DHTF  
55  
56  
57  
58  
59  
60

## ETHICAL REVIEW

According to the Swedish Act Concerning the Ethical Review of Research Involving Humans (2003:460), this study did not require ethical review as it did not involve living human participants.

For peer review only

## REFERENCES

1. World Health Organization. Suicide worldwide in 2019: global health estimates. Geneva: World Health Organization; 2021. Available from: <https://www.who.int/publications/i/item/9789240026643> (accessed October 19, 2021).
2. World Health Organization. Preventing suicide: a global imperative. 2014. Available from: [http://apps.who.int/iris/bitstream/handle/10665/131056/9789241564779\\_eng.pdf?sequence=1](http://apps.who.int/iris/bitstream/handle/10665/131056/9789241564779_eng.pdf?sequence=1) (accessed January 19, 2019).
3. Ropper AH, Fazel S, Runeson B. Suicide. *The New England Journal of Medicine*. 2020;382(3):266-74.
4. Too LS, Spittal MJ, Bugeja L, et al. The association between mental disorders and suicide: A systematic review and meta-analysis of record linkage studies. *J Affect Disord*. 2019;259:302-13.
5. Runeson B, Haglund A, Lichtenstein P, et al. Suicide risk after nonfatal self-harm: a national cohort study, 2000-2008. *J Clin Psychiatry*. 2016;77(2):240-6.
6. Large M, Sharma S, Cannon E, et al. Risk Factors for Suicide Within a Year of Discharge from Psychiatric Hospital: A Systematic Meta-Analysis. *Aust N Z J Psychiatry*. 2011;45(8):619-28.
7. Waern M, Kaiser N, Renberg ES. Psychiatrists' experiences of suicide assessment. *BMC Psychiatry*, 2016, Vol 16. 2016;16.
8. Steeg S, Quinlivan L, Nowland R, et al. Accuracy of risk scales for predicting repeat self-harm and suicide: a multicentre, population-level cohort study using routine clinical data.(Report). *BMC Psychiatry*. 2018;18(1).
9. Smith MJ, Bouch J, Bradstreet S, et al. Health services, suicide, and self-harm: patient distress and system anxiety. *Lancet Psychiatry*. 2015;2(3):275-80.

10. Hoffmire C, Stephens B, Morley S, et al. VA Suicide Prevention Applications Network: A National Health Care System–Based Suicide Event Tracking System. *Public Health Rep.* 2016;131(6):816-21.
11. Clarke I. Learning from critical incidents. *Advances in Psychiatric Treatment.* 2018;14(6):460-8.
12. Ericsson C, Hessel Å. *Risikanalys och händelseanalys: analysmetoder för att öka patientsäkerheten : handbok* [Risk analysis and Root Cause Analysis: analysis methods to improve patient safety: handbook]. Stockholm: Sveriges kommuner och landsting; 2015. Available from: <http://webbutik.skl.se/sv/artiklar/risikanalys-och-handelseanalys-analysmetoder-for-att-oka-patientsakerheten.html> (accessed October 19, 2021).
13. Bowie P, Skinner J, de Wet C. Training health care professionals in root cause analysis: a cross-sectional study of post-training experiences, benefits and attitudes. *BMC Health Serv Res.* 2013;13:50-.
14. Aboumradi M, Neily J, Watts BV. Teaching Root Cause Analysis Using Simulation: Curriculum and Outcomes. *Journal of medical education and curricular development.* 2019;6:2382120519894270-.
15. Fröding E, Gäre BA, Westrin Å, et al. Suicide as an incident of severe patient harm: a retrospective cohort study of investigations after suicide in Swedish healthcare in a 13-year perspective. *BMJ Open.* 2021;11(3):e044068.
16. Newman M. *Networks.* Oxford: Oxford: Oxford University Press; 2018.
17. Luke DA, Harris JK. Network Analysis in Public Health: History, Methods, and Applications. *Annu Rev Public Health.* 2007;28(1):69-93.
18. Borsboom D. Psychometric perspectives on diagnostic systems. *J Clin Psychol.* 2008;64(9):1089-108.
19. Borsboom D, Cramer AO. Network analysis: an integrative approach to the structure of psychopathology. *Annu Rev Clin Psychol.* 2013;9:91-121.

- 1  
2  
3  
4 20. Schmittmann VD, Cramer AOJ, Waldorp LJ, et al. Deconstructing the  
5  
6 construct: A network perspective on psychological phenomena. *New*  
7  
8 *Ideas Psychol.* 2013;31(1):43-53.
- 9  
10 21. van der Maas HL, Dolan CV, Grasman RP, et al. A dynamical model of  
11  
12 general intelligence: the positive manifold of intelligence by mutualism.  
13  
14 *Psychol Rev.* 2006;113(4):842-61.
- 15  
16 22. Cramer AOJ, Waldorp LJ, van der Maas HLJ, et al. Comorbidity: A  
17  
18 network perspective. *The Behavioral and brain sciences.* 2010;33(2-  
19  
20 3):15-150.
- 21  
22 23. Hevey D. Network analysis: a brief overview and tutorial. *Health*  
23  
24 *Psychology and Behavioral Medicine.* 2018;6(1):301-28.
- 25  
26 24. Beard C, Millner A, Forgeard M, et al. Network analysis of depression  
27  
28 and anxiety symptom relationships in a psychiatric sample. *Psychol*  
29  
30 *Med.* 2016;46(16):3359-69.
- 31  
32 25. Fried EI, van Borkulo CD, Cramer AOJ, et al. Mental disorders as  
33  
34 networks of problems: a review of recent insights. *Soc Psychiatry*  
35  
36 *Psychiatr Epidemiol.* 2017;52(1):1-10.
- 37  
38 26. Fried EI, Bockting C, Arjadi R, et al. From Loss to Loneliness: The  
39  
40 Relationship Between Bereavement and Depressive Symptoms. *Journal*  
41  
42 *of abnormal psychology (1965).* 2015;124(2):256-65.
- 43  
44 27. Borsboom D, Cramer AOJ, Schmittmann VD, et al. The small world of  
45  
46 psychopathology. *PLoS One.* 2011;6(11):e27407-e.
- 47  
48 28. Borsboom D, Deserno MK, Rhemtulla M, et al. Network analysis of  
49  
50 multivariate data in psychological science. *Nature Reviews Methods*  
51  
52 *Primers.* 2021;1(1):58.
- 53  
54 29. Bringmann LF, Lemmens LHJM, Huibers MJH, et al. Revealing the  
55  
56 dynamic network structure of the Beck Depression Inventory-II. *Psychol*  
57  
58 *Med.* 2015;45(4):747-57.
- 59  
60

- 1  
2  
3  
4 30. Costantini G, Epskamp S, Borsboom D, et al. State of the aRt  
5  
6  
7  
8  
9  
10  
11  
12  
13  
14  
15  
16  
17  
18  
19  
20  
21  
22  
23  
24  
25  
26  
27  
28  
29  
30  
31  
32  
33  
34  
35  
36  
37  
38  
39  
40  
41  
42  
43  
44  
45  
46  
47  
48  
49  
50  
51  
52  
53  
54  
55  
56  
57  
58  
59  
60  
31. Costantini G, Richetin J, Preti E, et al. Stability and variability of  
personality networks. A tutorial on recent developments in network  
psychometrics. *Pers Individ Dif*. 2019;136:68-78.
32. Cramer AOJ, van der Sluis S, Noordhof A, et al. Dimensions of Normal  
Personality as Networks in Search of Equilibrium: You Can't Like Parties  
if You Don't Like People. *European Journal of Personality*.  
2012;26(4):414-31.
33. Forkmann T, Teismann T, Stenzel J-S, et al. Defeat and entrapment:  
more than meets the eye? Applying network analysis to estimate  
dimensions of highly correlated constructs.(Report). *BMC Med Res  
Methodol*. 2018;18(1).
34. Richetin J, Preti E, Costantini G, et al. The centrality of affective  
instability and identity in Borderline Personality Disorder: Evidence from  
network analysis. *PLoS One*. 2017;12(10).
35. Isvoranu A-M, Abidin E, Chong SA, et al. Extended network analysis:  
from psychopathology to chronic illness. *BMC Psychiatry*.  
2021;21(1):119-.
36. Isvoranu A-M, van Borkulo CD, Boyette L-L, et al. A Network Approach  
to Psychosis: Pathways Between Childhood Trauma and Psychotic  
Symptoms. *Schizophr Bull*. 2017;43(1):187-96.
37. Köhne ACJ, Isvoranu A-M. A Network Perspective on the Comorbidity of  
Personality Disorders and Mental Disorders: An Illustration of  
Depression and Borderline Personality Disorder. *Front Psychol*.  
2021;12:680805-.
38. Cheng A, Chen T, Chen CC, et al. Psychosocial and psychiatric risk  
factors for suicide: case-control psychological autopsy study. *Br J  
Psychiatry*. 2000(177):360-5.



- 1  
2  
3  
4 39. Berman AL, Silverman MM. Suicide Risk Assessment and Risk  
5 Formulation Part II : Suicide Risk Formulation and the Determination of  
6 Levels of Risk. *Suicide and Life-Threatening Behavior*. 2014;44(4):432-  
7 43.  
8  
9
- 10  
11 40. Pirkis J, Too LS, Spittal MJ, et al. Interventions to reduce suicides at  
12 suicide hotspots: a systematic review and meta-analysis. *Lancet*  
13 *Psychiatry*. 2015;2(11):994-1001.  
14  
15
- 16 41. Barker E, Kolves K, De Leo D. Rail-suicide prevention: Systematic  
17 literature review of evidence-based activities. *Asia-Pacific Psychiatry*.  
18 2017;9(3):e12246.  
19  
20
- 21 42. Zalsman G, Hawton K, Wasserman D, et al. Suicide prevention  
22 strategies revisited: 10-year systematic review. *Lancet Psychiatry*.  
23 2016;3(7):646-59.  
24  
25
- 26 43. Zalsman G, Hawton K, Wasserman D, et al. Evidence-based national  
27 suicide prevention taskforce in Europe: A consensus position paper. *Eur*  
28 *Neuropsychopharmacol*. 2017;27(4):418-21.  
29  
30
- 31 44. Mann JJ, Apter A, Bertolote J, et al. Suicide prevention strategies: a  
32 systematic review. *JAMA*. 2005;294(16):2064-74.  
33  
34
- 35 45. Vine R, Mulder C. After an inpatient suicide: the aim and outcome of  
36 review mechanisms. *Australasian Psychiatry*. 2013;21(4):359-64.  
37  
38
- 39 46. Meerwijk EL, Parekh A, Oquendo MA, et al. Direct versus indirect  
40 psychosocial and behavioural interventions to prevent suicide and  
41 suicide attempts: a systematic review and meta-analysis. *Lancet*  
42 *Psychiatry*. 2016;3(6):544-54.  
43  
44
- 45 47. Sakashita T, Oyama H. Overview of community-based studies of  
46 depression screening interventions among the elderly population in  
47 Japan. *Aging Ment Health*. 2016;20(2):231-9.  
48  
49
- 50 48. Cole-King A, Parker V, Williams H, et al. Suicide prevention: are we  
51 doing enough? *Advances in Psychiatric Treatment*. 2018;19(4):284-91.  
52  
53  
54  
55  
56  
57  
58  
59  
60



- 1  
2  
3  
4 49. Huisman A, Kerkhof AJFM, Robben PBM. Suicides in users of mental  
5 health care services: treatment characteristics and hindsight reflections.  
6  
7 *Suicide Life Threat Behav.* 2011;41(1):41.
- 8  
9 50. Bouwman R, De Graaff B, De Beurs D, et al. Involving Patients and  
10 Families in the Analysis of Suicides, Suicide Attempts, and Other  
11 Sentinel Events in Mental Healthcare: A Qualitative Study in The  
12 Netherlands. *Int J Environ Res Public Health.* 2018;15(6):1104.
- 13  
14 51. Burgess P, Pirkis J, Morton J, et al. Lessons From a Comprehensive  
15 Clinical Audit of Users of Psychiatric Services Who Committed Suicide.  
16  
17 *Psychiatr Serv.* 2000;51(12):1555-60.
- 18  
19 52. Roos af Hjelmsäter E, Ros A, Gäre BA, et al. Deficiencies in healthcare  
20 prior to suicide and actions to deal with them: a retrospective study of  
21 investigations after suicide in Swedish healthcare. *BMJ Open.*  
22  
23 2019;9(12):e032290.
- 24  
25 53. Large M, Smith G, Sharma S, et al. Systematic review and meta-  
26 analysis of the clinical factors associated with the suicide of psychiatric  
27 in-patients. *Acta Psychiatr Scand.* 2011;124(1):18-9.
- 28  
29 54. Meehan J, Kapur N, Hunt I, et al. Suicide in Mental Health In-Patients  
30 and within 3 Months of Discharge. *The British Journal of Psychiatry.*  
31  
32 2006;188(2):129-34.
- 33  
34 55. Changchien T-C, Yen Y-C, Wang Y-J, et al. Establishment of a  
35 Comprehensive Inpatient Suicide Prevention Network by Using Health  
36 Care Failure Mode and Effect Analysis. *Psychiatr Serv.* 2019;70(6):518-  
37  
38 21.
- 39  
40 56. Williams SC, Schmaltz SP, Castro GM, et al. Incidence and Method of  
41 Suicide in Hospitals in the United States. *The Joint Commission Journal*  
42  
43 *on Quality and Patient Safety.* 2018;44(11):643-50.
- 44  
45 57. Iliachenko EK, Ragazan DC, Eberhard J, et al. Suicide mortality after  
46 discharge from inpatient care for bipolar disorder: A 14-year Swedish  
47 national registry study. *J Psychiatr Res.* 2020;127:20-7.
- 48  
49  
50  
51  
52  
53  
54  
55  
56  
57  
58  
59  
60

- 1  
2  
3  
4 58. Haglund A, Lysell H, Larsson H, et al. Suicide Immediately After  
5 Discharge From Psychiatric Inpatient Care: A Cohort Study of Nearly 2.9  
6 Million Discharges. *The Journal of clinical psychiatry*. 2019;80(2).  
7  
8  
9 59. Appleby L, Dennehy JA, Thomas CS, et al. Aftercare and clinical  
10 characteristics of people with mental illness who commit suicide: a case-  
11 control study. *The Lancet*. 1999;353(9162):1397-400.  
12  
13 60. Qin P, Nordentoft M. Suicide Risk in Relation to Psychiatric  
14 Hospitalization: Evidence Based on Longitudinal Registers. *JAMA*  
15 *Psychiatry*. 2005;62(4):427-32.  
16  
17 61. Chung D, Hadzi-Pavlovic D, Wang M, et al. Meta-analysis of suicide  
18 rates in the first week and the first month after psychiatric  
19 hospitalisation. *BMJ Open*. 2019;9(3).  
20  
21 62. Riblet VN, Shiner RB, Watts RB, et al. Death by Suicide Within 1 Week  
22 of Hospital Discharge: A Retrospective Study of Root Cause Analysis  
23 Reports. *The Journal of Nervous and Mental Disease*. 2017;205(6):436-  
24 42.  
25  
26 63. Valenstein M, Kim HM, Ganoczy D, et al. Higher-risk periods for suicide  
27 among VA patients receiving depression treatment: Prioritizing suicide  
28 prevention efforts. *J Affect Disord*. 2009;112(1):50-8.  
29  
30 64. Bickley H, Hunt IM, Windfuhr K, et al. Suicide Within Two Weeks of  
31 Discharge From Psychiatric Inpatient Care: A Case-Control Study.  
32 *Psychiatr Serv*. 2013;64(7):653-9.  
33  
34 65. Appleby L, Dennehy JA, Thomas CS, et al. Aftercare and clinical  
35 characteristics of people with mental illness who commit suicide: a case-  
36 control study. *The Lancet (British edition)*. 1999;353(9162):1397-400.  
37  
38 66. Chung DT, Ryan CJ, Hadzi-Pavlovic D, et al. Suicide Rates After  
39 Discharge From Psychiatric Facilities: A Systematic Review and Meta-  
40 analysis  
41 Suicide Rates After Discharge From Psychiatric Facilities  
42 Suicide Rates After Discharge From Psychiatric Facilities. *JAMA Psychiatry*.  
43 2017;74(7):694-702.  
44  
45  
46  
47  
48  
49  
50  
51  
52  
53  
54  
55  
56  
57  
58  
59  
60

- 1  
2  
3  
4 67. Gillies D, Chicop D, O'Halloran P. Root Cause Analyses of Suicides of  
5 Mental Health Clients. *Crisis: The Journal of Crisis Intervention and*  
6 *Suicide Prevention*. 2015;36(5):316-24.  
7  
8  
9 68. Mills PD, Gallimore BI, Watts BV, et al. Suicide attempts and  
10 completions in Veterans Affairs nursing home care units and long-term  
11 care facilities: a review of root-cause analysis reports. *Int J Geriatr*  
12 *Psychiatry*. 2016;31(5):518-25.  
13  
14 69. Mills PD, Huber SJ, Vince Watts B, et al. Systemic vulnerabilities to  
15 suicide among veterans from the Iraq and Afghanistan Conflicts: review  
16 of case reports from a National Veterans Affairs Database. *Suicide Life*  
17 *Threat Behav*. 2011;41(1):21-32.  
18  
19 70. Mills PD, Neily J, Luan D, et al. Actions and implementation strategies to  
20 reduce suicidal events in the Veterans Health Administration. *Jt Comm J*  
21 *Qual Patient Saf*. 2006;32(3):130-41.  
22  
23 71. Mills PD, Watts BV, Shiner B, et al. Adverse events occurring on mental  
24 health units. *Gen Hosp Psychiatry*. 2018;50:63-8.  
25  
26 72. Aboumrad M, Shiner B, Riblet N, et al. Factors contributing to cancer-  
27 related suicide: A study of root-cause analysis reports. *Psychooncology*.  
28 2018;27(9):2237-44.  
29  
30 73. de Beurs D. Network Analysis: A Novel Approach to Understand  
31 Suicidal Behaviour. *Int J Environ Res Public Health*. 2017;14(3):219.  
32  
33 74. Gijzen MWM, Rasing SPA, Creemers DHM, et al. Suicide ideation as a  
34 symptom of adolescent depression. a network analysis. *J Affect Disord*.  
35 2021;278:68-77.  
36  
37 75. Rath D, de Beurs D, Hallensleben N, et al. Modelling suicide ideation  
38 from beep to beep: Application of network analysis to ecological  
39 momentary assessment data. *Internet Interventions*. 2019;18:100292.  
40  
41 76. Shiratori Y, Tachikawa H, Nemoto K, et al. Network analysis for motives  
42 in suicide cases: A cross-sectional study. *Psychiatry Clin Neurosci*.  
43 2014;68(4):299-307.  
44  
45  
46  
47  
48  
49  
50  
51  
52  
53  
54  
55  
56  
57  
58  
59  
60

- 1  
2  
3  
4 77. De Beurs D, Fried EI, Wetherall K, et al. Exploring the psychology of  
5 suicidal ideation: A theory driven network analysis. *Behav Res Ther.*  
6 2019;120:103419.  
7  
8  
9 78. Núñez D, Ulloa JL, Guillaume S, et al. Suicidal ideation and affect lability  
10 in single and multiple suicidal attempters with Major Depressive  
11 Disorder: An exploratory network analysis. *J Affect Disord.*  
12 2020;272:371-9.  
13  
14  
15  
16 79. Bloch-Elkouby S, Gorman B, Schuck A, et al. The Suicide Crisis  
17 Syndrome: A Network Analysis. *J Couns Psychol.* 2020;67(5):595-607.  
18  
19  
20 80. Núñez D, Fresno A, van Borkulo CD, et al. Examining relationships  
21 between psychotic experiences and suicidal ideation in adolescents  
22 using a network approach. *Schizophr Res.* 2018;201:54-61.  
23  
24  
25  
26 81. De Beurs D, Fried EI, Wetherall K, et al. Exploring the psychology of  
27 suicidal ideation: A theory driven network analysis. *Behaviour research*  
28 *and therapy.* 2019;120.  
29  
30  
31  
32 82. de Beurs D, Vancayseele N, van Borkulo C, et al. The association  
33 between motives, perceived problems and current thoughts of self-harm  
34 following an episode of self-harm. A network analysis. *J Affect Disord.*  
35 2018;240:262-70.  
36  
37  
38  
39 83. Simons JS, Simons RM, Walters KJ, et al. Nexus of despair: A network  
40 analysis of suicidal ideation among veterans. *Archives of suicide*  
41 *research.* 2020;24(sup1):314-36.  
42  
43  
44  
45 84. de Beurs DP, van Borkulo CD, O'Connor RC. Association between  
46 suicidal symptoms and repeat suicidal behaviour within a sample of  
47 hospital-treated suicide attempters. *BJPsych Open.* 2017;3(3):120-6.  
48  
49  
50 85. Inera. *Nationellt IT-stöd för händelseanalyser - NITHA Kunskapsbank*  
51 [National database for root cause analyses]. October 19, 2021.  
52 Available from: <https://nitha.inera.se/Learn>.  
53  
54  
55  
56  
57  
58  
59  
60

- 1  
2  
3  
4 86. Bringmann LF, Elmer T, Epskamp S, et al. What do centrality measures  
5 measure in psychological networks? *J Abnorm Psychol*.  
6 2019;128(8):892-903.  
7  
8  
9 87. Williams DR, Rhemtulla M, Wysocki AC, et al. On Nonregularized  
10 Estimation of Psychological Networks. *Multivariate Behavioral*  
11 *Research*. 2019;54(5):719-50.  
12  
13  
14 88. Epskamp S, Borsboom D, Fried EI. Estimating psychological networks  
15 and their accuracy: A tutorial paper. *Behav Res Methods*.  
16 2018;50(1):195-212.  
17  
18  
19 89. Epskamp S, Fried EI. A Tutorial on Regularized Partial Correlation  
20 Networks. *Psychol Methods*. 2018;23(4):617-34.  
21  
22  
23 90. Epskamp S, Waldorp LJ, Möttus R, et al. The Gaussian Graphical Model  
24 in Cross-Sectional and Time-Series Data. *Multivariate behavioral*  
25 *research*. 2018;53(4):453-80.  
26  
27  
28 91. Robinaugh DJ, Millner AJ, McNally RJ. Identifying highly influential  
29 nodes in the complicated grief network. *J Abnorm Psychol*.  
30 2016;125(6):747-57.  
31  
32  
33 92. van Borkulo C, Epskamp, S., & Robitzsch, A. IsingFit: Fitting Ising  
34 Models Using the Elasso Method. 2016. Available from: [https://CRAN.R-](https://CRAN.R-project.org/package=IsingFit)  
35 [project.org/package=IsingFit](https://CRAN.R-project.org/package=IsingFit).  
36  
37  
38 93. Csardi GN, T. The igraph software package for complex network  
39 research, InterJournal, Complex Systems 1695. 2006. Available from:  
40 <https://igraph.org>.  
41  
42  
43 94. Epskamp S, Constantini, G., Haslbeck, J. & Isvoranu, A. Package:  
44 'qgraph' 2021. Available from: [https://cran.r-](https://cran.r-project.org/web/packages/qgraph/qgraph.pdf)  
45 [project.org/web/packages/qgraph/qgraph.pdf](https://cran.r-project.org/web/packages/qgraph/qgraph.pdf).  
46  
47  
48 95. Epskamp S, Cramer, A., Waldorp, L., Schmittmann, V. & Borsboom, D.,  
49 . qgraph: Network Visualizations of Relationships in Psychometric Data:  
50 Journal of Statistical Software, 48(4), 1-18. ; 2012. Available from:  
51 <http://www.jstatsoft.org/v48/i04/>.  
52  
53  
54  
55  
56  
57  
58  
59  
60

- 1  
2  
3  
4 96. R Core Team. R: A language and environment for statistical computing  
5 Vienna, Austria: R Foundation for Statistical Computing; 2021. Available  
6 from: <https://www.R-project.org/>.  
7  
8  
9 97. van Borkulo & Epskamp SwcfR, A. Package 'IsingFit' 2016. Available  
10 from: <https://cran.r-project.org/web/packages/IsingFit/IsingFit.pdf>.  
11  
12  
13 98. Wickham H. ggplot2: Elegant Graphics for Data Analysis. New York:  
14 Springer-Verlag New York; 2016.  
15  
16  
17 99. Epskamp S, van Borkulo CD, van der Veen DC, et al. Personalized  
18 Network Modeling in Psychopathology: The Importance of  
19 Contemporaneous and Temporal Connections. *Clinical Psychological*  
20 *Science*. 2018;6(3):416-27.  
21  
22  
23  
24 100. van Borkulo CD, Borsboom D, Epskamp S, et al. A new method for  
25 constructing networks from binary data. *Sci Rep*. 2014;4(1):5918-  
26  
27  
28 101. Fruchterman TMJ, Reingold EM. Graph drawing by force-directed  
29 placement. *Software: Practice and Experience*. 1991;21(11):1129-64.  
30  
31  
32 [dataset] 102. Rex M. Data from: Final Major Network. The Open Science  
33 Framework Repository, October 19, 2021. Available from:  
34 [https://osf.io/3dhtf/?view\\_only=084563d6b38a4f5aa32f6d76c50c0a34](https://osf.io/3dhtf/?view_only=084563d6b38a4f5aa32f6d76c50c0a34).  
35  
36  
37 [dataset] 103. Rex M. Data from: Final deficiencies network. The Open  
38 Science Framework Repository, October 20, 2021. Available from:  
39 [https://osf.io/3dhtf/?view\\_only=084563d6b38a4f5aa32f6d76c50c0a34](https://osf.io/3dhtf/?view_only=084563d6b38a4f5aa32f6d76c50c0a34).  
40  
41  
42  
43 [dataset] 104. Rex M. Data from: Final Contributing factors network. The Open  
44 Science Framework Repository, October 14, 2021. Available from:  
45 [https://osf.io/3dhtf/?view\\_only=084563d6b38a4f5aa32f6d76c50c0a34](https://osf.io/3dhtf/?view_only=084563d6b38a4f5aa32f6d76c50c0a34).  
46  
47  
48  
49 [dataset] 105. Rex M. R script used in the manuscript Coexisting service  
50 related factors preceding suicide: A network analysis. The Open  
51 Science Framework Repository, October 21, 2021. Available from:  
52 [https://osf.io/3dhtf/?view\\_only=084563d6b38a4f5aa32f6d76c50c0a34](https://osf.io/3dhtf/?view_only=084563d6b38a4f5aa32f6d76c50c0a34).  
53  
54  
55  
56 106. Epskamp S. Package: 'bootnet' 2021 updated 2021-10-25. Available  
57 from: <https://cran.r-project.org/web/packages/bootnet/bootnet.pdf>.  
58  
59  
60

1  
2  
3  
4 107. Fried EI, Robinaugh DJ. Systems all the way down: embracing  
5 complexity in mental health research. *BMC Med.* 2020;18(1):205-  
6  
7  
8  
9  
10  
11  
12  
13  
14  
15  
16  
17  
18  
19  
20  
21  
22

23 Figure 1. Major Network: significant differences ( $\alpha = 0.05$ ) of edges.  
24  
25  
26

27 Figure 2. Major network: standardized centrality index and significant differences ( $\alpha = 0.05$ ) of  
28 node strength.  
29  
30  
31  
32

33 Figure 3. Deficiencies network: significant differences ( $\alpha = 0.05$ ) of edges.  
34  
35  
36  
37

38 Figure 4. Deficiencies network: standardized centrality index and significant differences ( $\alpha = 0.05$ )  
39 of node strength.  
40  
41  
42  
43  
44  
45  
46  
47  
48  
49  
50  
51  
52  
53  
54  
55  
56  
57  
58  
59  
60



1  
2  
3  
4  
5  
6  
7  
8  
9  
10  
11  
12  
13  
14  
15  
16  
17  
18  
19  
20  
21  
22  
23  
24  
25  
26  
27  
28  
29  
30  
31  
32  
33  
34  
35  
36  
37  
38

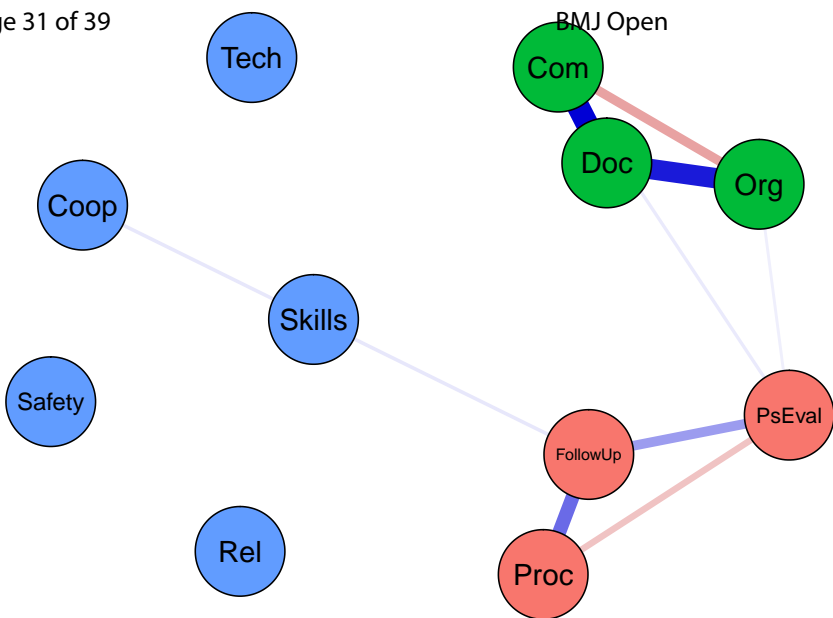

- Community 1
- Community 2
- Disconnected nodes

edge

|                 |         |             |            |            |               |                 |               |         |         |
|-----------------|---------|-------------|------------|------------|---------------|-----------------|---------------|---------|---------|
| Doc—Com         |         |             |            |            |               |                 |               |         |         |
| Doc—Org         |         |             |            |            |               |                 |               |         |         |
| FollowUp—Proc   |         |             |            |            |               |                 |               |         |         |
| PsEval—FollowUp |         |             |            |            |               |                 |               |         |         |
| Coop—FollowUp   |         |             |            |            |               |                 |               |         |         |
| PsEval—Com      |         |             |            |            |               |                 |               |         |         |
| PsEval—Org      |         |             |            |            |               |                 |               |         |         |
| PsEval—Proc     |         |             |            |            |               |                 |               |         |         |
| Org—Com         |         |             |            |            |               |                 |               |         |         |
|                 | Org—Com | PsEval—Proc | PsEval—Org | PsEval—Com | Coop—FollowUp | PsEval—FollowUp | FollowUp—Proc | Doc—Org | Doc—Com |



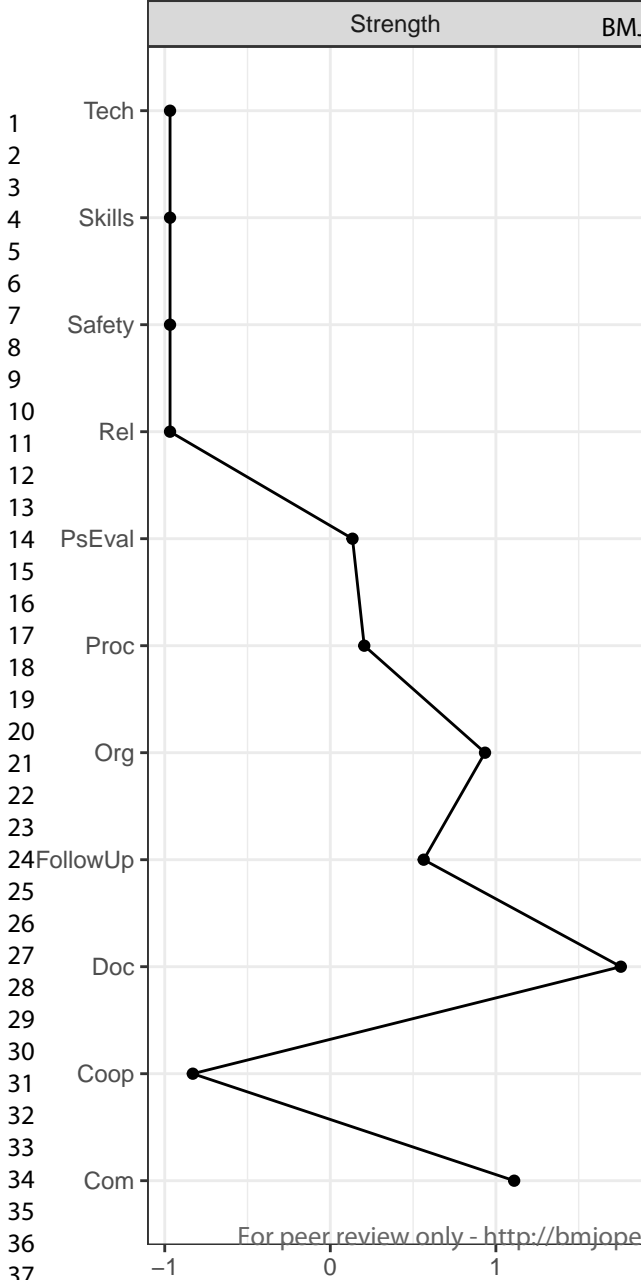

For peer review only - <http://bmjopen.bmj.com/site/about/guidelines.xhtml>

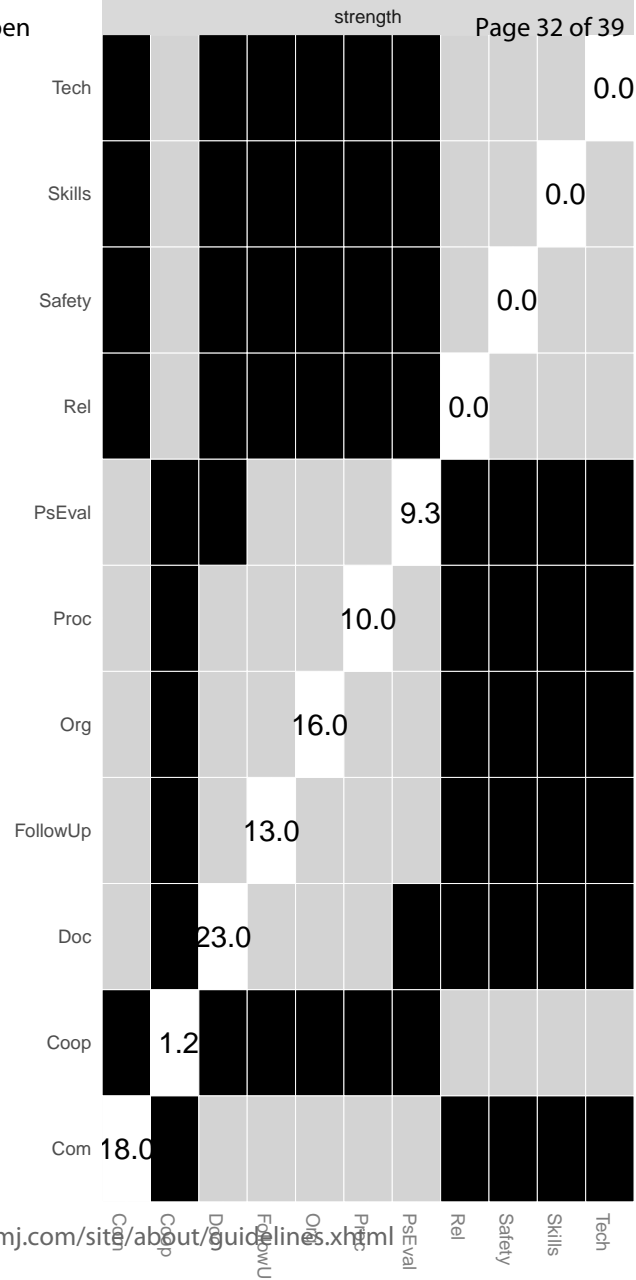

1  
2  
3  
4  
5  
6  
7  
8  
9  
10  
11  
12  
13  
14  
15  
16  
17  
18  
19  
20  
21  
22  
23  
24  
25  
26  
27  
28  
29  
30  
31  
32  
33  
34  
35  
36  
37  
38

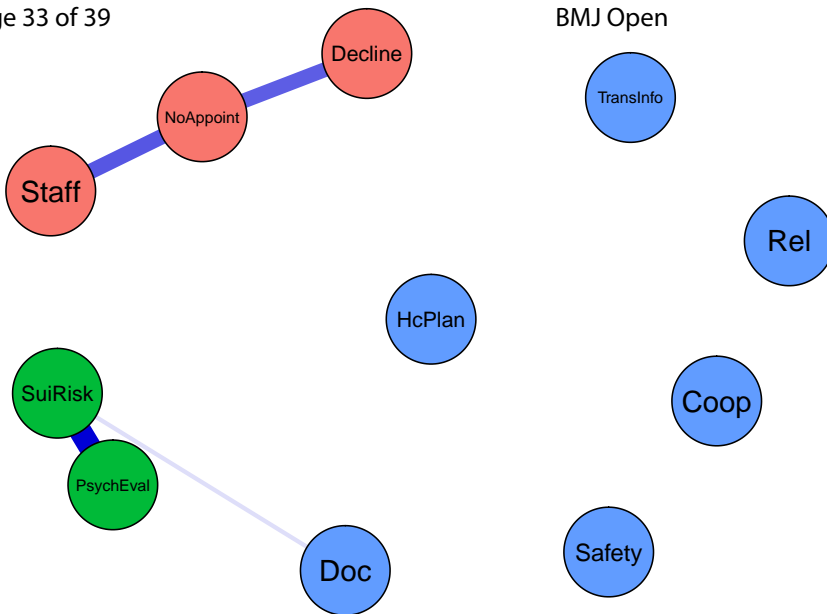

- Community 1
- Community 2
- Disconnected nodes

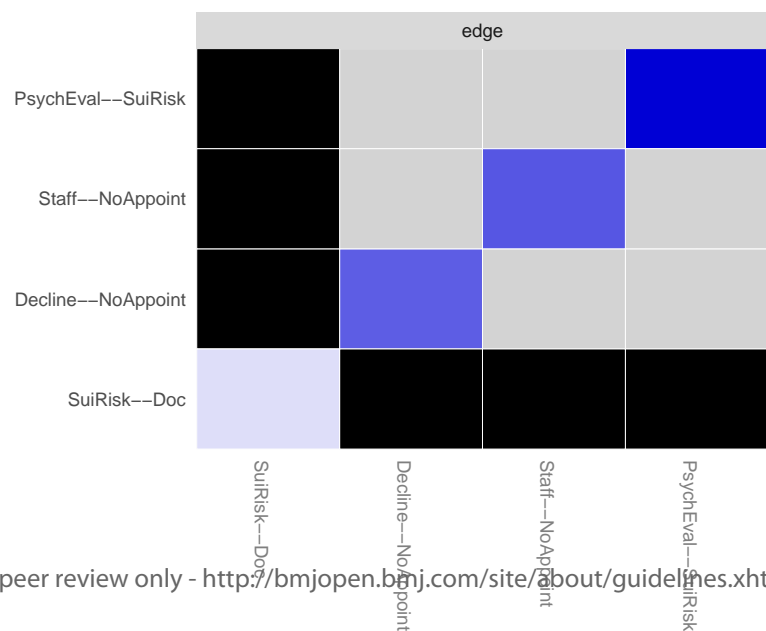

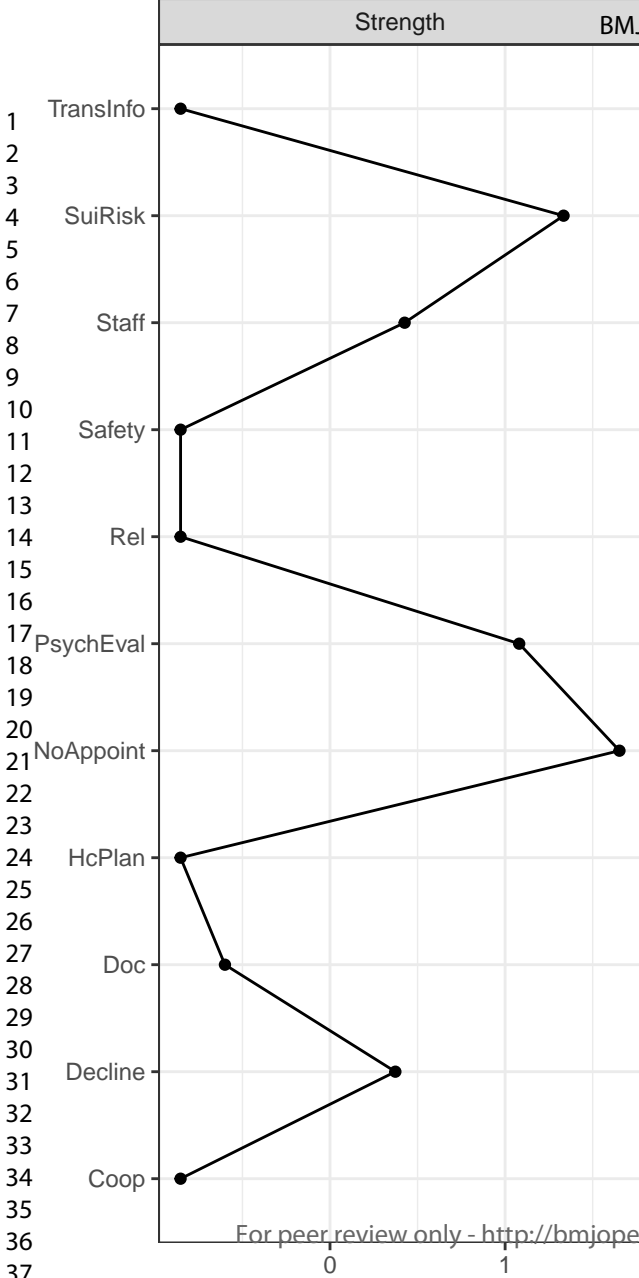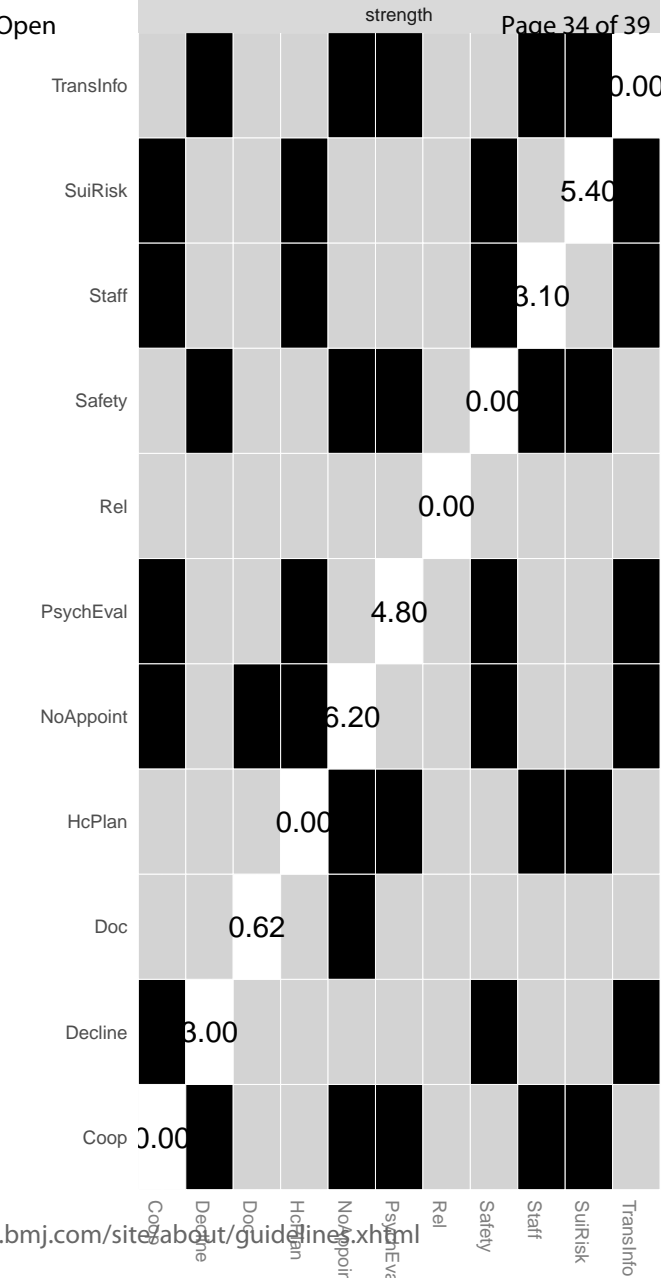

STROBE Statement—Checklist of items that should be included in reports of *cross-sectional studies*

|                           | Item No | Recommendation                                                                                                                                                                                    | Page       |
|---------------------------|---------|---------------------------------------------------------------------------------------------------------------------------------------------------------------------------------------------------|------------|
| <b>Title and abstract</b> | 1       | (a) Indicate the study's design with a commonly used term in the title or the abstract                                                                                                            | Title page |
|                           |         | (b) Provide in the abstract an informative and balanced summary of what was done and what was found                                                                                               | 1-2        |
| <b>Introduction</b>       |         |                                                                                                                                                                                                   |            |
| Background/rationale      | 2       | Explain the scientific background and rationale for the investigation being reported                                                                                                              | 3-4        |
| Objectives                | 3       | State specific objectives, including any prespecified hypotheses                                                                                                                                  | 4          |
| <b>Methods</b>            |         |                                                                                                                                                                                                   |            |
| Study design              | 4       | Present key elements of study design early in the paper                                                                                                                                           | 4-8        |
| Setting                   | 5       | Describe the setting, locations, and relevant dates, including periods of recruitment, exposure, follow-up, and data collection                                                                   | 4-6        |
| Participants              | 6       | (a) Give the eligibility criteria, and the sources and methods of selection of participants                                                                                                       | 4-7        |
| Variables                 | 7       | Clearly define all outcomes, exposures, predictors, potential confounders, and effect modifiers. Give diagnostic criteria, if applicable                                                          | 6-10       |
| Data sources/measurement  | 8*      | For each variable of interest, give sources of data and details of methods of assessment (measurement). Describe comparability of assessment methods if there is more than one group              | 6-10       |
| Bias                      | 9       | Describe any efforts to address potential sources of bias                                                                                                                                         | 4-7, 15-16 |
| Study size                | 10      | Explain how the study size was arrived at                                                                                                                                                         | 4-5        |
| Quantitative variables    | 11      | Explain how quantitative variables were handled in the analyses. If applicable, describe which groupings were chosen and why                                                                      | 7-8        |
| Statistical methods       | 12      | (a) Describe all statistical methods, including those used to control for confounding                                                                                                             | 7-8        |
|                           |         | (b) Describe any methods used to examine subgroups and interactions                                                                                                                               | N/A        |
|                           |         | (c) Explain how missing data were addressed                                                                                                                                                       | 6          |
|                           |         | (d) If applicable, describe analytical methods taking account of sampling strategy                                                                                                                | N/A        |
|                           |         | (e) Describe any sensitivity analyses                                                                                                                                                             | 7-8        |
| <b>Results</b>            |         |                                                                                                                                                                                                   |            |
| Participants              | 13*     | (a) Report numbers of individuals at each stage of study—eg numbers potentially eligible, examined for eligibility, confirmed eligible, included in the study, completing follow-up, and analysed | N/A        |
|                           |         | (b) Give reasons for non-participation at each stage                                                                                                                                              | N/A        |
|                           |         | (c) Consider use of a flow diagram                                                                                                                                                                | N/A        |
| Descriptive data          | 14*     | (a) Give characteristics of study participants (eg demographic, clinical, social) and information on exposures and potential confounders                                                          | 5-6        |
|                           |         | (b) Indicate number of participants with missing data for each variable of interest                                                                                                               | 5-6        |
| Outcome data              | 15*     | Report numbers of outcome events or summary measures                                                                                                                                              | 9-11       |

|    |                          |    |                                                                                |
|----|--------------------------|----|--------------------------------------------------------------------------------|
| 1  |                          |    |                                                                                |
| 2  | Main results             | 16 | (a) Give unadjusted estimates and, if applicable, confounder-adjusted          |
| 3  |                          |    | estimates and their precision (eg, 95% confidence interval). Make clear        |
| 4  |                          |    | which confounders were adjusted for and why they were included                 |
| 5  |                          |    | 7-8, 11                                                                        |
| 6  |                          |    | (b) Report category boundaries when continuous variables were                  |
| 7  |                          |    | categorized                                                                    |
| 8  |                          |    | N/A                                                                            |
| 9  |                          |    | (c) If relevant, consider translating estimates of relative risk into absolute |
| 10 |                          |    | risk for a meaningful time period                                              |
| 11 | Other analyses           | 17 | Report other analyses done—eg analyses of subgroups and interactions,          |
| 12 |                          |    | and sensitivity analyses                                                       |
| 13 |                          |    | N/A                                                                            |
| 14 | <b>Discussion</b>        |    |                                                                                |
| 15 | Key results              | 18 | Summarise key results with reference to study objectives                       |
| 16 | Limitations              | 19 | Discuss limitations of the study, taking into account sources of potential     |
| 17 |                          |    | bias or imprecision. Discuss both direction and magnitude of any               |
| 18 |                          |    | potential bias                                                                 |
| 19 |                          |    | 15-16                                                                          |
| 20 | Interpretation           | 20 | Give a cautious overall interpretation of results considering objectives,      |
| 21 |                          |    | limitations, multiplicity of analyses, results from similar studies, and       |
| 22 |                          |    | other relevant evidence                                                        |
| 23 |                          |    | 13-15                                                                          |
| 24 | Generalisability         | 21 | Discuss the generalisability (external validity) of the study results          |
| 25 |                          |    | 13-15                                                                          |
| 26 | <b>Other information</b> |    |                                                                                |
| 27 | Funding                  | 22 | Give the source of funding and the role of the funders for the present         |
| 28 |                          |    | study and, if applicable, for the original study on which the present          |
| 29 |                          |    | article is based                                                               |
| 30 |                          |    | 16                                                                             |

\*Give information separately for exposed and unexposed groups.

**Note:** An Explanation and Elaboration article discusses each checklist item and gives methodological background and published examples of transparent reporting. The STROBE checklist is best used in conjunction with this article (freely available on the Web sites of PLoS Medicine at <http://www.plosmedicine.org/>, Annals of Internal Medicine at <http://www.annals.org/>, and Epidemiology at <http://www.epidem.com/>). Information on the STROBE Initiative is available at [www.strobe-statement.org](http://www.strobe-statement.org).

### BMJ Open

1  
2  
3  
4  
5  
6  
7  
8  
9  
10  
11  
12  
13  
14  
15  
16  
17  
18  
19  
20  
21  
22  
23  
24  
25  
26  
27  
28  
29  
30  
31  
32  
33  
34  
35  
36  
37  
38

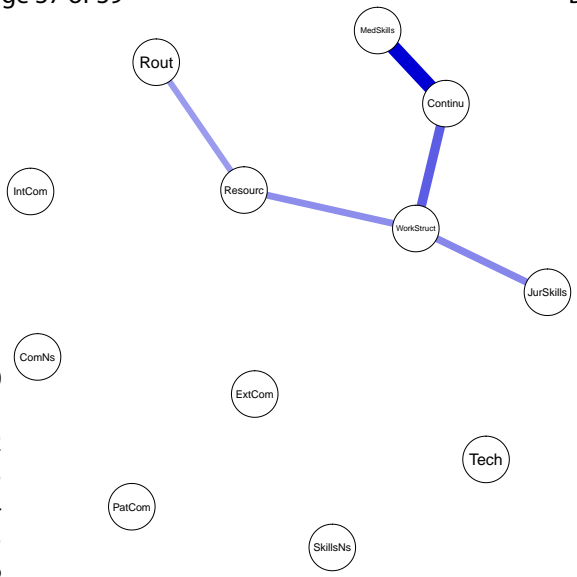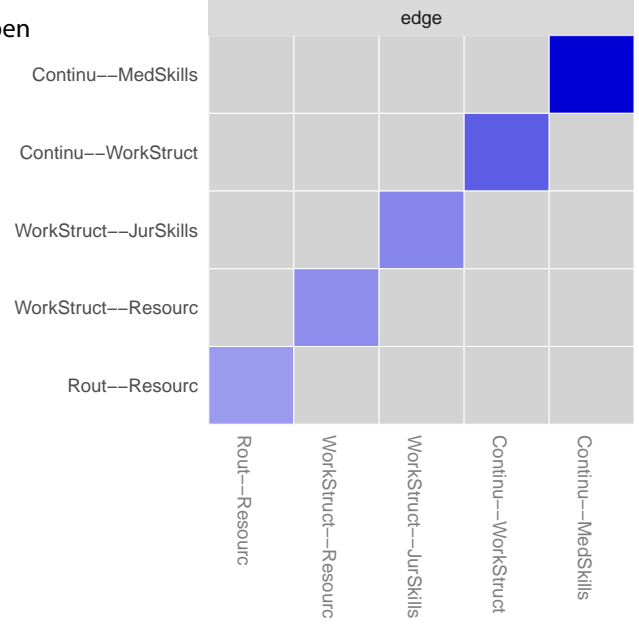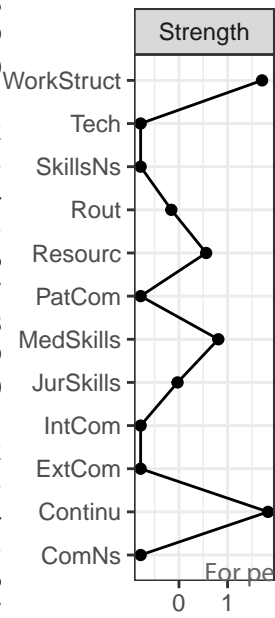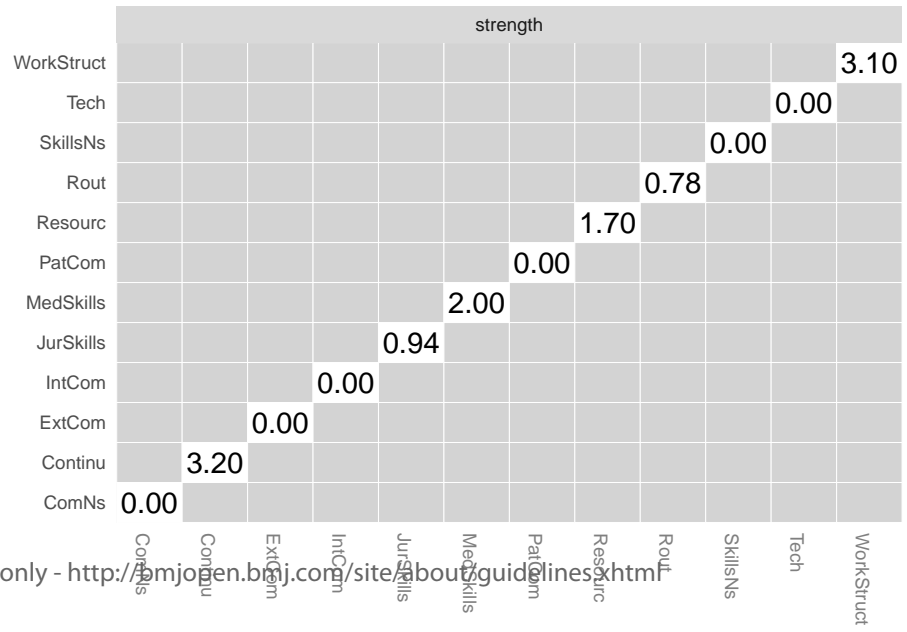

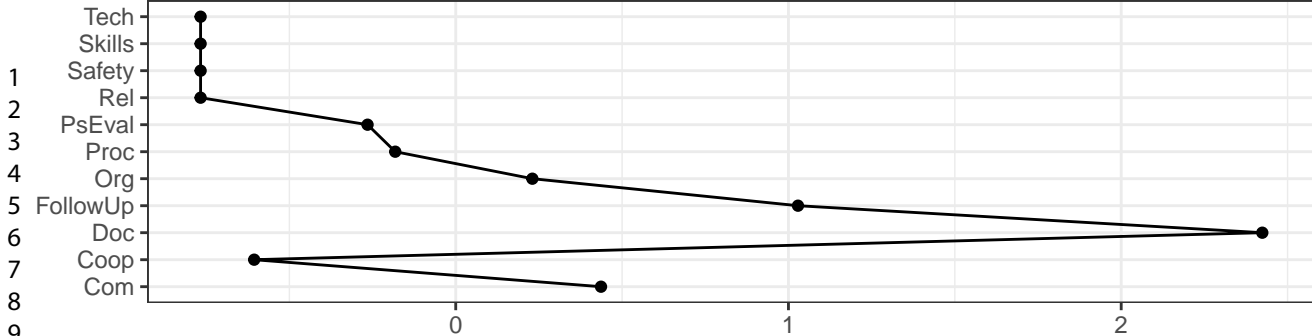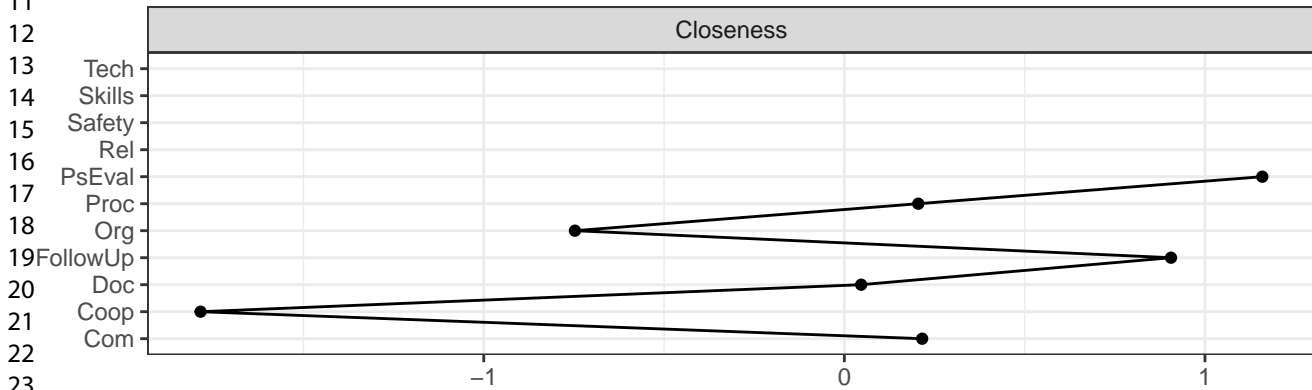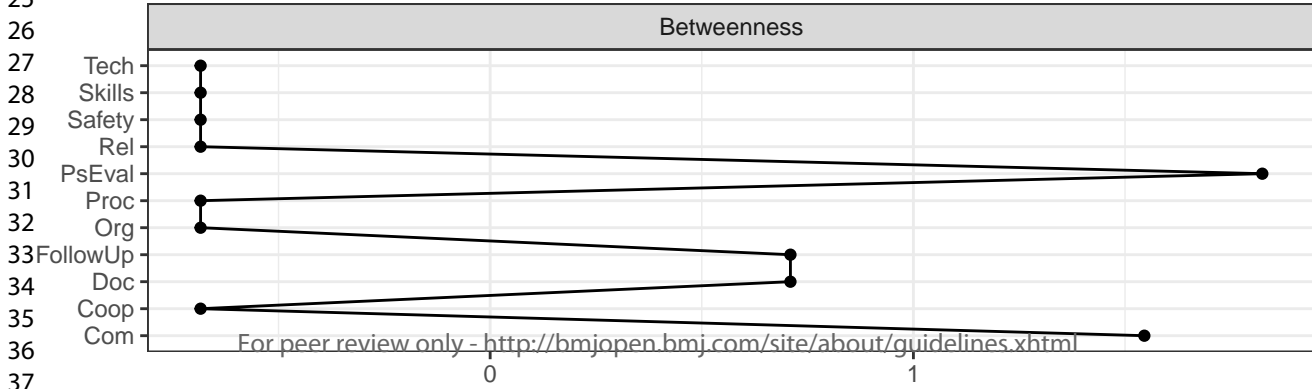

### BMJ Open

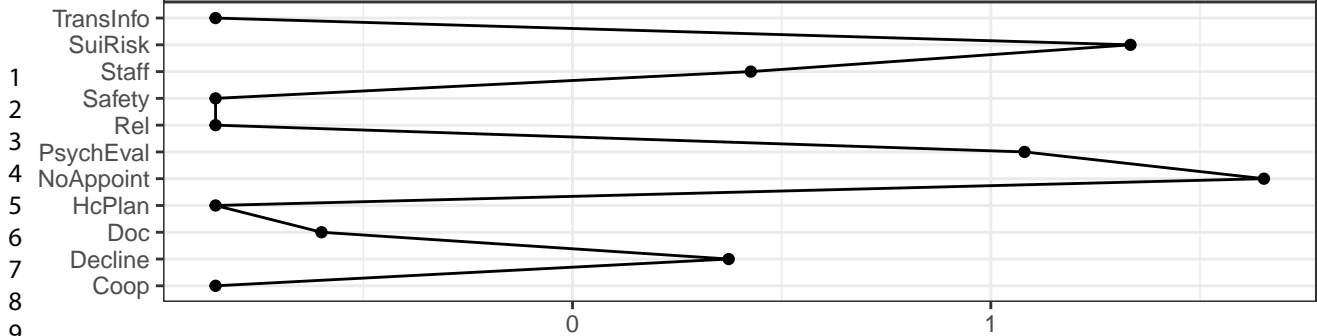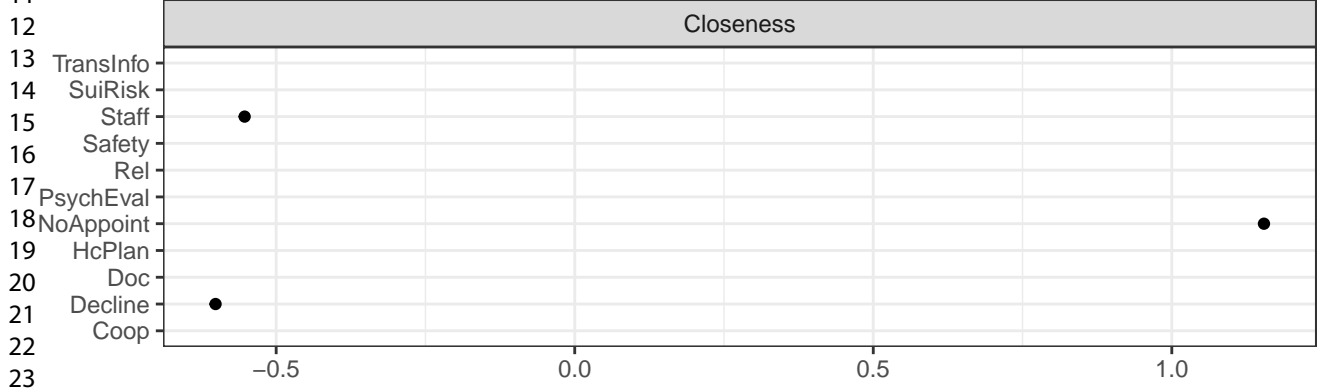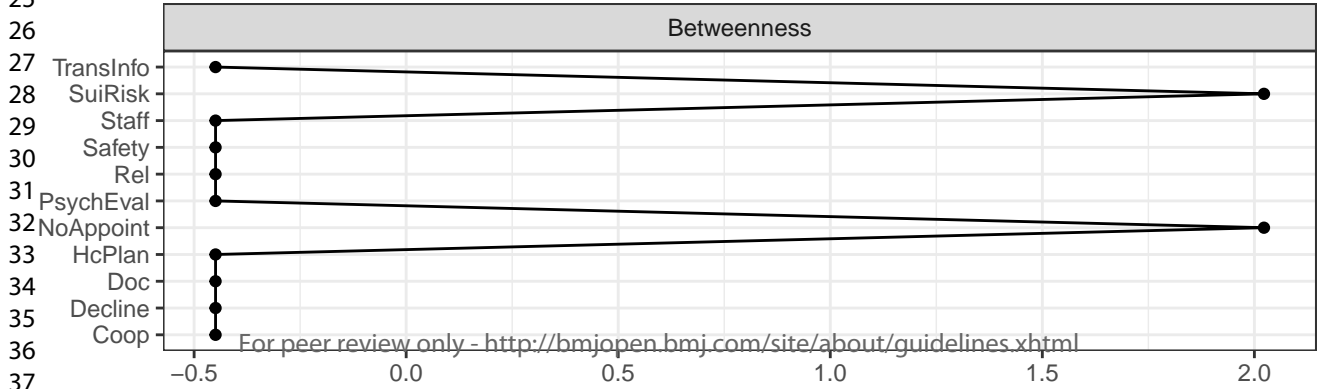



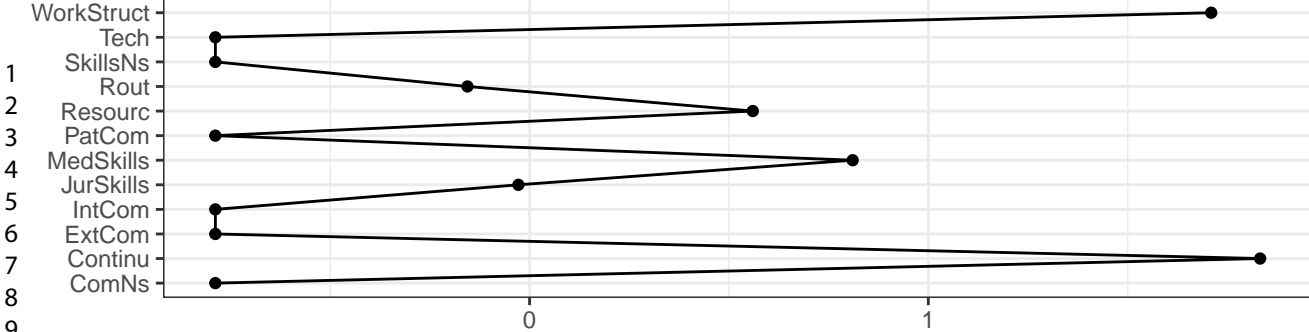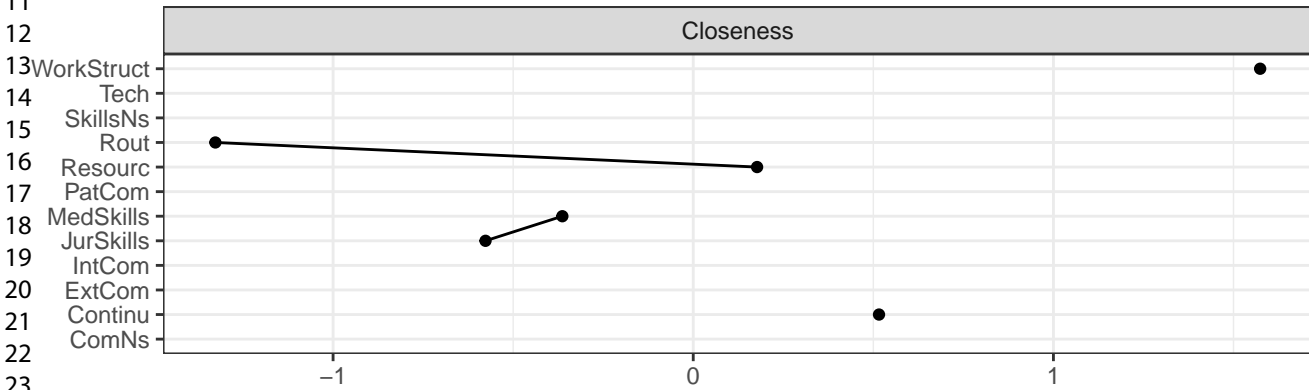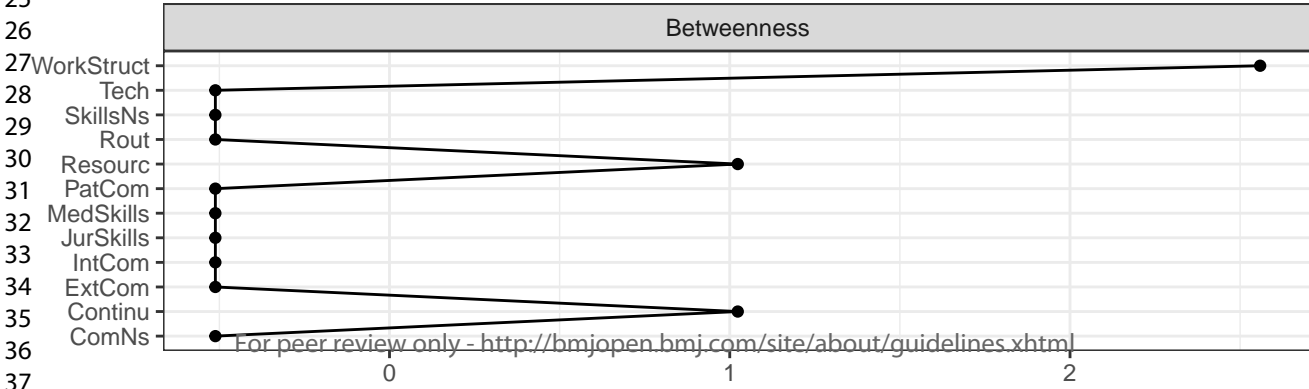

Supplement: bmjopen-2021-050953.draft_revisions.pdf [file bmjopen-2021-050953.draft_revisions.pdf]
