# Supplementary material for: Coexisting service-related factors preceding suicide: a network analysis
Source: HighWire-hosted journal article supplement (doi:10.1136/bmjopen-2021-050953), 2022-04-01

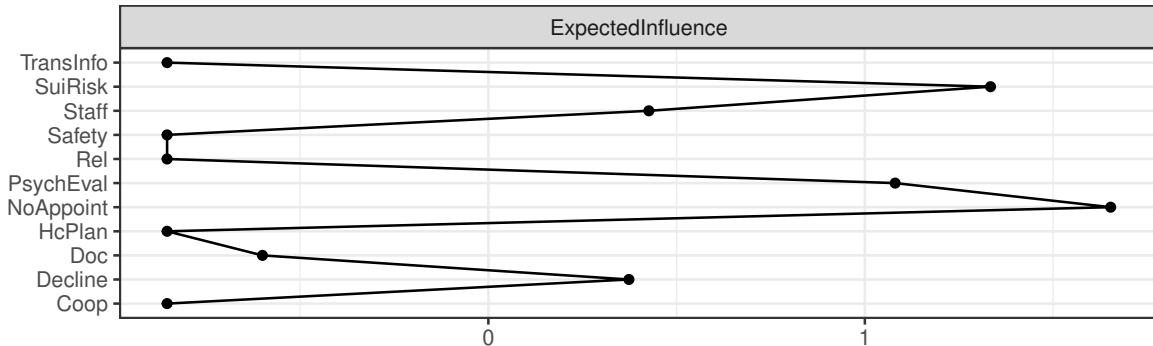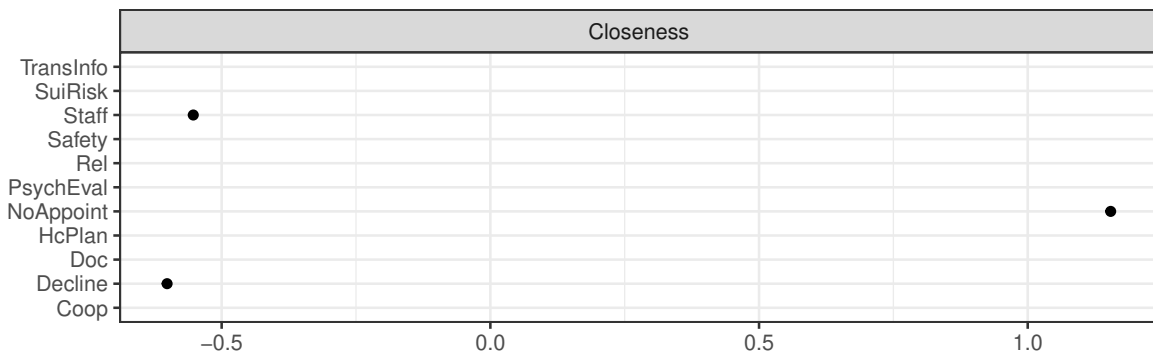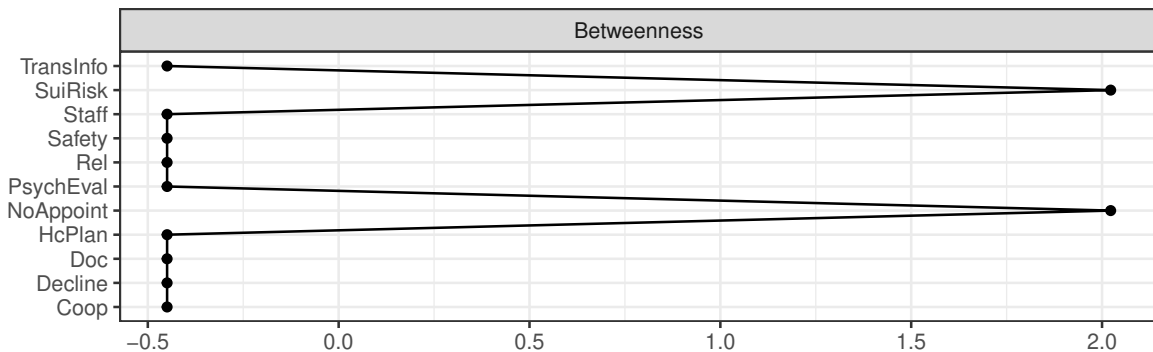

Supplement: bmjopen-2021-050953supp004_data_supplement.pdf [file bmjopen-2021-050953supp004_data_supplement.pdf]
